# Supplementary material for: Enzymatic syntheses of novel carbocyclic scaffolds with a 6,5 + 5,5 ring system by squalene-hopene cyclase
Source: Royal Society of Chemistry journal article supplement (doi:10.1039/c9ob01941c), 2019-01-01
Supplement: c9ob01941c1.pdf [file c9ob01941c1.pdf]

## Electronic Supplementary Information (ESI)

**Novel carbocyclic scaffolds with a 6,5+5,5 ring system, named nor-allodammarane, from the enzymatic reactions of 27-nor-(oxido)squalenes with hopene synthase**

Chiaki Nakano, Takumi Watanabe, Mai Minamino and Tsutomu Hoshino\*

Department of Applied Biological Chemistry, Faculty of Agriculture, and Graduate School of Science and Technology, Niigata University, Ikarashi 2-8050, Nishi-ku, Niigata, Japan, 950-2181

\*Corresponding author: [hoshitsu@agr.niigata-u.ac.jp](mailto:hoshitsu@agr.niigata-u.ac.jp)

## Contents

|                                                                                                                                                            |              |
|------------------------------------------------------------------------------------------------------------------------------------------------------------|--------------|
| 1. Enzymatic reaction of racemic mixture of (3 <i>R</i> , <i>S</i> )-27-nor-2,3-oxidosqualenes (27-norOXSQ, <b>18</b> and <b>19</b> ) with the native SHC. | page S3-S4   |
| 2. Enzymatic reaction of <b>13a(b)</b> with SHC.                                                                                                           | page S5.     |
| 3. NMR spectra of product <b>21</b> in CDCl <sub>3</sub>                                                                                                   | page S6-S9.  |
| 4. NMR spectra of product <b>21</b> in C <sub>6</sub> D <sub>6</sub> .                                                                                     | page S10-S14 |
| 5. NMR spectra of product <b>23</b> in C <sub>6</sub> D <sub>6</sub> .                                                                                     | page S15-S19 |
| 6. NMR spectra of product <b>25</b> in C <sub>6</sub> D <sub>6</sub> .                                                                                     | page S20-S24 |
| 7. EIMS and NMR data of product <b>26</b>                                                                                                                  | page S25-S29 |
| 8. EIMS and NMR data of product <b>27</b> .                                                                                                                | page S30-S34 |
| 9. EIMS and NMR data of product <b>28</b>                                                                                                                  | page S35-S39 |
| 10. EIMS and NMR data of product <b>29</b> .                                                                                                               | page S40-S44 |
| 11. EIMS and NMR data of product <b>30</b> .                                                                                                               | page S45-S49 |
| 12. EIMS and NMR data of product <b>31</b> .                                                                                                               | page S50-S55 |

**1. Enzymatic reaction of racemic mixture of (3*R*, 5*S*)-27-nor-2,3-oxidosqualenes (27-norOXSQ, 18 and 19) with the native SHC.**

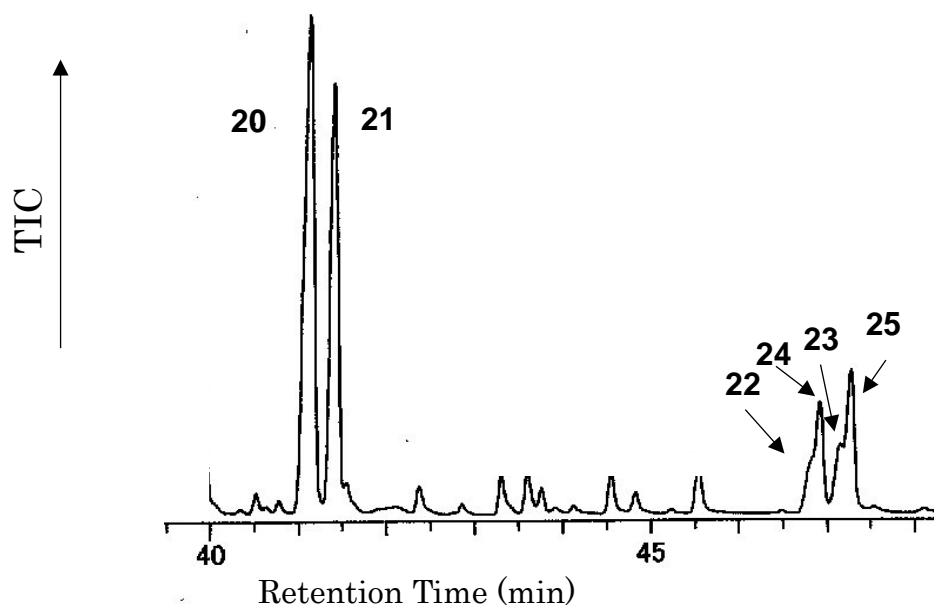

**Fig. S1.1. GCMS profile (TIC) of Products 20–25 from 18 and 19**

GC-TOFF MS conditions: Inject temp : 280°C; Column temp: 150-280°C (3°C /min); Flow : 1.0 mL/min

Product structures are shown below.

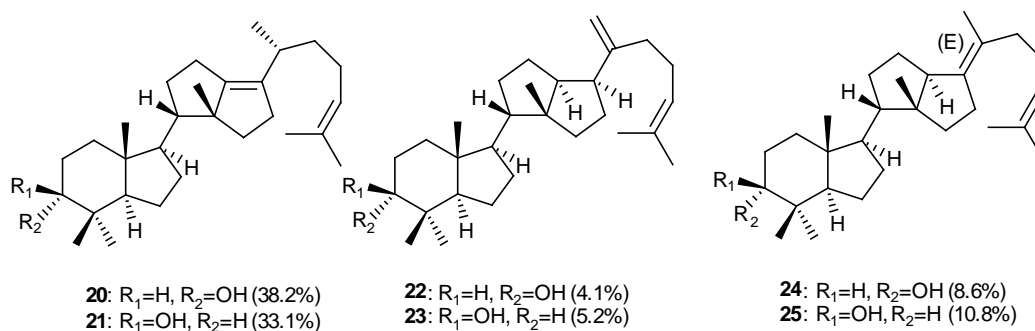

Compound names are as follows: **20**, 3 $\alpha$ -hydroxy-(8*R*,10*S*,14*R*,20*R*)-30-nor-allodammara-13(17),24-diene; **21**, 3 $\beta$ -hydroxy-(8*R*,10*S*,14*R*,20*R*)-30-nor-allodammara-13(17),24-diene; **22**, 3 $\alpha$ -hydroxy-(8*R*,10*S*,13*S*,14*S*,17*S*)-30-nor-allodammara-20(21),24-diene; **23**, 3 $\beta$ -hydroxy-(8*R*,10*S*,13*S*,14*S*,17*S*)-30-nor-allodammara-20(21),24-diene; **24**, 3 $\alpha$ -hydroxy-(8*R*,10*S*,13*R*,14*R*)-30-nor-allodammara-(*E*)-17(20),24-diene; and **25**, 3 $\beta$ -hydroxy-(8*R*,10*S*,13*R*,14*R*)-30-nor-allodammara-(*E*)-17(20),24-diene.

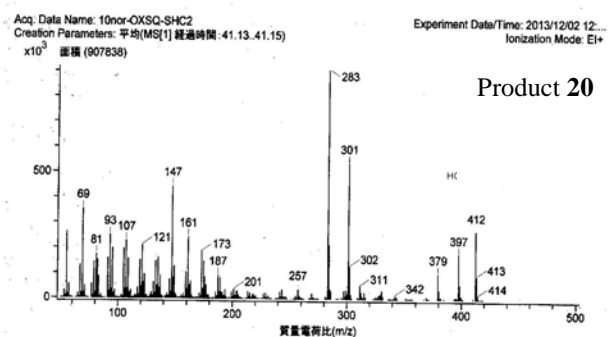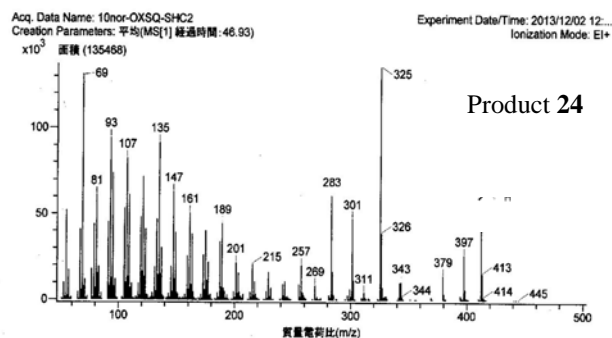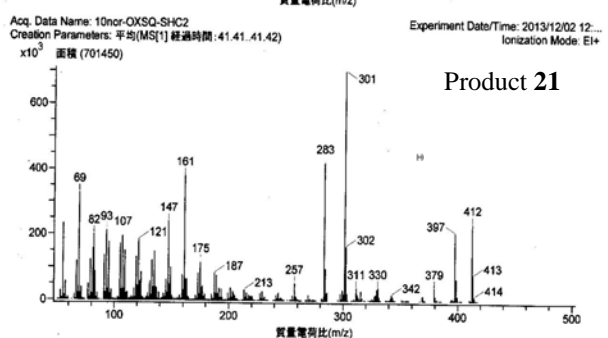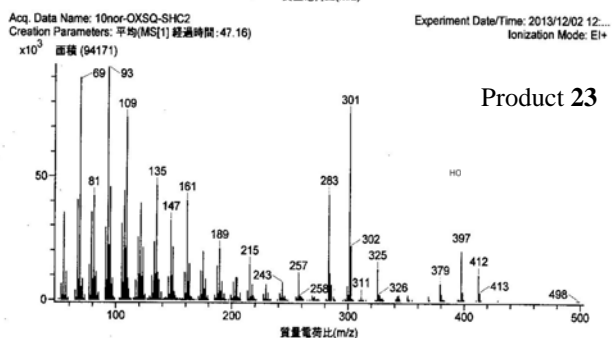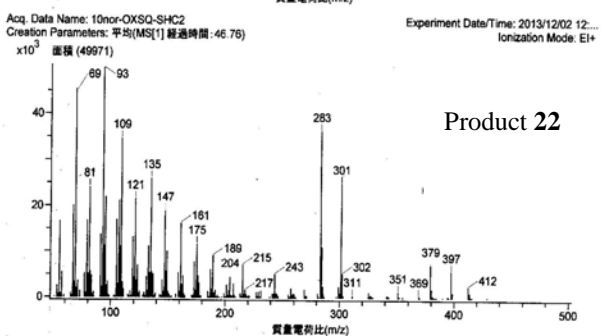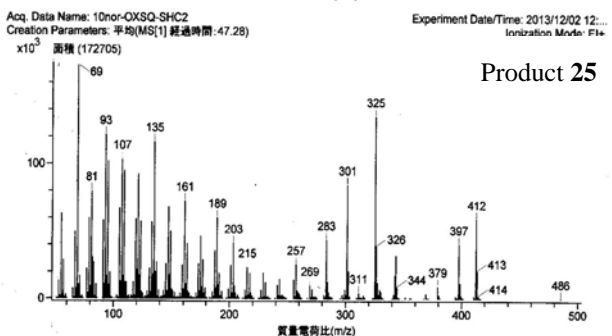

**Fig. S1.2.** EI-MS spectra of products 20-25

## 2. Enzymatic reaction of 13a(b) with SHC.

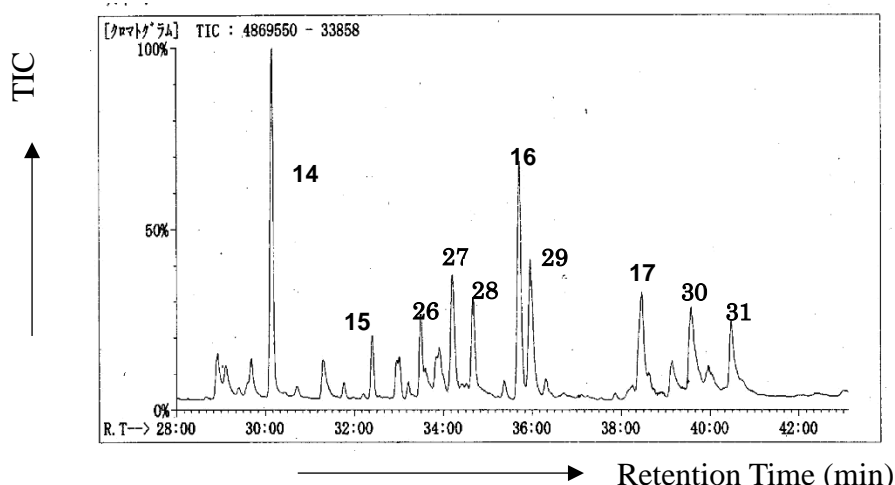

**Fig. S2.** GC-MS trace (TIC) of the hexane-extract of the incubation mixture of **13a(13b)**.

GC-Q-MS conditions: Inject temp : 280°C; Column temp: 150-280°C (3°C /min); Flow : 1.0 mL/min.

Structures of products **14**, **15**, **16** and **17** were reported in our previous paper (T. Hoshino and S. Ohashi, *Org. Let.*, **2002**, *4*, 2553-2556). However, the stereochemistry at C-20 of **14** and **15** has remained ambiguous. In addition to **14** and **15**, many enzymatic products **26–31** were newly found from the incubation mixture of **13a** and **13b** with the native SHC. Notably, product **29**, which is a key intermediate for predicting the configurations at C-20 of **14** and **15**, was detected in a substantial amount. Product structures are shown below.

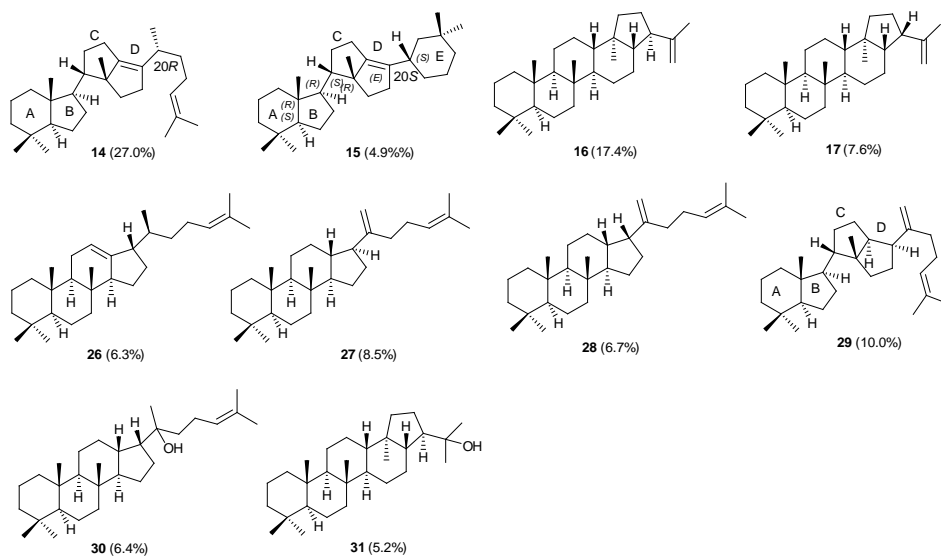

Compound names are as follows: **14**, (8*R*,10*S*,14*R*,20*R*)-30-nor-allodammara-13(17),24-diene; **15**, (8*R*,10*S*,14*R*,20*S*)-30-nor-allogammacer-13(17)-ene; **16**, 27-nor-isohopene (21-*epi*-hop-22(29)-ene); **17**, 27-nor-hopene; **26**, (20*S*)-30-nor-isodammara-12(13),24-diene (30-nor-17-*epi*-dammara-12(13),24-diene); **27**, 30-nor-dammara-20(21),24-diene; **28**, 30-nor-isodammara-20(21),24-diene (30-nor-17-*epi*-dammara-20(21),24-diene); **29**, (8*R*,10*S*, 13*S*, 14*S*, 17*S*)-30-nor-allodammara-20(21),24-diene; **30**, 30-nor-20-hydroxy-isodammara-24-ene (17-*epi*-20-hydroxy-dammarene); and **31**, 27-nor-isohopanol (21-*epi*-27-norhopanol).

### 3. NMR spectra of product **21** in CDCl<sub>3</sub>.

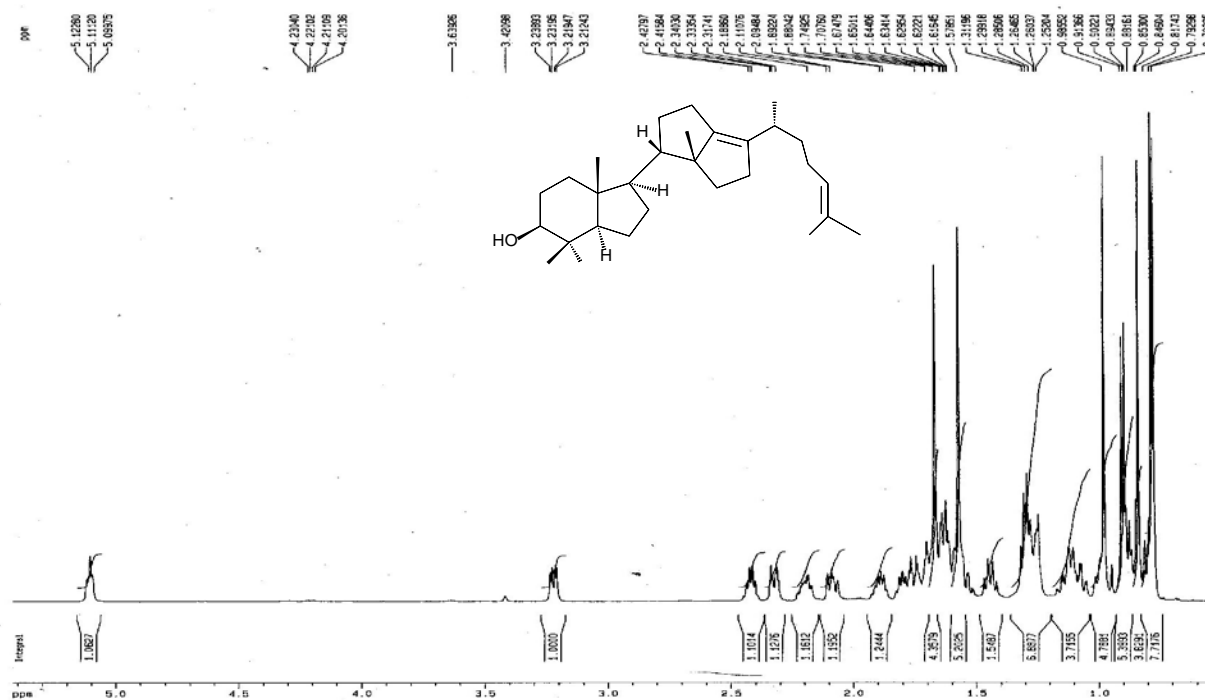

Fig. S3.1. <sup>1</sup>H-NMR spectrum of product **21** in CDCl<sub>3</sub> (600 MHz).

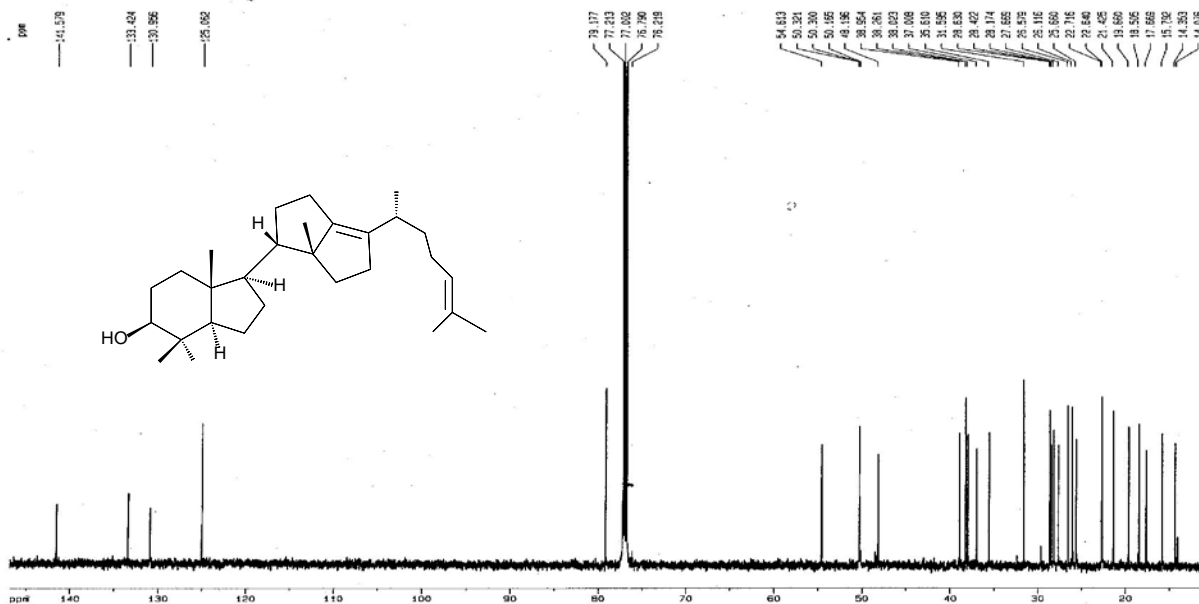

Fig. S3.2. <sup>13</sup>C-NMR spectrum of product **21** in CDCl<sub>3</sub> (600 MHz) (150 MHz).

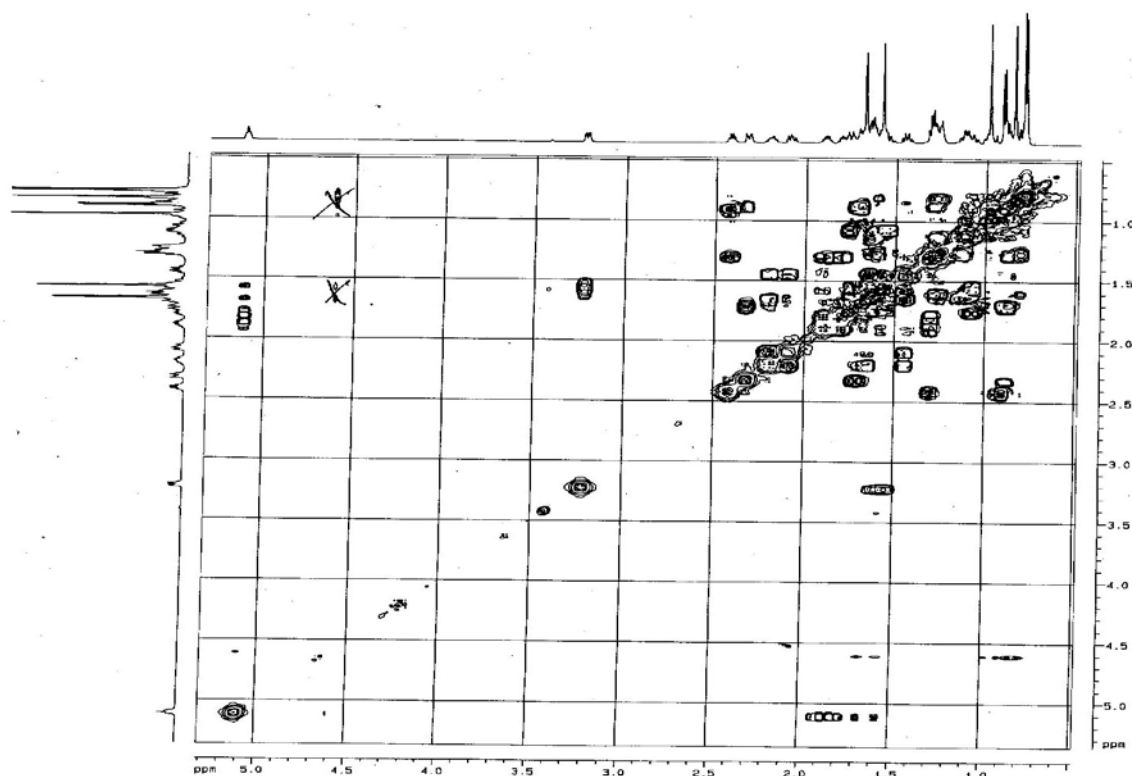

**Fig. S3.3.**  $^1\text{H}$ - $^1\text{H}$  COSY spectrum of product **21** in  $\text{CDCl}_3$ .

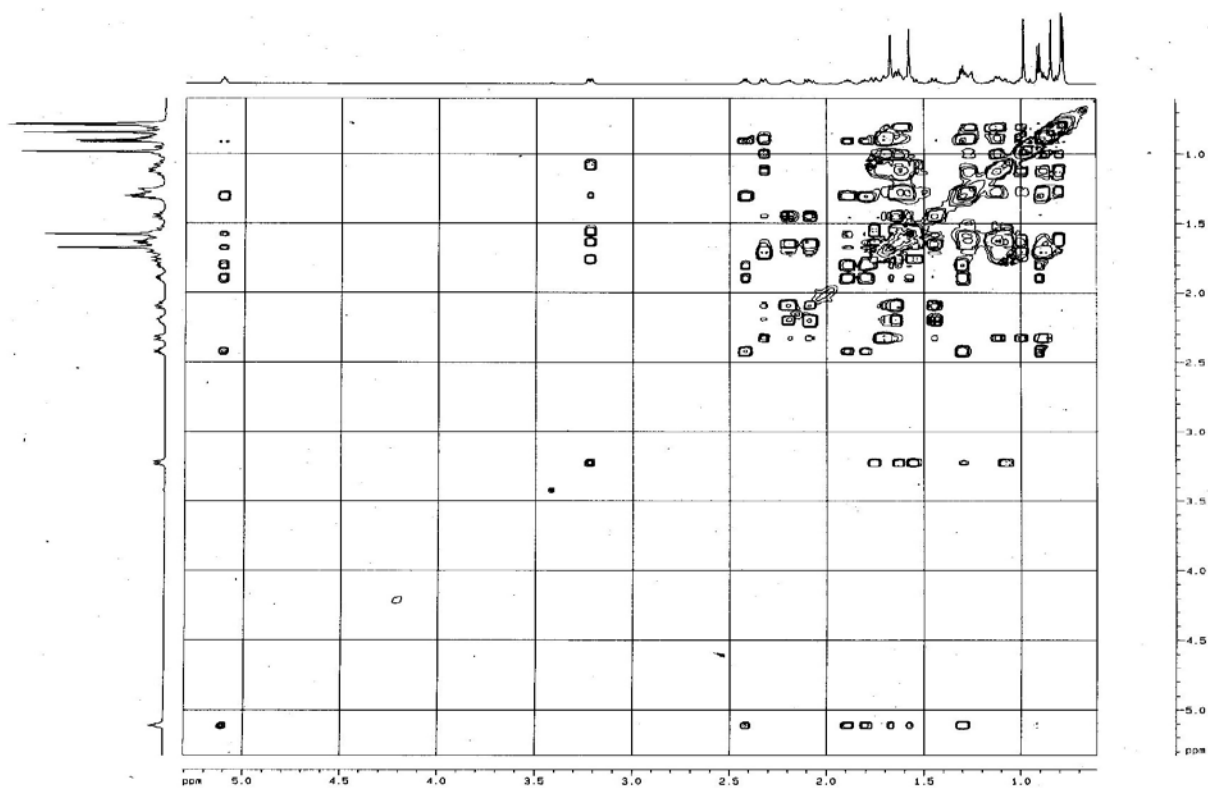

**Fig. S3.4.** TOCSY spectrum of product **21** in  $\text{CDCl}_3$ .

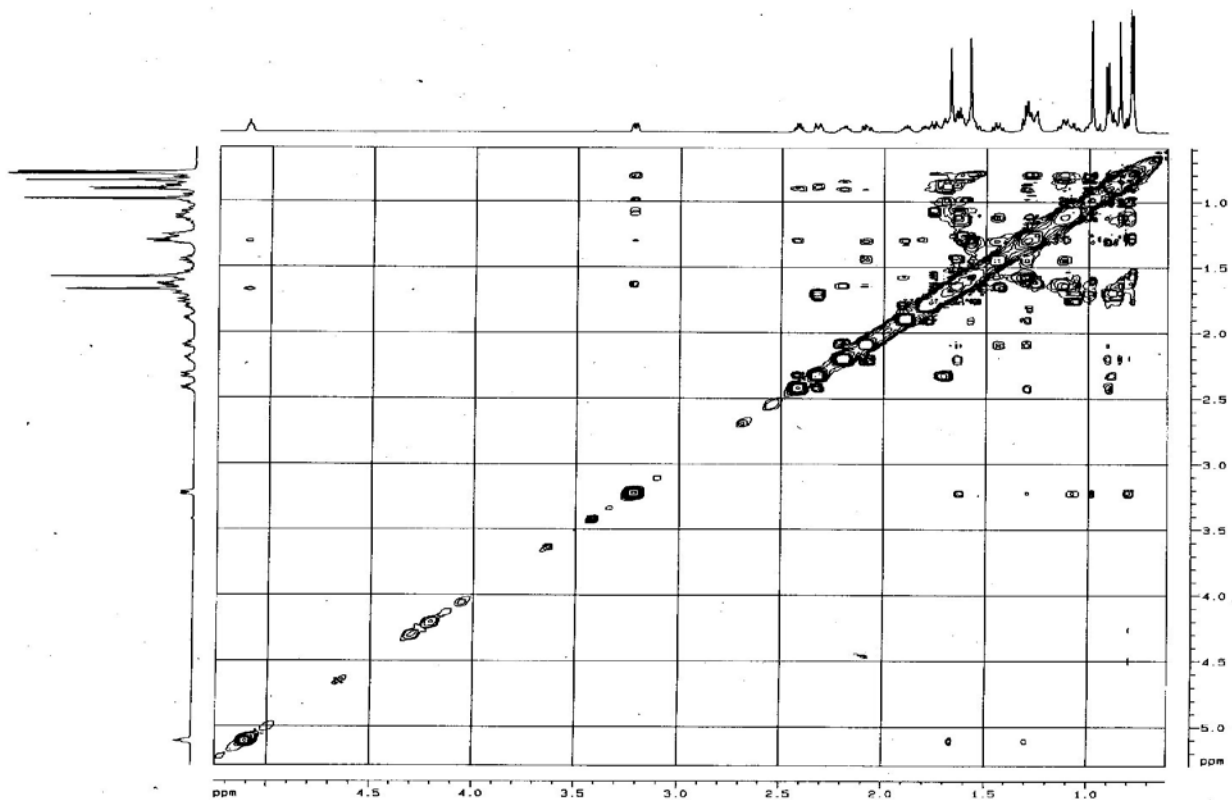

Fig. S3.5. NOESY spectrum of product **21** in  $\text{CDCl}_3$ .

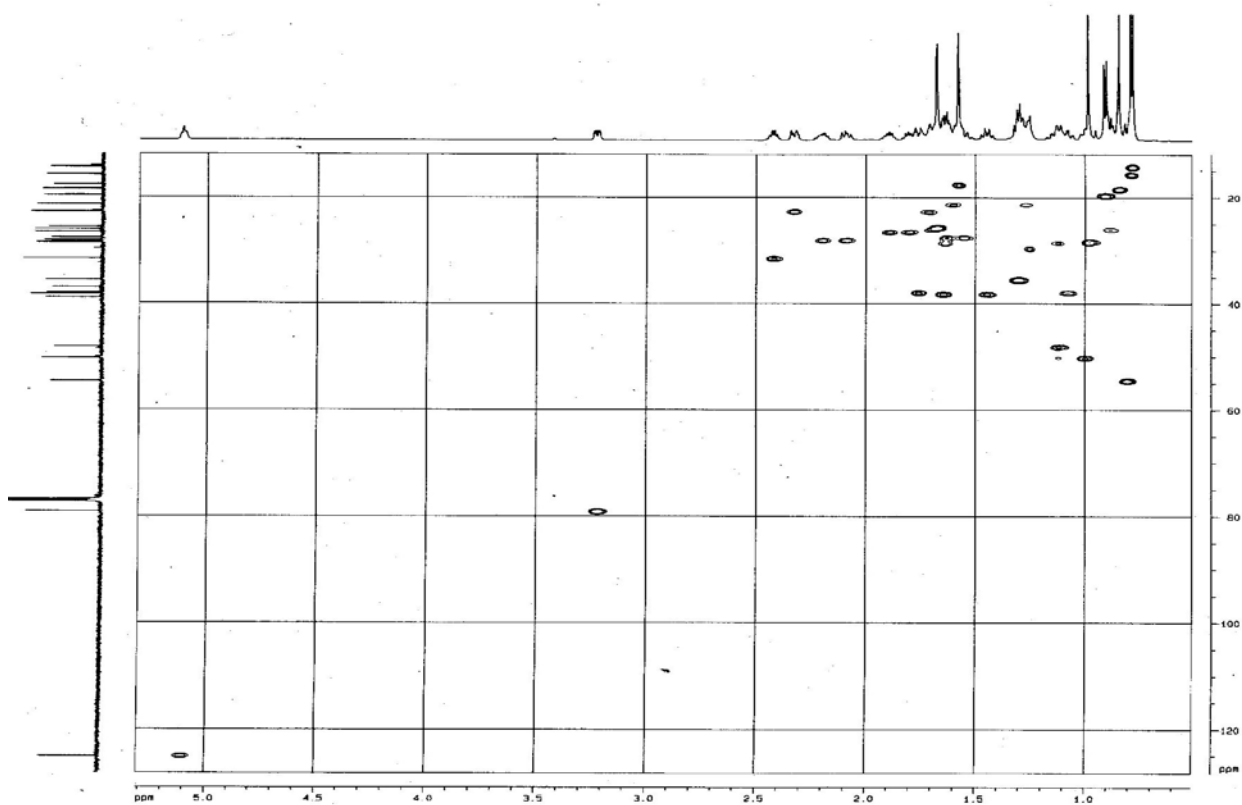

Fig. S3.6. HSQC spectrum of product **21** in  $\text{CDCl}_3$ .



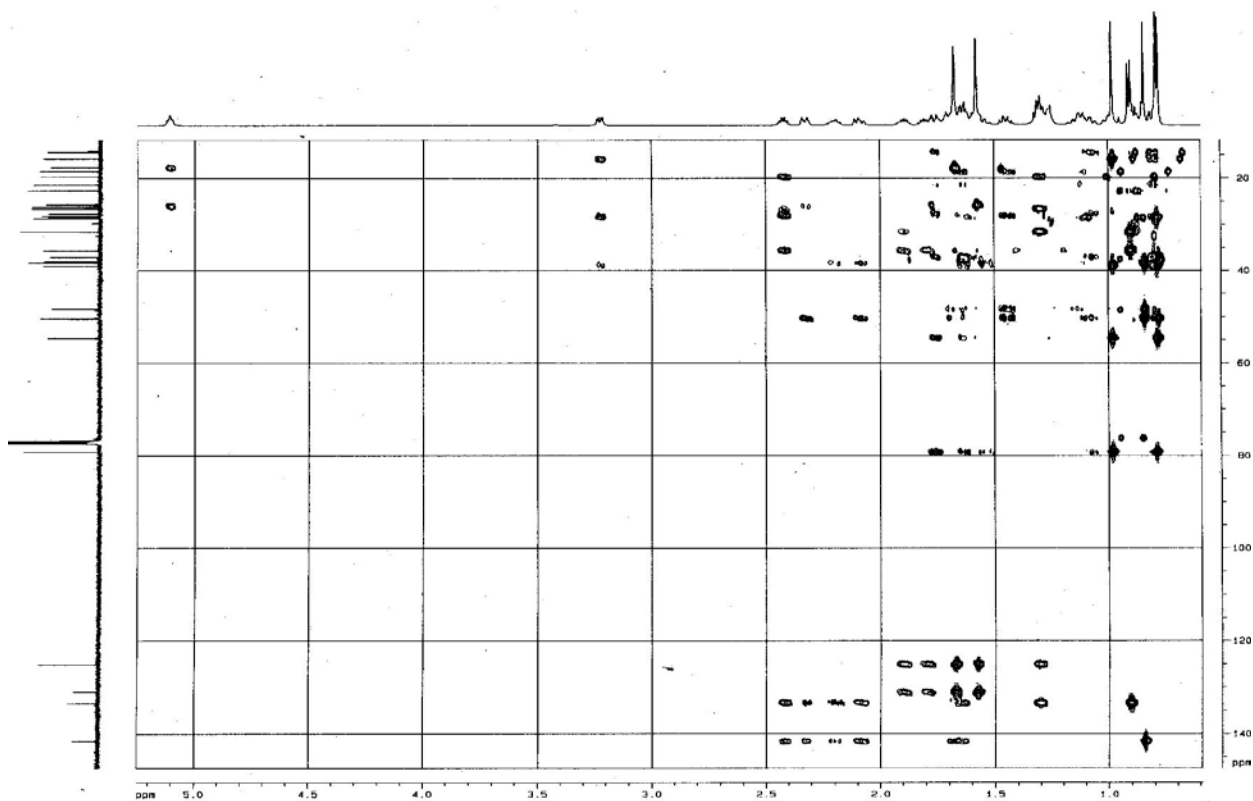

**Fig. S3.7.** HMBC spectrum of product **21** in  $\text{CDCl}_3$ .

**Product 21 from (3S)-27-norOXSQ 21**

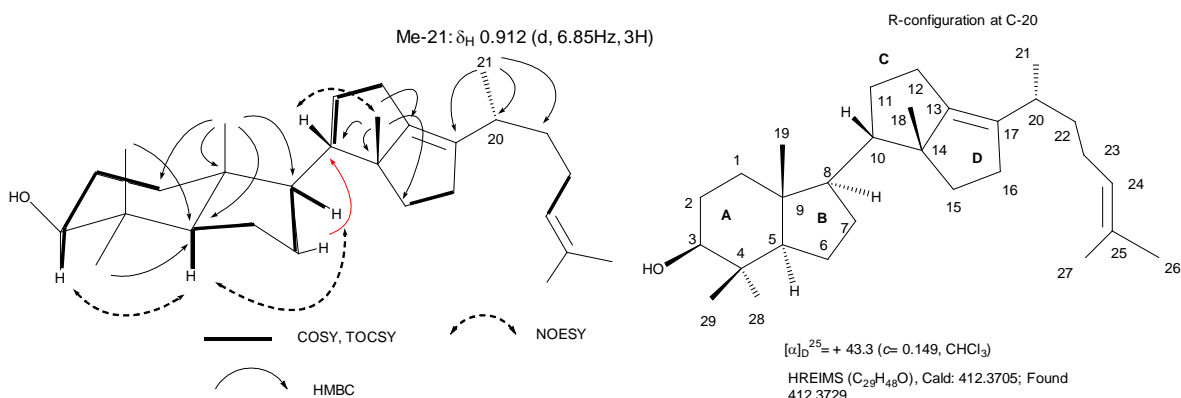

600 MHz, in  $\text{CDCl}_3$ ; the residual solvent peak:  $\delta_{\text{H}}$  7.26;  $\delta_{\text{C}}$  77.0 ppm

| NO. | $^1\text{H}$                   | $^{13}\text{C}$ | NO. | $^1\text{H}$            | $^{13}\text{C}$  | NO. | $^1\text{H}$           | $^{13}\text{C}$ | NO. | $^1\text{H}$  | $^{13}\text{C}$ |
|-----|--------------------------------|-----------------|-----|-------------------------|------------------|-----|------------------------|-----------------|-----|---------------|-----------------|
| 1   | 1.07(m,1H);1.77(m,1H)          | <b>38.02(t)</b> | 9   | —                       | <b>37.01(s)</b>  | 17  | —                      | <b>133.4(s)</b> | 25  | —             | <b>130.9(s)</b> |
| 2   | 1.55(m);1.62(m)                | <b>27.67(t)</b> | 10  | 1.12(m,1H)              | <b>48.20(d)</b>  | 18  | 0.846(s,3H)            | <b>18.50(q)</b> | 26  | 1.675(s,3H)   | <b>22.72(q)</b> |
| 3   | 3.23(dd, J=11.7 Hz;4.2 Hz, 1H) | <b>79.18(d)</b> | 11  | 0.90(m,1H); 1.70(m,1H)  | <b>26.11(t)</b>  | 19  | 0.783(s,3H)            | <b>14.35(q)</b> | 27  | 1.578 (s, 3H) | <b>17.67(q)</b> |
| 4   | —                              | <b>38.95(s)</b> | 12  | 1.70(m,1H); 2.32(m,1H)  | <b>22.71(t)</b>  | 20  | 2.42(m, 1H)            | <b>31.59(d)</b> | 28  | 0.985(s,3H)   | <b>28.42(q)</b> |
| 5   | 0.81(m, 1H)                    | <b>54.61(d)</b> | 13  | —                       | <b>141.6(s)</b>  | 21  | 0.912(d, 6.85Hz, 3H)   | <b>19.66(q)</b> | 29  | 0.793(s,3H)   | <b>15.79(q)</b> |
| 6   | 1.26(m,1H); 1.60(m, 1H)        | <b>21.42(t)</b> | 14  | —                       | <b>50.32 (s)</b> | 22  | 1.31 (m, 2H)           | <b>35.61(t)</b> |     |               |                 |
| 7   | 1.12(m,1H); 1.63(m,1H)         | <b>28.63(t)</b> | 15  | 1.45(m,1H); 1.63(m, 1H) | <b>38.26(t)</b>  | 23  | 1.80(m,1H); 1.89(m,1H) | <b>26.58(t)</b> |     |               |                 |
| 8   | 1.00 (m, 1H)                   | <b>50.30(d)</b> | 16  | 2.08(m,1H); 2.19(m,1H)  | <b>28.17(t)</b>  | 24  | 5.11(brs, 1H)          | <b>125.1(d)</b> |     |               |                 |

**Fig. S3.8.** Assignments of NMR data of product **21** in  $\text{CDCl}_3$ , HR-EIMS and optical rotation.

#### 4. NMR spectra of product 21 in C<sub>6</sub>D<sub>6</sub>.

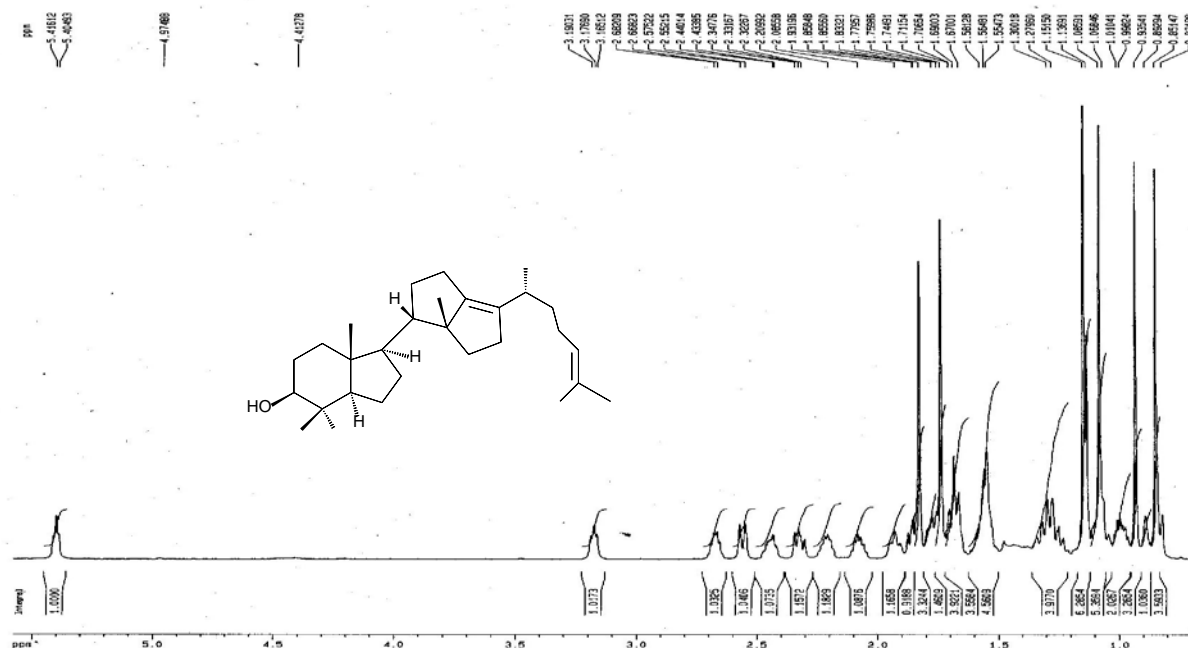

**Fig. S4.1.** <sup>1</sup>H NMR spectra of product **21** in C<sub>6</sub>D<sub>6</sub> (600 MHz).

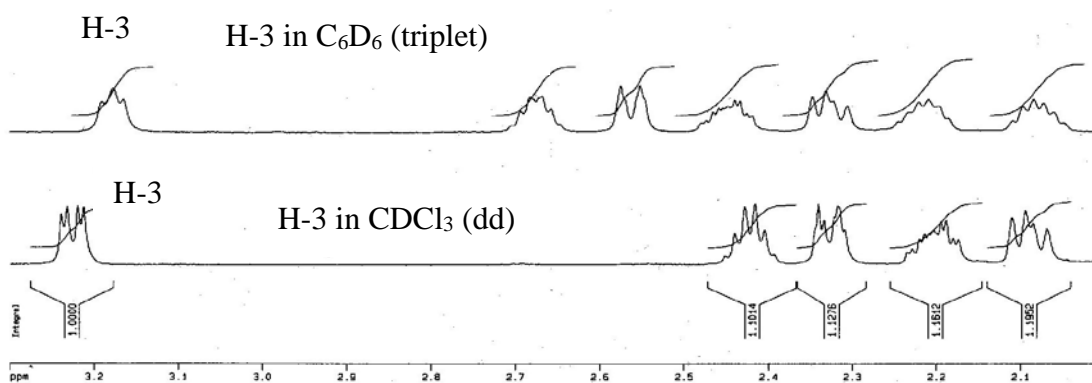

**Fig. S4.2.** Comparison of <sup>1</sup>H NMR spectra of product **21** between CDCl<sub>3</sub> and C<sub>6</sub>D<sub>6</sub> solutions (600 MHz).

The coupling constants of H-3 were compared between the solutions of C<sub>6</sub>D<sub>6</sub> and CDCl<sub>3</sub>.  $\delta_{\text{H}}$  in C<sub>6</sub>D<sub>6</sub>: 3.18 (br t,  $J=8.0$  Hz);  $\delta_{\text{H}}$  in CDCl<sub>3</sub>: 3.23 ((dd,  $J=11.7$  Hz and 4.2 Hz). The coupling constants (splitting pattern) in CDCl<sub>3</sub> solution clearly demonstrated that the OH group is  $\beta$ -oriented, although the splitting pattern (triplet) in C<sub>6</sub>D<sub>6</sub> suggests that the OH group is  $\alpha$ -oriented. This contradictory argument was resolved by the definitive NOE between H-3 and H-5 in the C<sub>6</sub>D<sub>6</sub> solution. Consequently, the OH at C-3 of product **1** was credibly determined to be  $\beta$ -oriented. The <sup>1</sup>H-NMR spectra of products **23** and **25** in C<sub>6</sub>D<sub>6</sub> solution also showed triplet splitting pattern, but dd splitting in the CDCl<sub>3</sub> solution.

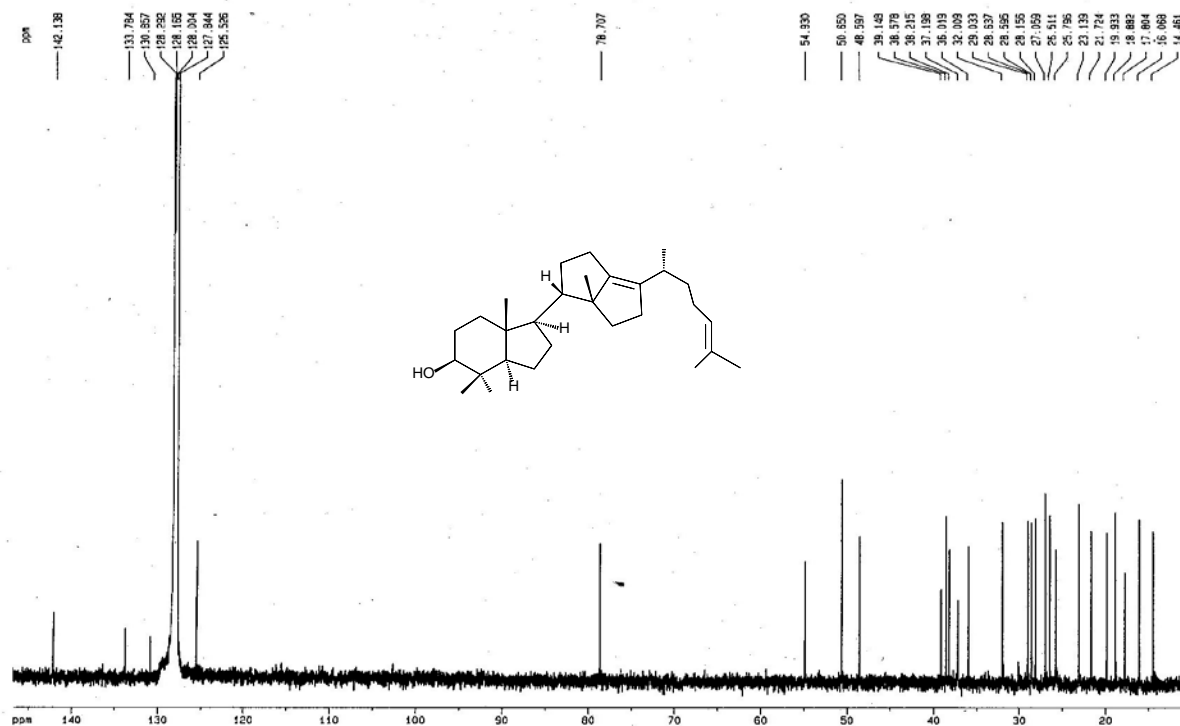

Fig. S4.3.  $^{13}\text{C}$  NMR spectrum of product **21** in  $\text{C}_6\text{D}_6$  (150 MHz).

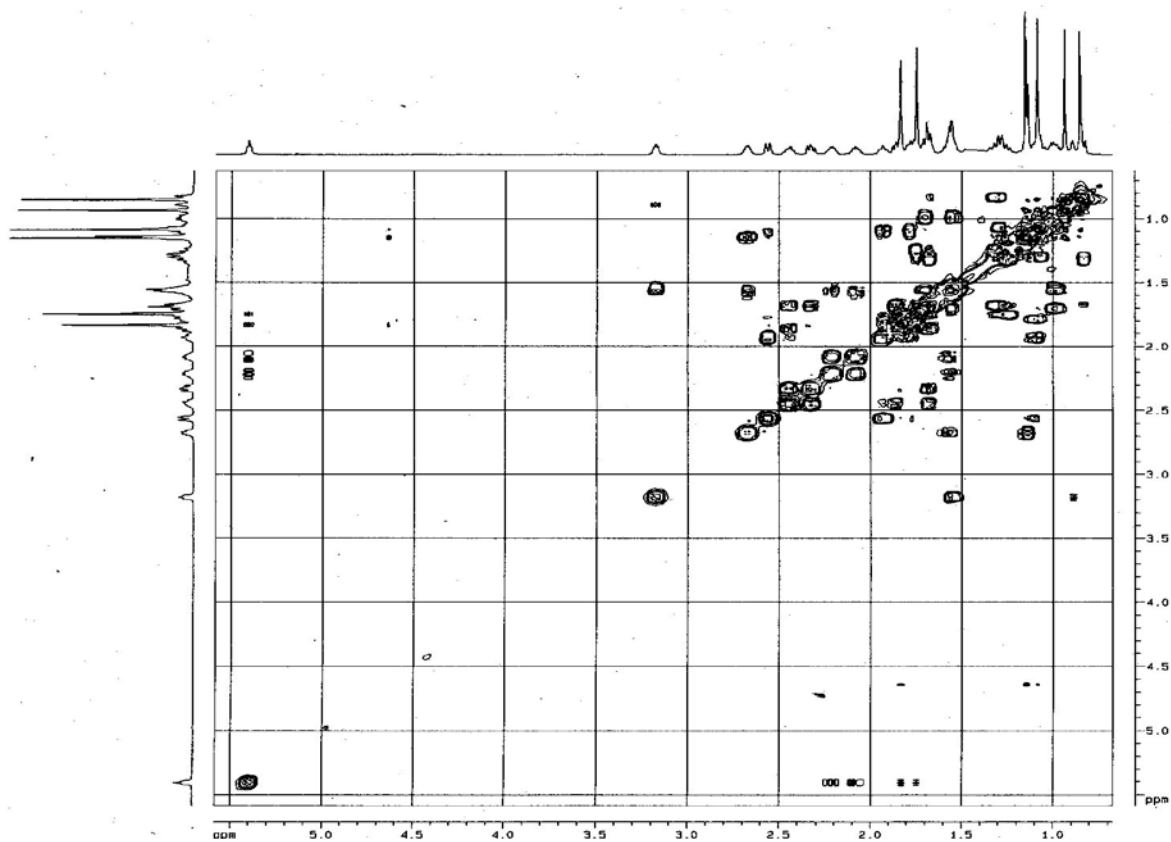

Fig. S4.4.  $^1\text{H}$ - $^1\text{H}$  COSY spectrum of product **21** in  $\text{C}_6\text{D}_6$ .

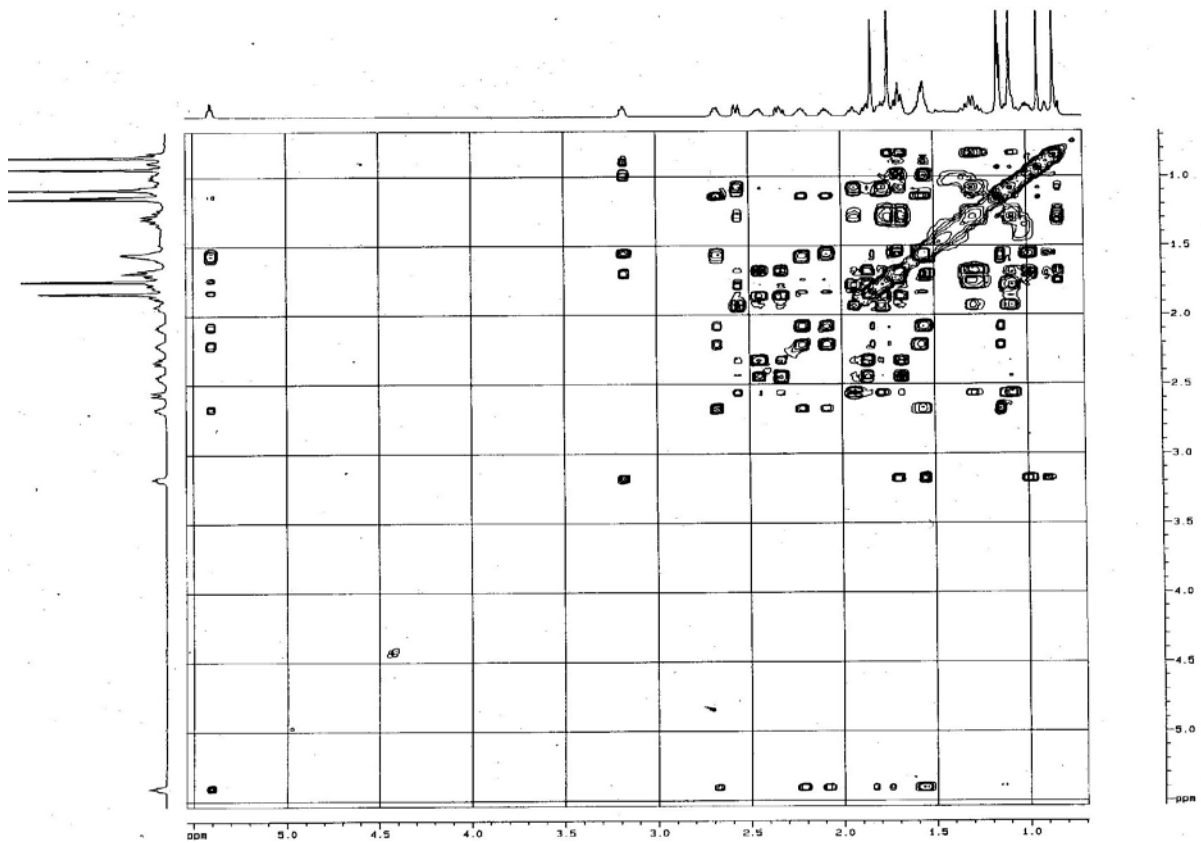

Fig. S4.5. TOCSY spectrum of product **21** in  $C_6D_6$ .

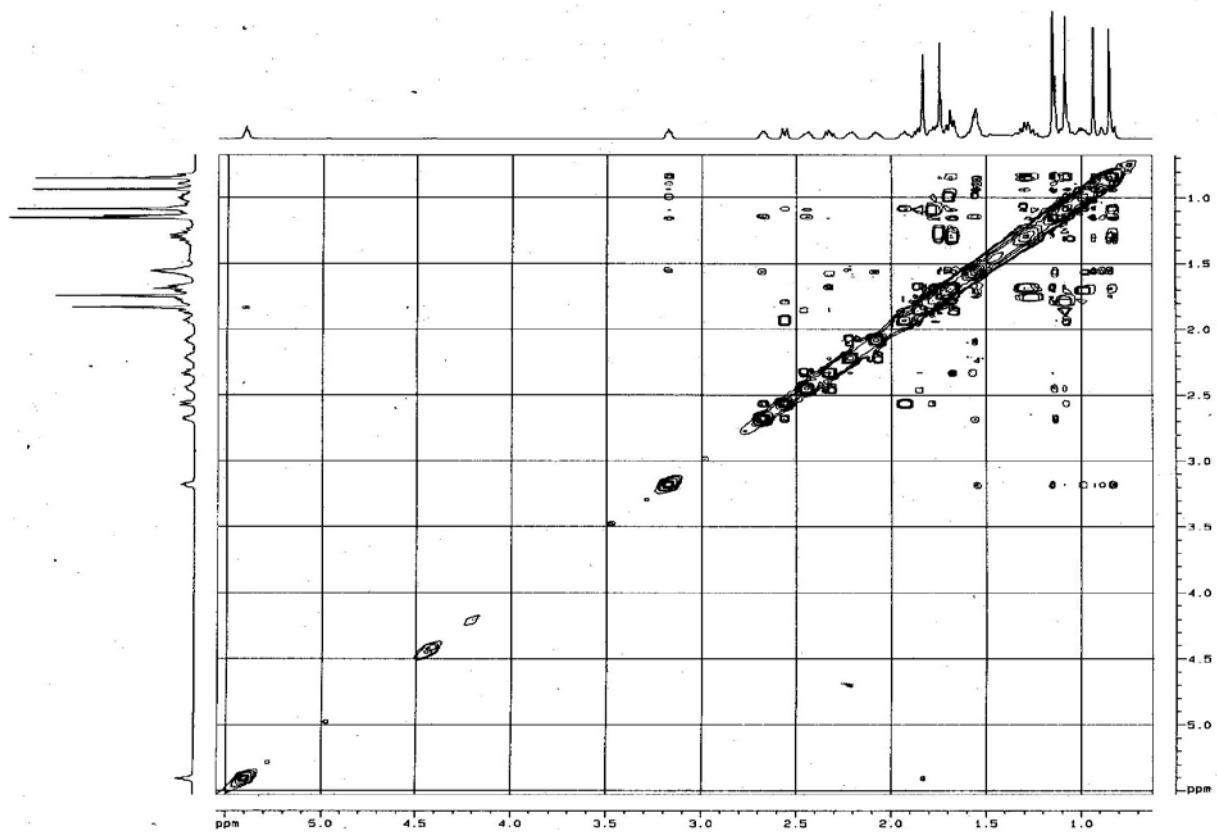

Fig. S4.6. NOESY spectrum of product **21** in  $C_6D_6$ .

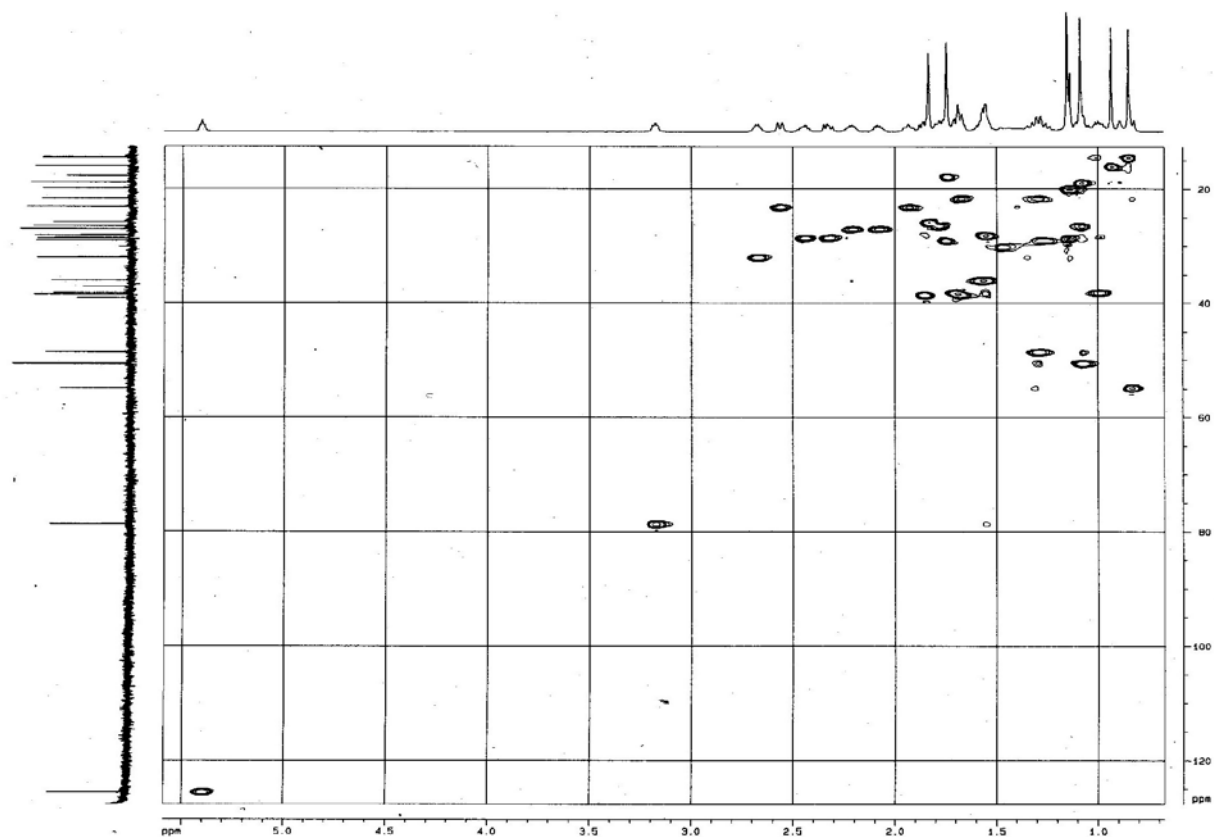

Fig. S4.7. HSQC spectrum of product **21** in C<sub>6</sub>D<sub>6</sub>.

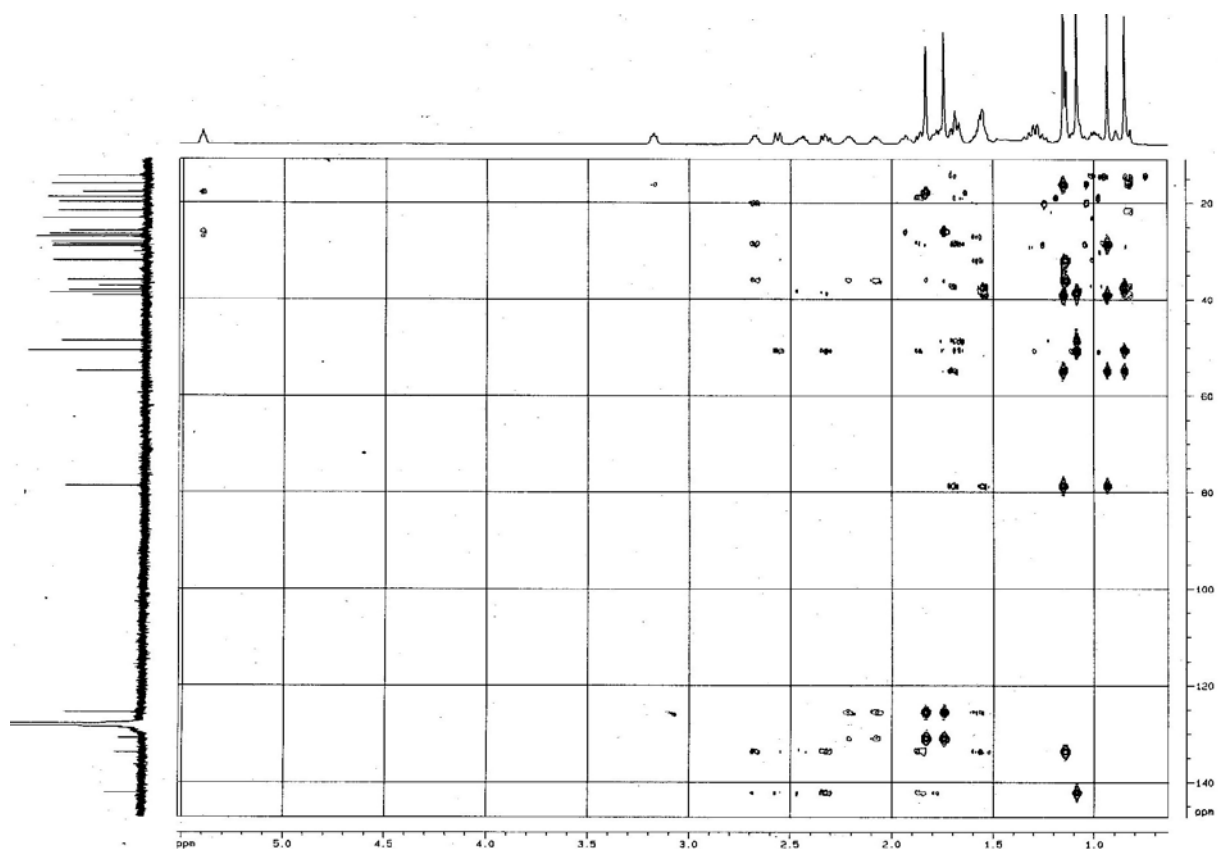

Fig. S4.8. HMBC spectrum of product **21** in C<sub>6</sub>D<sub>6</sub>.

Product **21** in C<sub>6</sub>D<sub>6</sub>

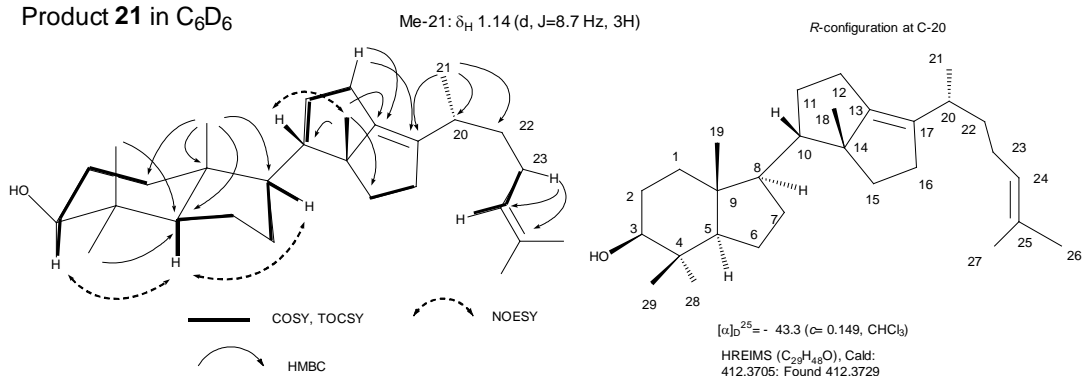

600 MHz, in C<sub>6</sub>D<sub>6</sub>; the residual solvent peak:  $\delta_H$  7.26;  $\delta_C$  77.0 ppm

| NO. | <sup>1</sup> H            | <sup>13</sup> C | NO. | <sup>1</sup> H                      | <sup>13</sup> C  | NO. | <sup>1</sup> H           | <sup>13</sup> C | NO. | <sup>1</sup> H | <sup>13</sup> C |
|-----|---------------------------|-----------------|-----|-------------------------------------|------------------|-----|--------------------------|-----------------|-----|----------------|-----------------|
| 1   | 1.00(m,1H); 1.68(m,1H)    | <b>38.21(t)</b> | 9   | —                                   | <b>37.20(s)</b>  | 17  | —                        | <b>133.8(s)</b> | 25  | —              | <b>130.9(s)</b> |
| 2   | 1.54(m, 2H)               | <b>28.16(t)</b> | 10  | 1.29(m, 1H)                         | <b>48.60(d)</b>  | 18  | 1.068(s, 3H)             | <b>18.88(q)</b> | 26  | 1.833(s, 3H)   | <b>25.80(q)</b> |
| 3   | 3.18(bt, J=6.7 Hz, 1H)    | <b>78.71(d)</b> | 11  | 1.26(m, 1H); 1.74(m, 1H)            | <b>29.03(t)</b>  | 19  | 0.851(s, 3H)             | <b>14.46(q)</b> | 27  | 1.745 (s, 3H)  | <b>17.80(q)</b> |
| 4   | —                         | <b>39.15(s)</b> | 12  | 1.93(m, 1H); 2.56(bd, J=13.2Hz, 1H) | <b>23.14(t)</b>  | 20  | 2.67(m, 1H)              | <b>32.01(d)</b> | 28  | 1.151(s, 3H)   | <b>28.64(q)</b> |
| 5   | 0.81 (m, 1H)              | <b>54.93(d)</b> | 13  | —                                   | <b>142.1(s)</b>  | 21  | 1.14 (d, J=7.2 Hz, 3H)   | <b>19.93(q)</b> | 29  | 0.935(s, 3H)   | <b>16.07(q)</b> |
| 6   | 1.31(m, 1H); 1.67 (m, 1H) | <b>21.73(t)</b> | 14  | —                                   | <b>50.65 (s)</b> | 22  | 1.55(m, 2H)              | <b>36.02(t)</b> |     |                |                 |
| 7   | 1.09(m, 1H); 1.78(m, 1H)  | <b>26.51(t)</b> | 15  | 1.57(m, 1H); 1.85(m, 1H)            | <b>38.58(t)</b>  | 23  | 2.08(m, 1H); 2.20(m, 1H) | <b>27.06(t)</b> |     |                |                 |
| 8   | 1.07 (m, 1H)              | <b>50.65(d)</b> | 16  | 2.32(m, 1H); 2.44(m, 1H)            | <b>28.59(t)</b>  | 24  | 5.40(bt, J=6.7 Hz, 1H)   | <b>125.5(d)</b> |     |                |                 |

**Fig. S4.9.** Assignments of NMR data of product **21** in C<sub>6</sub>D<sub>6</sub>, HR-EIMS and optical rotation.

## 5. NMR spectra of product 23 in C<sub>6</sub>D<sub>6</sub>.

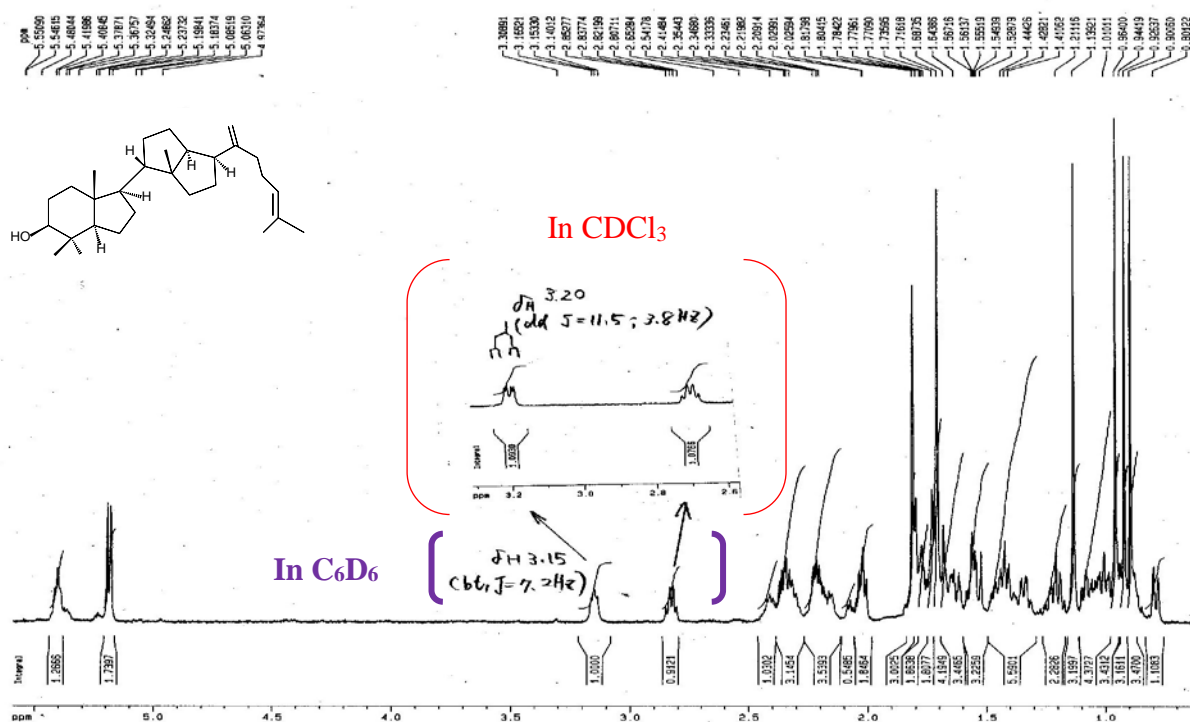

Fig. S5.1. <sup>1</sup>H NMR spectrum of product 23.

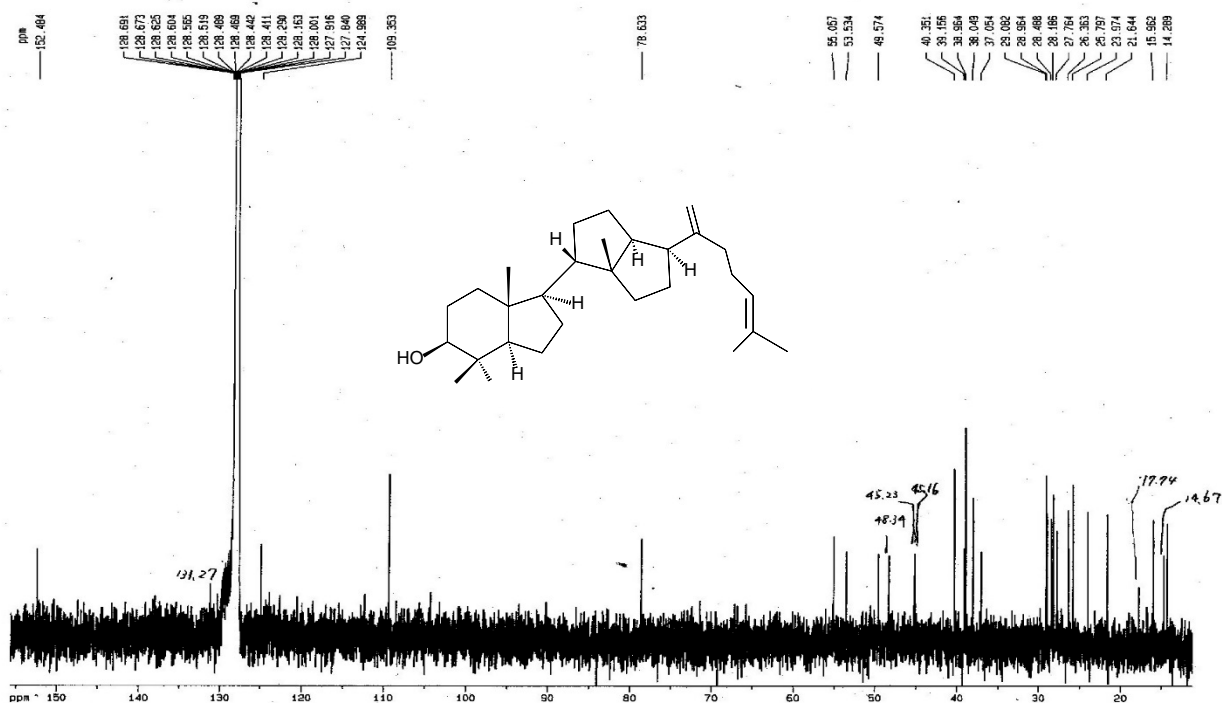

Fig. S5.2. <sup>13</sup>C NMR spectrum of product 23.

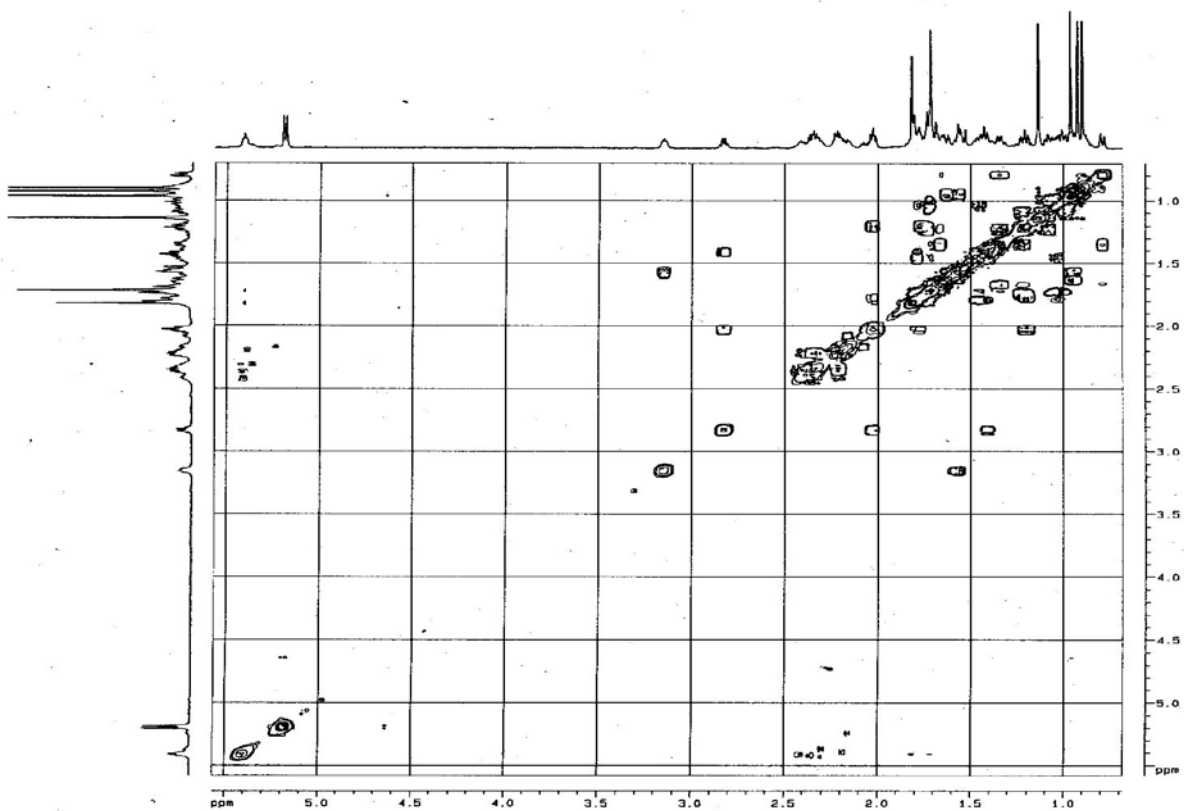

Fig. S5.3. COSY spectrum of product **23**.

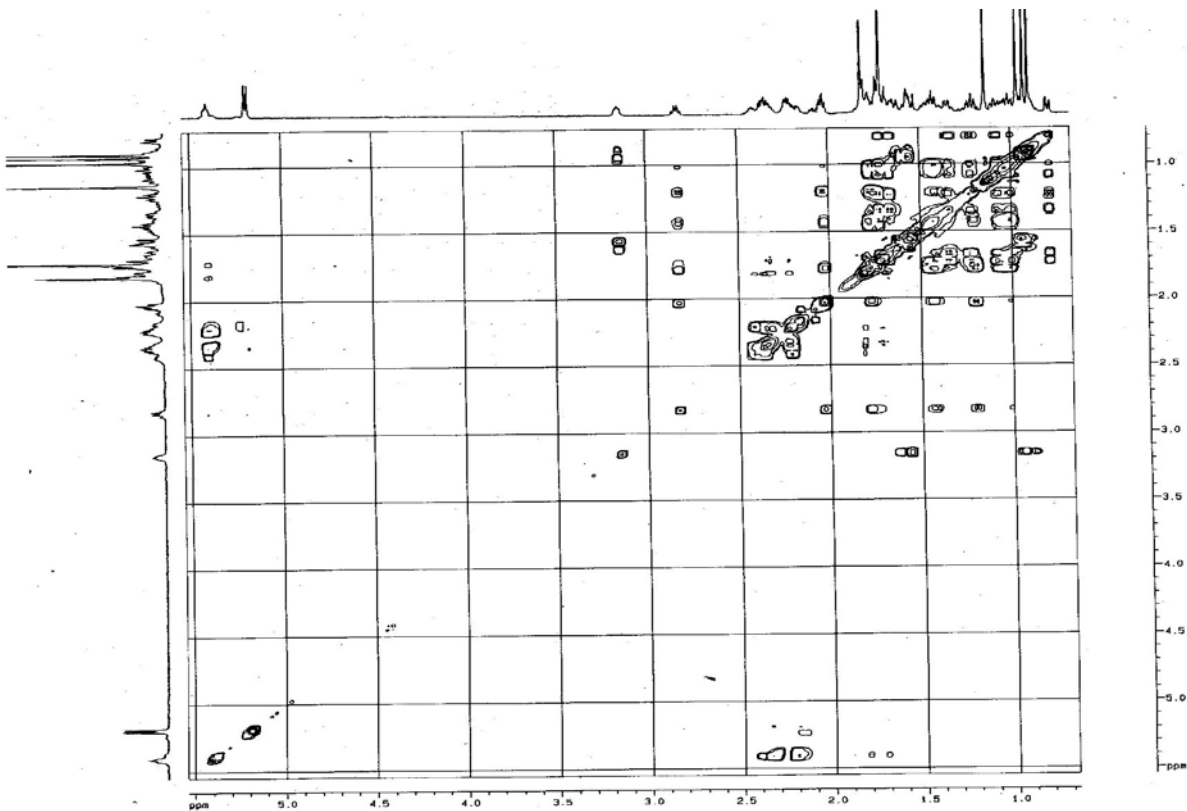

Fig. S5.4. TOCSY spectrum of product **23**



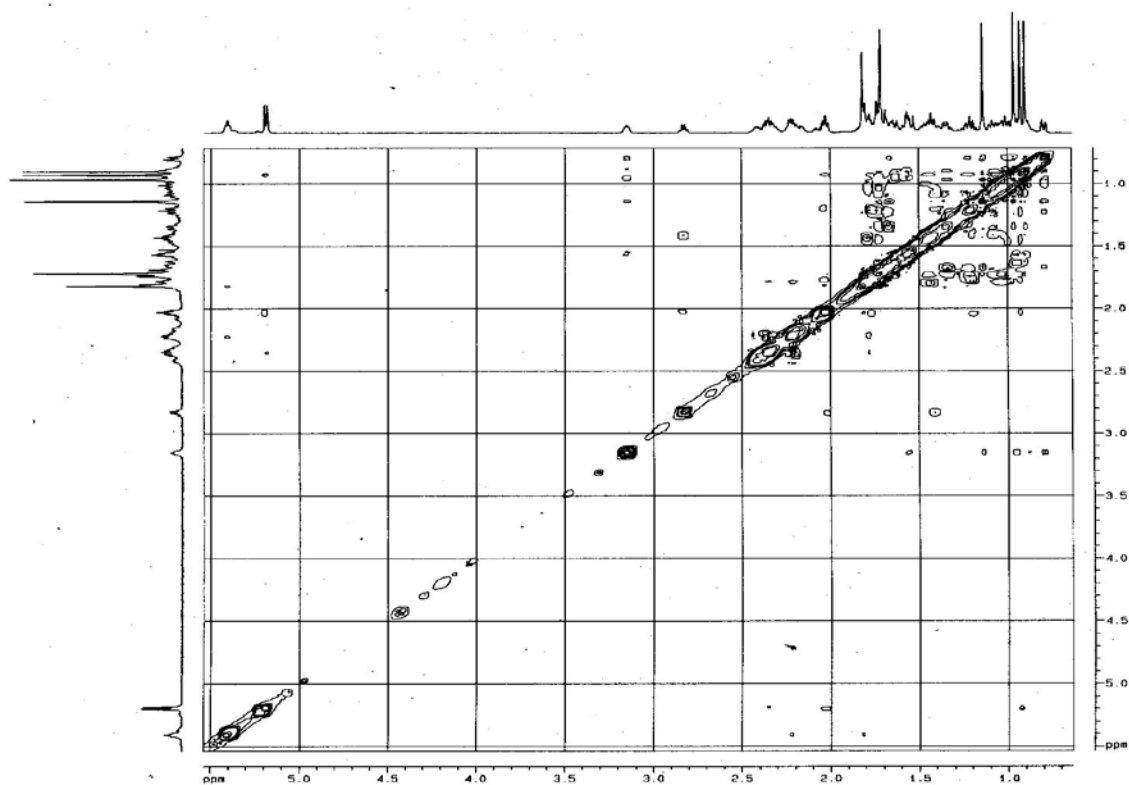

Fig. S5.5. NOESY spectrum of product 23.

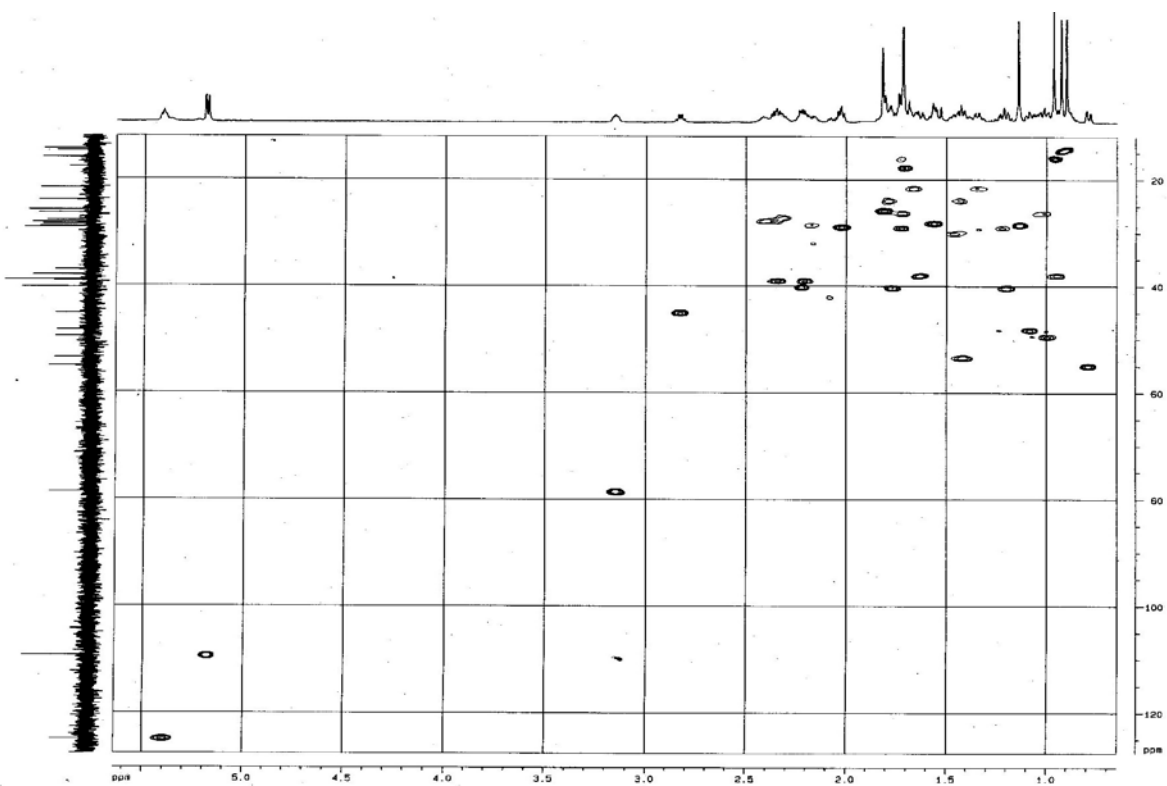

Fig. S5.6. HSQC spectrum of product 23.

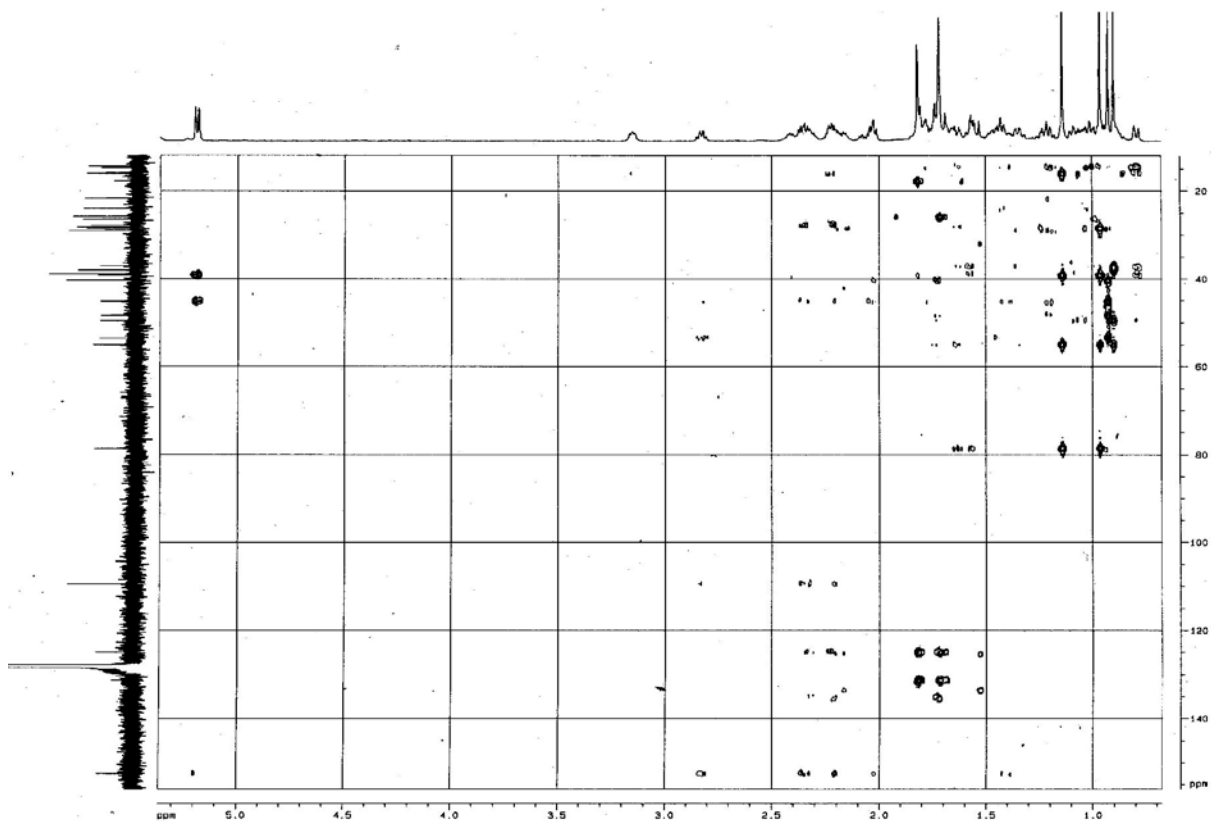

Fig. S5.7. HMBC spectrum of product **23**.

**Product 23**

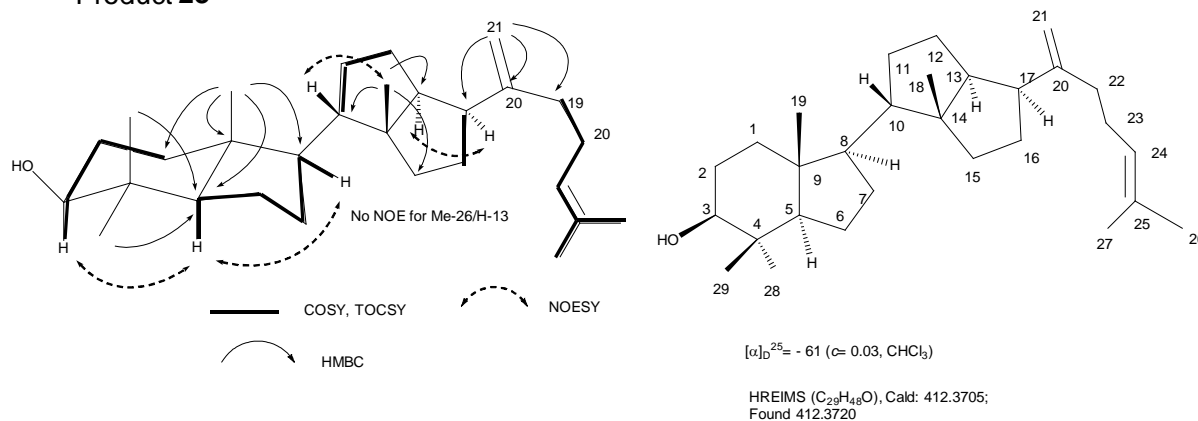

600 MHz, in  $\text{C}_6\text{D}_6$ ; the residual solvent peak:  $\delta_{\text{H}}$  7.28;  $\delta_{\text{C}}$  128.0 ppm

| NO. | $^1\text{H}$                  | $^{13}\text{C}$ | NO. | $^1\text{H}$            | $^{13}\text{C}$  | NO. | $^1\text{H}$              | $^{13}\text{C}$ | NO. | $^1\text{H}$  | $^{13}\text{C}$ |
|-----|-------------------------------|-----------------|-----|-------------------------|------------------|-----|---------------------------|-----------------|-----|---------------|-----------------|
| 1   | 0.94(m,1H);1.62(m,1H)         | <b>38.05(t)</b> | 9   | —                       | <b>37.05(s)</b>  | 17  | 2.83(dt, J=9.0 Hz, 1H)    | <b>45.16(d)</b> | 25  | —             | <b>131.3(s)</b> |
| 2   | 1.56 (m, 2H)                  | <b>28.19(t)</b> | 10  | 1.08(m, 1H)             | <b>48.34(d)</b>  | 18  | 0.926(s, 3H)              | <b>14.67(q)</b> | 26  | 1.818(s, 3H)  | <b>25.80(q)</b> |
| 3   | 3.15 (br t, J=7.2 Hz, 1H)     | <b>78.63(d)</b> | 11  | 1.02(m, 1H); 1.72(m,1H) | <b>26.36(t)</b>  | 19  | 0.901(s, 3H)              | <b>14.29(q)</b> | 27  | 1.716 (s, 3H) | <b>17.74(q)</b> |
| 4   | —                             | <b>39.16(s)</b> | 12  | 1.43(m,1H); 1.78(m,1H)  | <b>23.97(t)</b>  | 20  | —                         | <b>152.5(s)</b> | 28  | 1.14(s,3H)    | <b>28.49(q)</b> |
| 5   | 0.794(dd, J=11.8; 2.1 Hz, 1H) | <b>55.06(d)</b> | 13  | 1.42 (m, 1H)            | <b>53.53(d)</b>  | 21  | 5.18 (s, 1H); 5.20(s, 1H) | <b>109.3(t)</b> | 29  | 0.964(s,3H)   | <b>15.97(q)</b> |
| 6   | 1.34(m,1H); 1.67(m, 1H)       | <b>21.64(t)</b> | 14  | —                       | <b>45.23 (s)</b> | 22  | 2.21(m); 2..33(m)         | <b>38.96(t)</b> |     |               |                 |
| 7   | 1.22(m, 1H); 1.73(m, 1H)      | <b>29.08(t)</b> | 15  | 1.20(m,1H); 1.77(m, 1H) | <b>40.35(t)</b>  | 23  | 2.36(m,1H); 2.41(m,1H)    | <b>27.76(t)</b> |     |               |                 |
| 8   | 1.00 (m, 1H)                  | <b>49.57(d)</b> | 16  | 2.03(m,2H)              | <b>28.96(t)</b>  | 24  | 5.41(t, J=6.8 Hz, 1H)     | <b>125.0(d)</b> |     |               |                 |

**Fig. S5.8.** Assignments of NMR data of product **23** in  $\text{C}_6\text{D}_6$ , HR-EIMS and optical rotation.

Remark; In the  $\text{C}_6\text{D}_6$  solution, the H-3 showed br triplet splitting pattern, but in the  $\text{CDCl}_3$  solution, H-3 showed the dd splitting pattern ( $\delta_{\text{H}}$  3.20, dd,  $J=11.5$  and 3.8 Hz, see Fig. S6.1), thus strongly indicating that the OH at C-3 is positioned in a  $\beta$ -orientation. A definitive NOE for H-3/H-5 further supported  $\beta$ -OH orientation at C-3 in the NOESY spectrum ( $\text{C}_6\text{D}_6$  solution). (See Fig. S6.5).

## 6. NMR spectra of product 25 in C<sub>6</sub>D<sub>6</sub>.

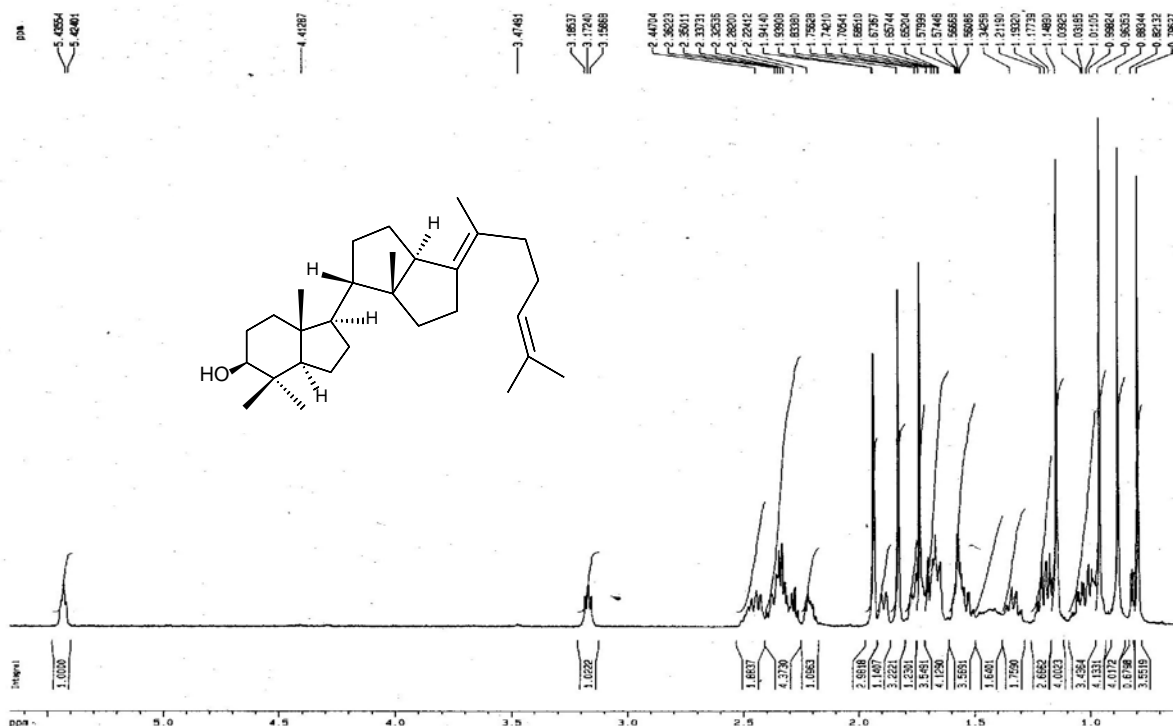

**Fig. S6.1.** <sup>1</sup>H NMR spectrum of product **25**

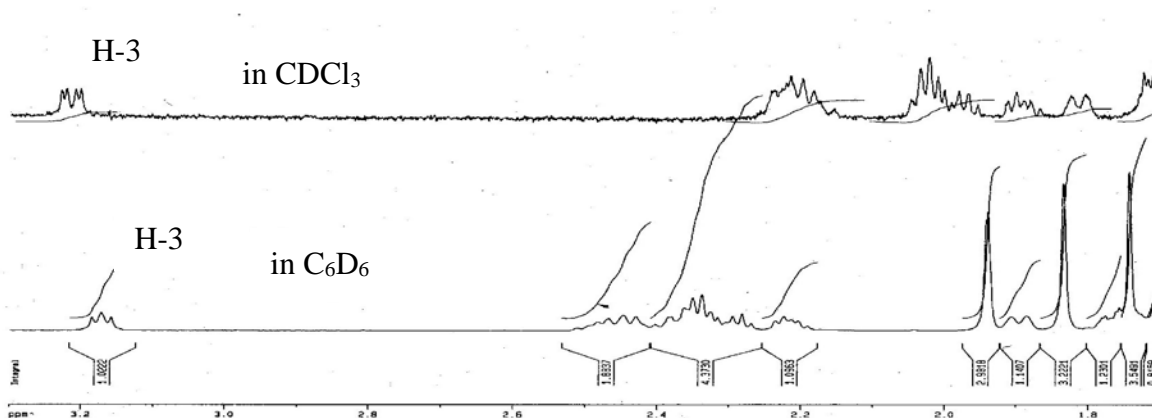

**Fig. S6.2.** Comparison of <sup>1</sup>H NMR spectra of product **25** between CDCl<sub>3</sub> and C<sub>6</sub>D<sub>6</sub> solutions (600 MHz).

The coupling constants of H-3 were compared between the solutions of C<sub>6</sub>D<sub>6</sub> and CDCl<sub>3</sub>.

$\delta_{\text{H}}$  in C<sub>6</sub>D<sub>6</sub>: 3.17 (br t,  $J=8.0$  Hz);  $\delta_{\text{H}}$  in CDCl<sub>3</sub>: 3.21 (dd,  $J=11.7$  Hz and 4.3 Hz). The coupling constants (splitting pattern) in CDCl<sub>3</sub> solution clearly demonstrated that the OH group is  $\beta$ -oriented, although the splitting pattern (triplet) in C<sub>6</sub>D<sub>6</sub> suggests that the OH group is  $\alpha$ -oriented. This contradictory argument was resolved by the definitive NOE between H-3 and H-5 in the C<sub>6</sub>D<sub>6</sub> solution. Consequently, the OH at C-3 of product **25** was credibly determined to be  $\beta$ -oriented. The <sup>1</sup>H-NMR spectra of products **21** and **23** in C<sub>6</sub>D<sub>6</sub> solution also triplet splitting pattern, but dd splitting in CDCl<sub>3</sub>.

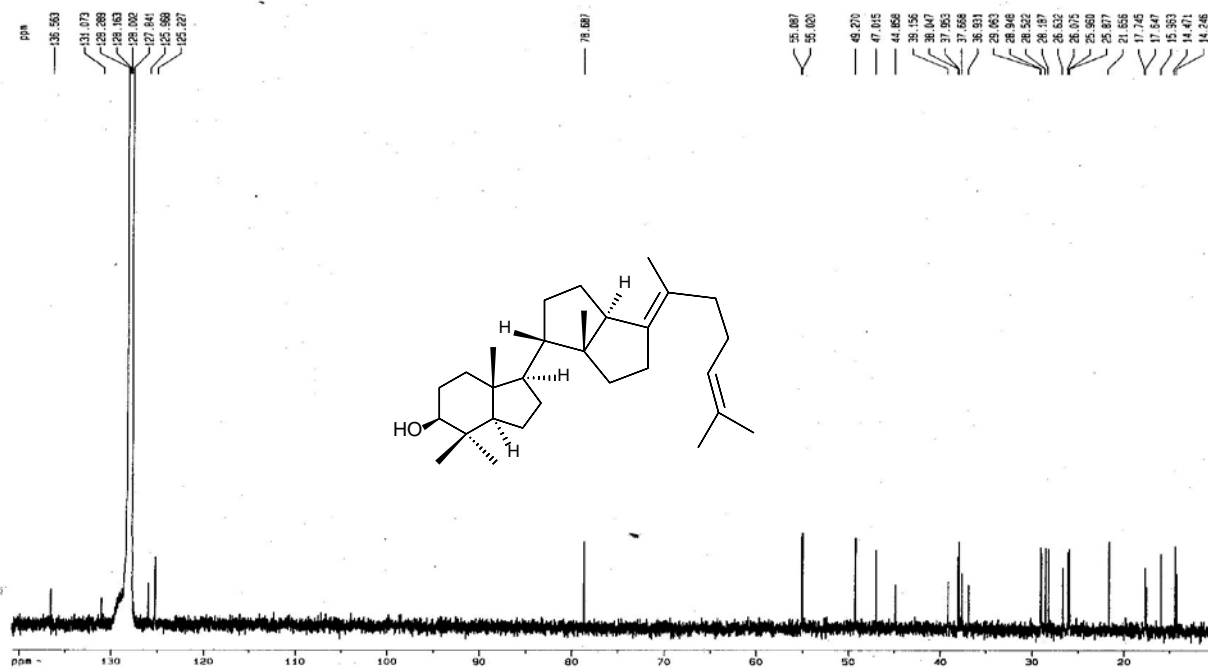

Fig. S6.3.  $^{13}\text{C}$  NMR spectrum of product 25

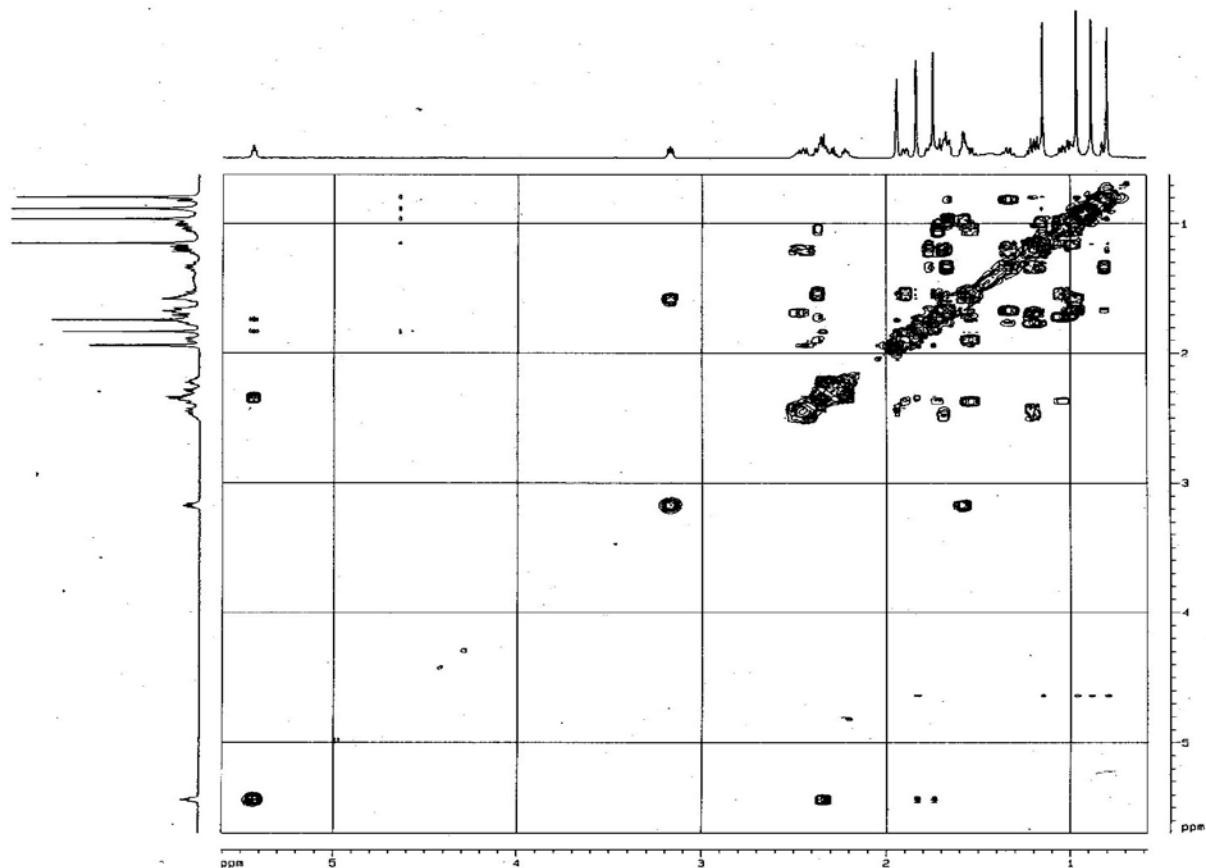

Fig. S6.4. COSY spectrum of product 25

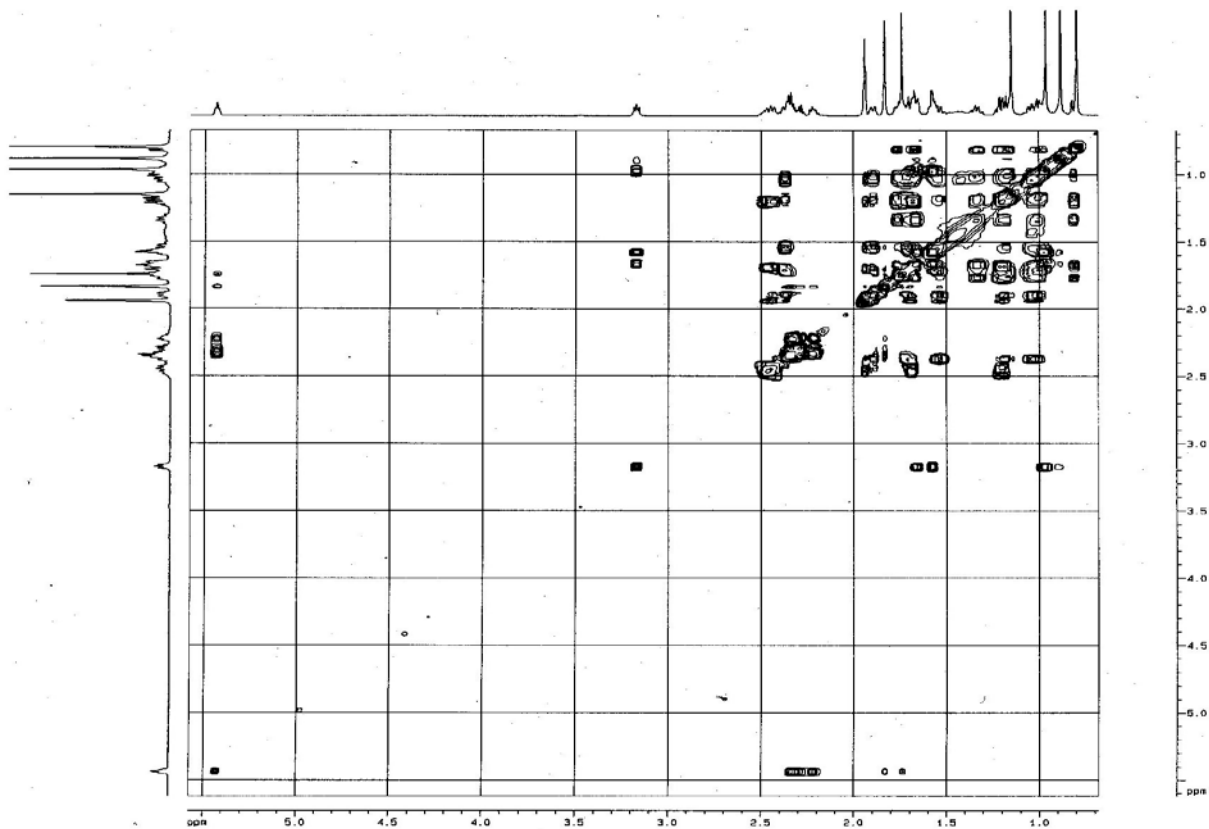

Fig. S6.5. TOCSY spectrum of product 25

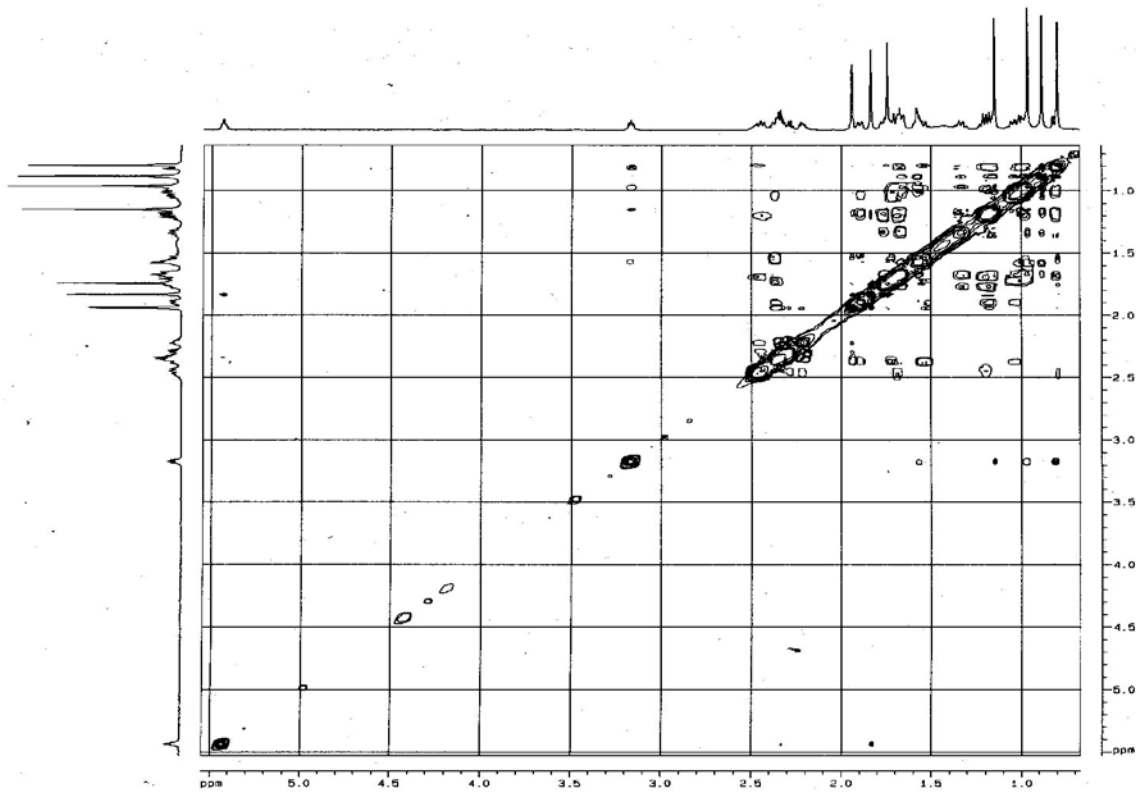

Fig. S6.6. NOESY spectrum of product 25

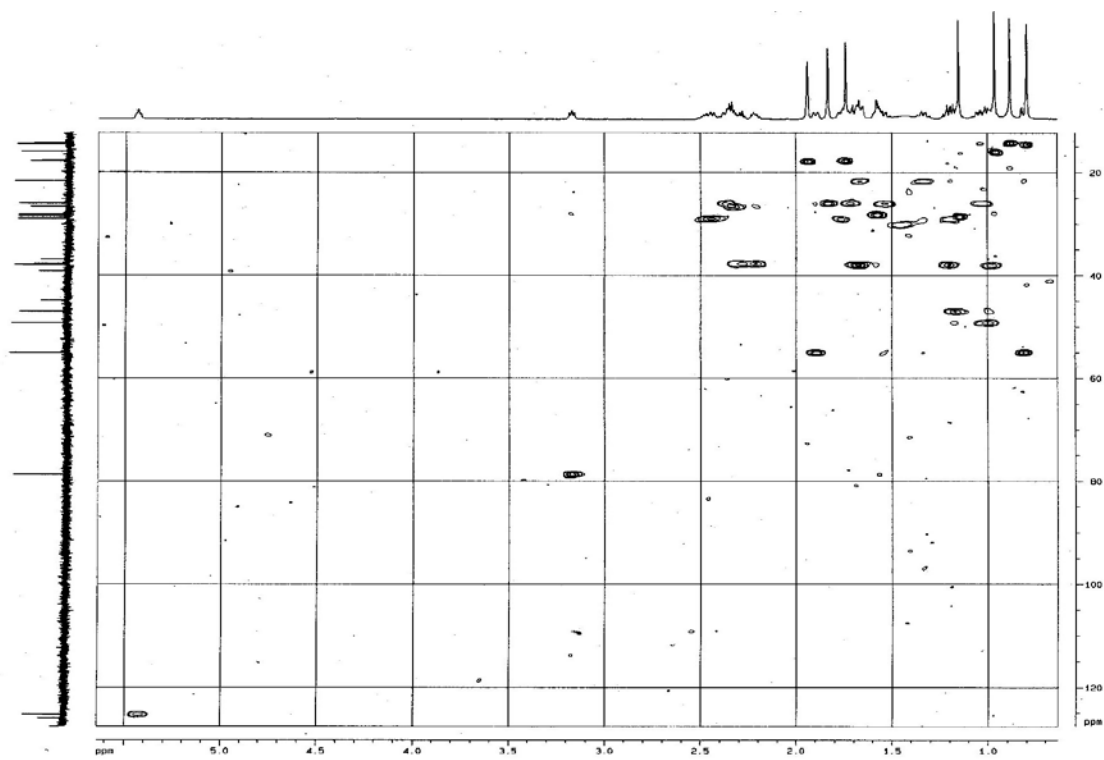

Fig. S6.7. HSQC spectrum of product 25

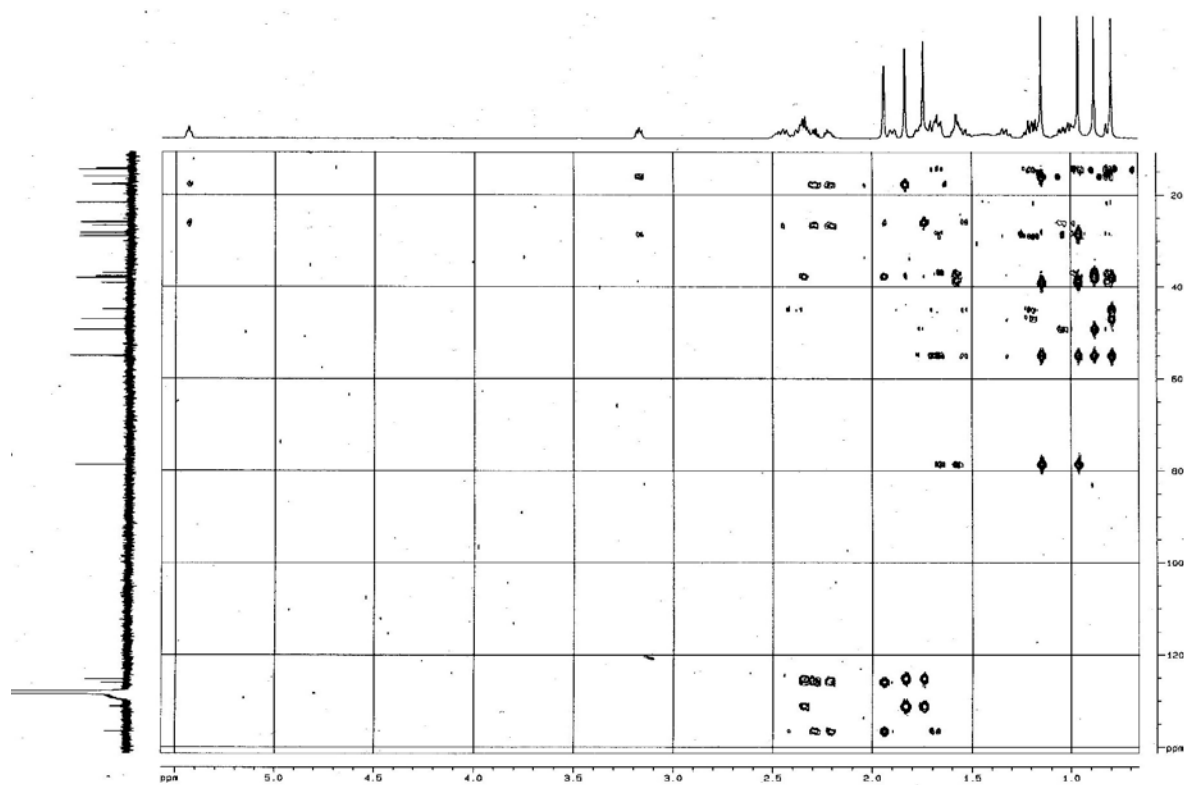

Fig. S6.8. HMBC spectrum of product 25

**Fig. S6.9.** Assignments of NMR data of product **25** in C<sub>6</sub>D<sub>6</sub>, HR-EIMS and optical rotation.

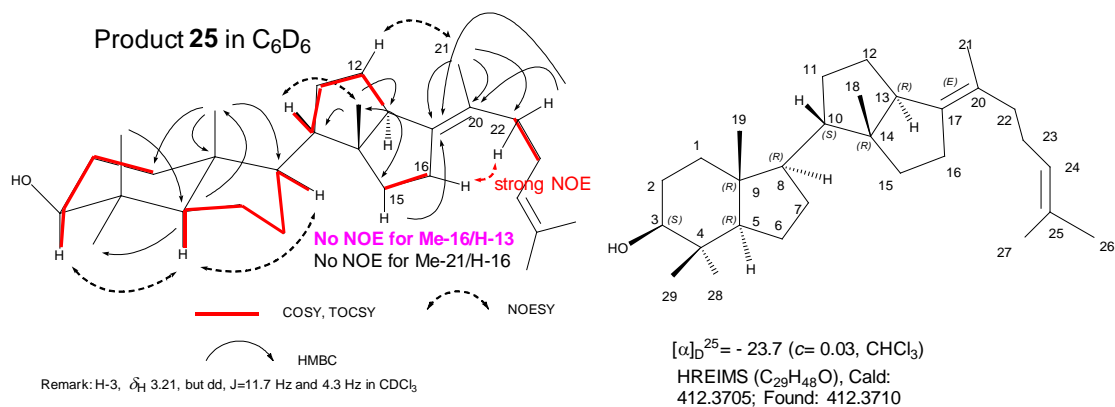

600 MHz, in C<sub>6</sub>D<sub>6</sub>; the residual solvent peak:  $\delta_{\text{H}}$  7.28;  $\delta_{\text{C}}$  128.0 ppm

| NO. | <sup>1</sup> H           | <sup>13</sup> C             | NO. | <sup>1</sup> H           | <sup>13</sup> C             | NO. | <sup>1</sup> H          | <sup>13</sup> C | NO. | <sup>1</sup> H | <sup>13</sup> C |
|-----|--------------------------|-----------------------------|-----|--------------------------|-----------------------------|-----|-------------------------|-----------------|-----|----------------|-----------------|
| 1   | 0.97(m,1H);1.68(m,1H)    | <b>37.95(t)</b>             | 9   | —                        | <b>36.93(s)</b>             | 17  | —                       | <b>136.6(s)</b> | 25  | —              | <b>131.0(s)</b> |
| 2   | 1.57(m,2H)               | <b>28.19(t)</b>             | 10  | 1.16 (m, 1H)             | <b>42.01(d)</b>             | 18  | 0.796(s,3H)             | <b>14.47(q)</b> | 26  | 1.834 (s, 3H)  | <b>25.96(q)</b> |
| 3   | 3.17 (bt, J=8.0 Hz, 1H)  | <b>78.69(d)</b>             | 11  | 1.02(m, 1H); 1.72(m,1H)  | <b>25.88(t)</b>             | 19  | 0.883(s,3H)             | <b>14.24(q)</b> | 27  | 1.742(s,3H)    | <b>17.65(q)</b> |
| 4   | —                        | <b>39.16(s)</b>             | 12  | 1.55(m,1H); 2.35(m,1H)   | <b>26.07(t)</b>             | 20  | —                       | <b>125.9(s)</b> | 28  | 1.489(s,3H)    | <b>28.52(q)</b> |
| 5   | 0.82(m, 1H)              | <b>55.09(d)<sup>a</sup></b> | 13  | 1.90 (bd, J=13.0 Hz, 1H) | <b>55.02(d)<sup>a</sup></b> | 21  | 1.940 (bs, 3H)          | <b>17.74(q)</b> | 29  | 0.963(s,3H)    | <b>15.93(q)</b> |
| 6   | 1.33(m,1H); 1.67(m, 1H)  | <b>21.65(t)</b>             | 14  | —                        | <b>44.85 (s)</b>            | 22  | 2.21(m, 1H);2.30(m, 1H) | <b>37.68(t)</b> |     |                |                 |
| 7   | 1.20(m, 1H); 1.77(m, 1H) | <b>29.06(t)</b>             | 15  | 1.20(m,1H); 1.68(m, 1H)  | <b>38.05(t)</b>             | 23  | 2.35 (m, 2H)            | <b>26.93(t)</b> |     |                |                 |
| 8   | 1.00(m, 1H)              | <b>49.27(d)</b>             | 16  | 2.45(m,2H)               | <b>28.95(t)</b>             | 24  | 5.43(bd, J=6.7 Hz, 1H)  | <b>125.2(d)</b> |     |                |                 |

a) The assignment of C-5 and C-13 may be exchangeable.

Remark. The H-3 showed br triplet splitting patten (Figs. S14.2) in the C<sub>6</sub>D<sub>6</sub> solution. However, in the CDCl<sub>3</sub> solution, H-3 showed the dd splitting pattern ( $\delta_{\text{H}}$  3.21, d,  $J=11.7$  Hz and 4.3 Hz), thus strongly indicating that the OH at C-3 is  $\beta$ -oriented. The finding of a clear NOE in the C<sub>6</sub>D<sub>6</sub> solution (Fig. S14.6) further supported the  $\beta$ -orientation of 3-OH.



## 7. EIMS and NMR data of product 26

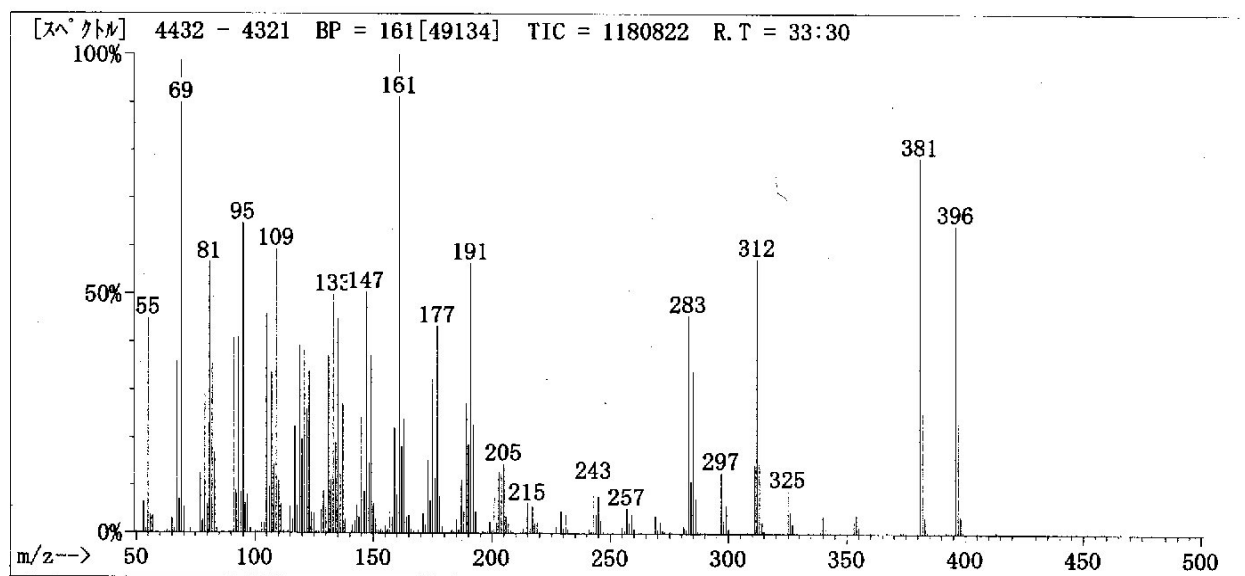

Fig. S7.1. EIMS of product 26.

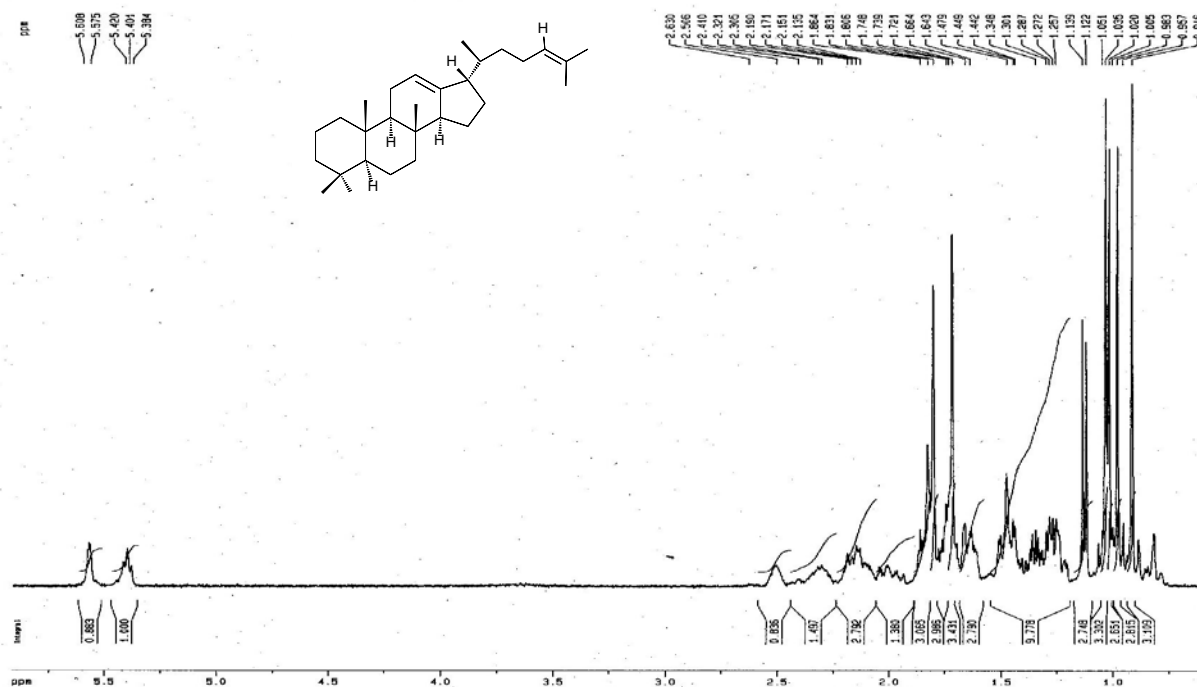

Fig. S7.2.1.  $^1\text{H}$  NMR spectrum of product 26 (400 MHz,  $\text{C}_6\text{D}_6$ ).

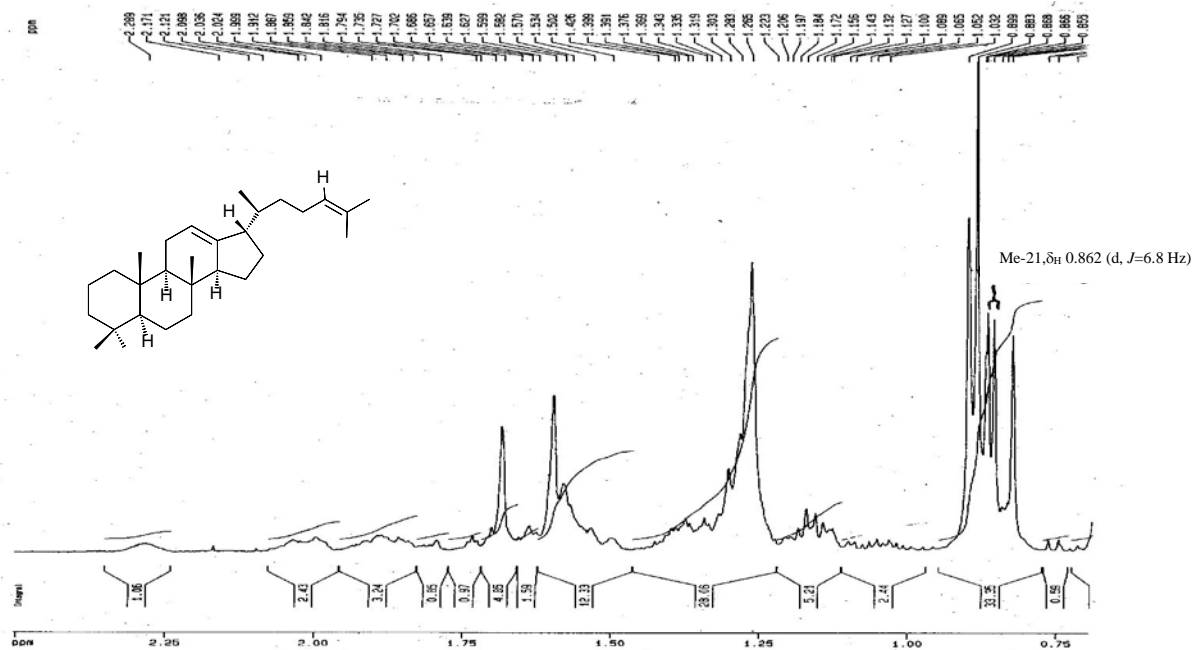

Fig. S7.2.2.  $^1\text{H}$  NMR spectrum (expanded region) of product **26** (400 MHz,  $\text{CDCl}_3$ )

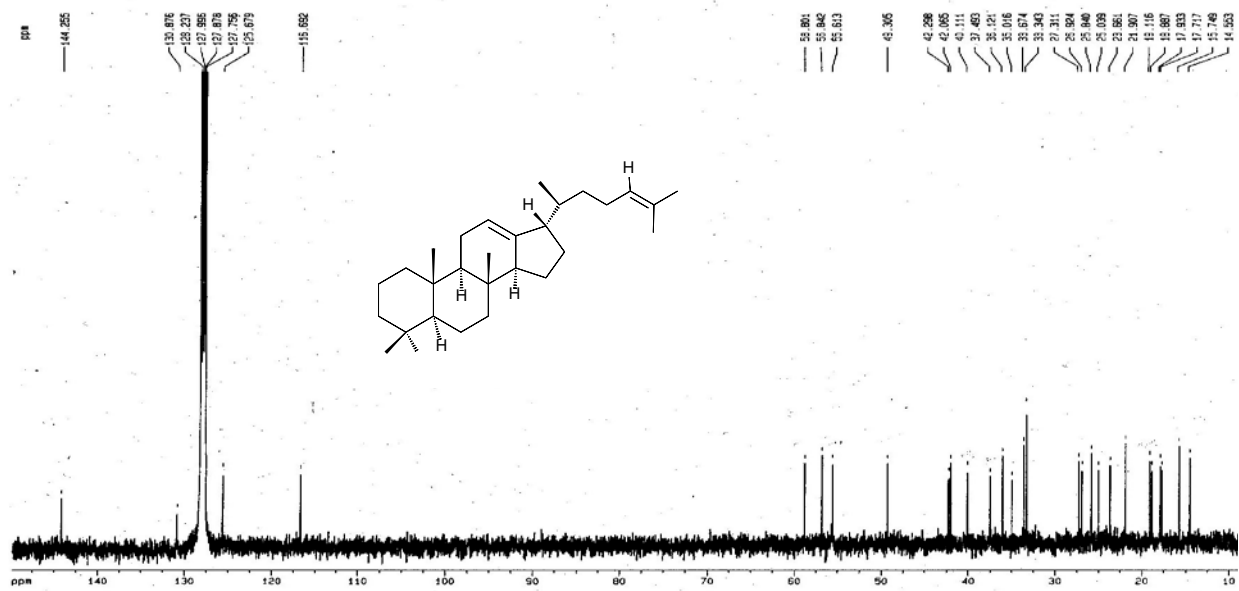

Fig. S7.3.  $^{13}\text{C}$  NMR of product **26** (100 MHz,  $\text{C}_6\text{D}_6$ ).

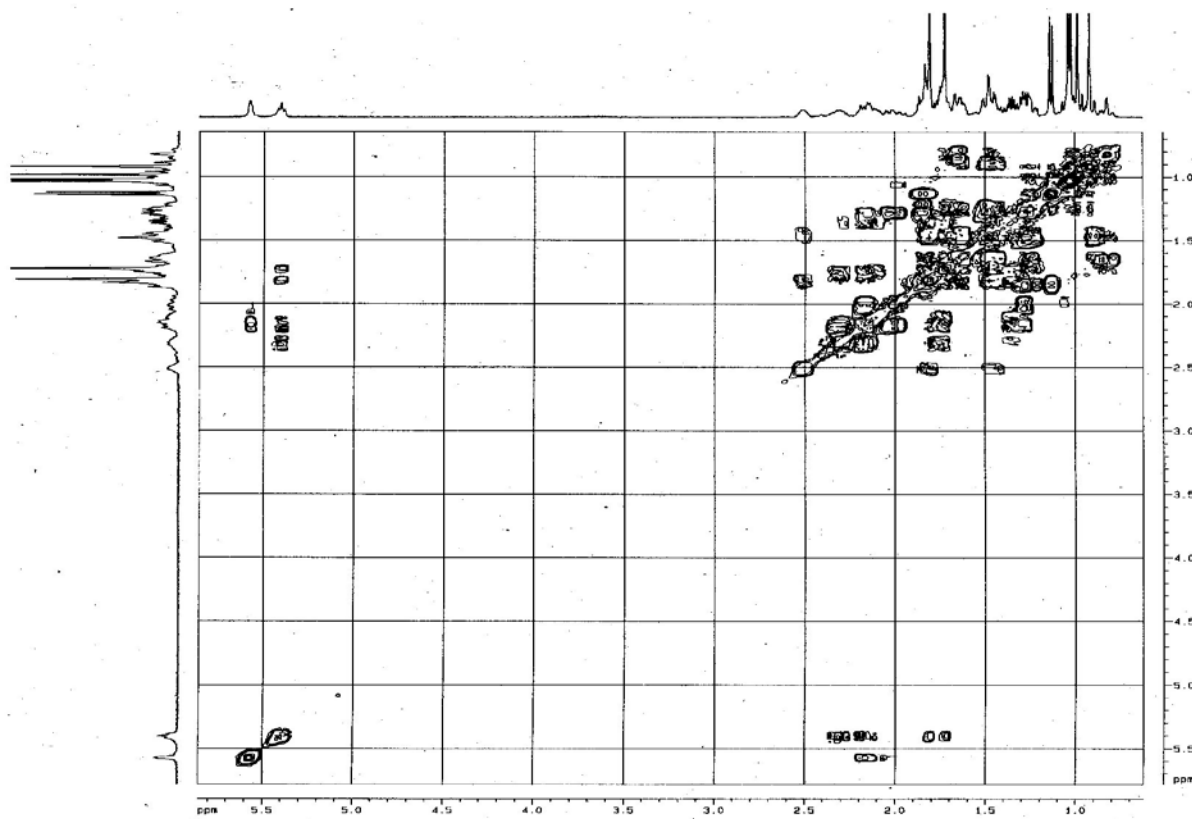

Fig. S7.4.  $^1\text{H}$ - $^1\text{H}$  COSY of product **26** (400 MHz,  $\text{C}_6\text{D}_6$ ).

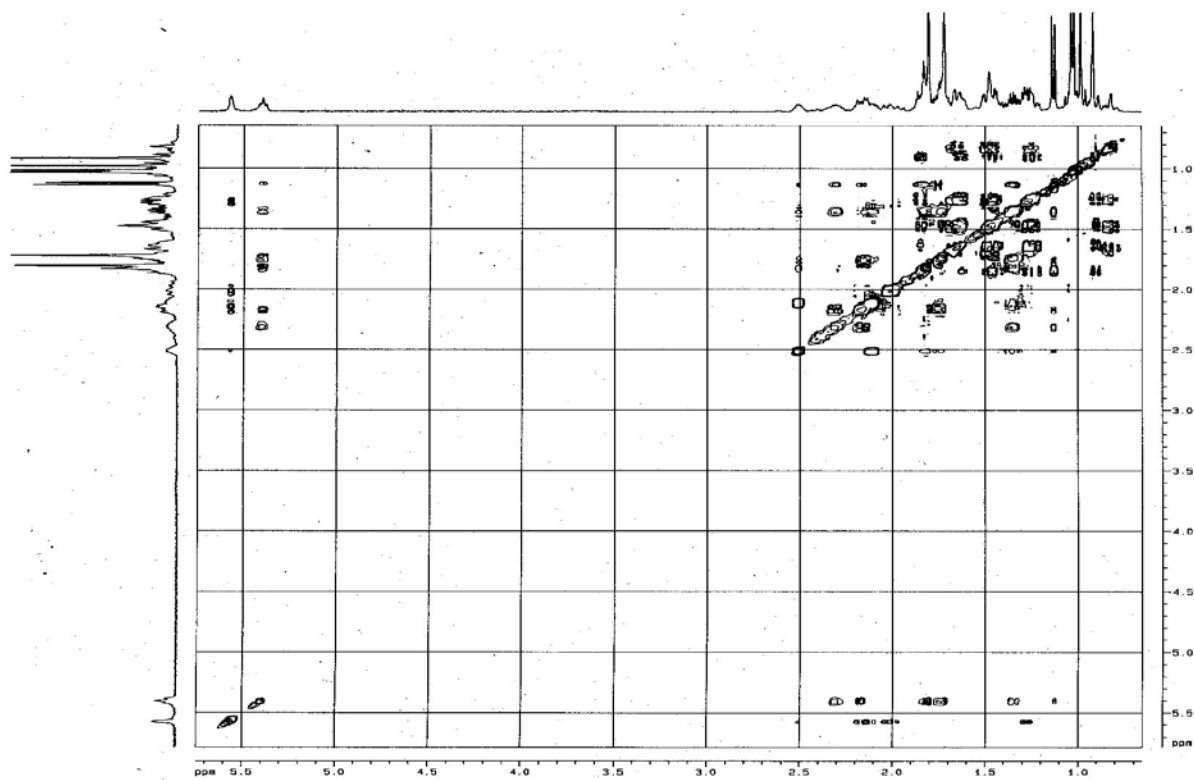

Fig. S7.5. TOCSY of Product **26** (400 MHz,  $\text{C}_6\text{D}_6$ ).

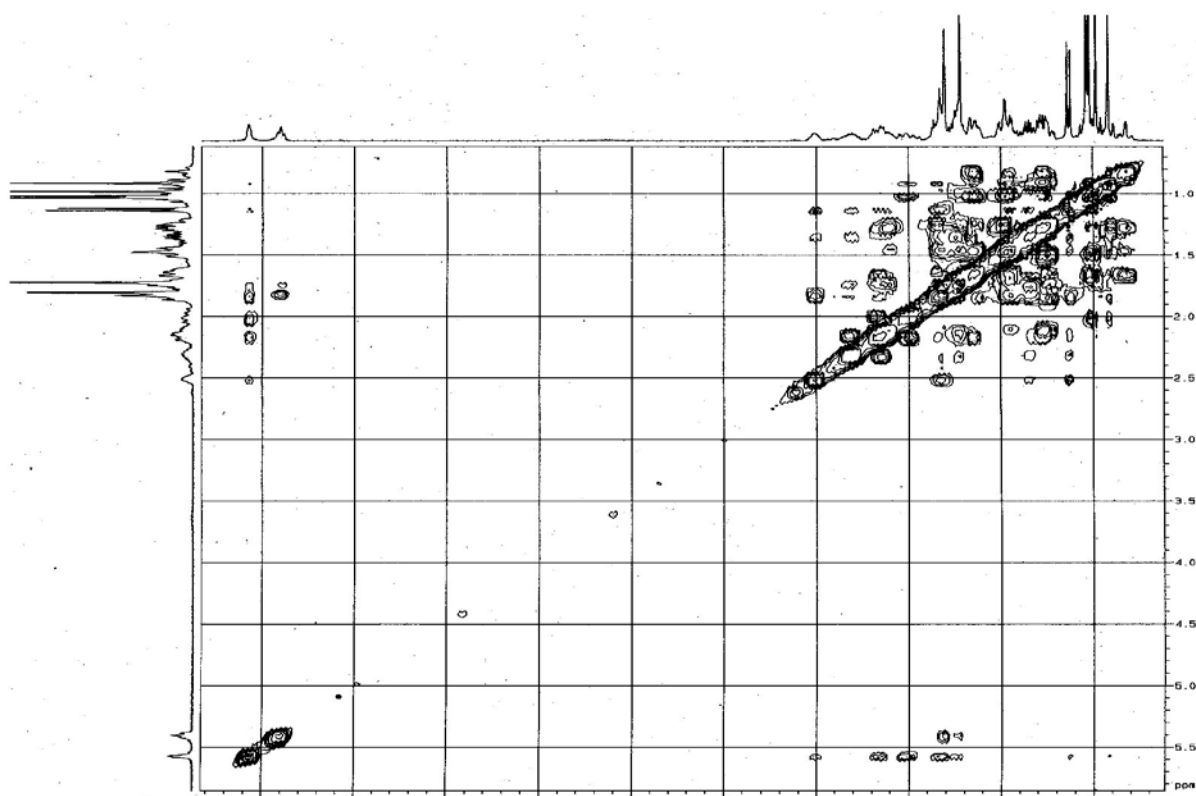

Fig. S7.6. NOESY of Product 26 (400 MHz, C<sub>6</sub>D<sub>6</sub>).

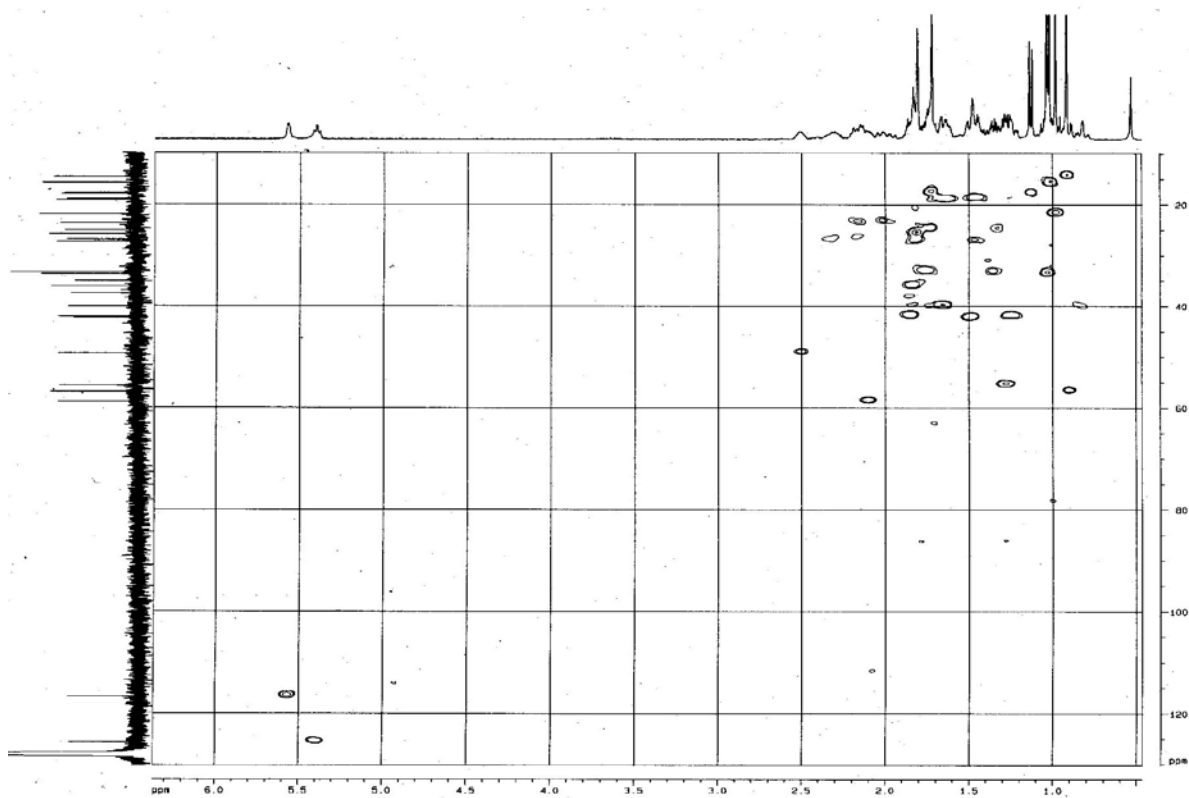

Fig. S7.7. HSQC of Product 26 (400 MHz, C<sub>6</sub>D<sub>6</sub>).

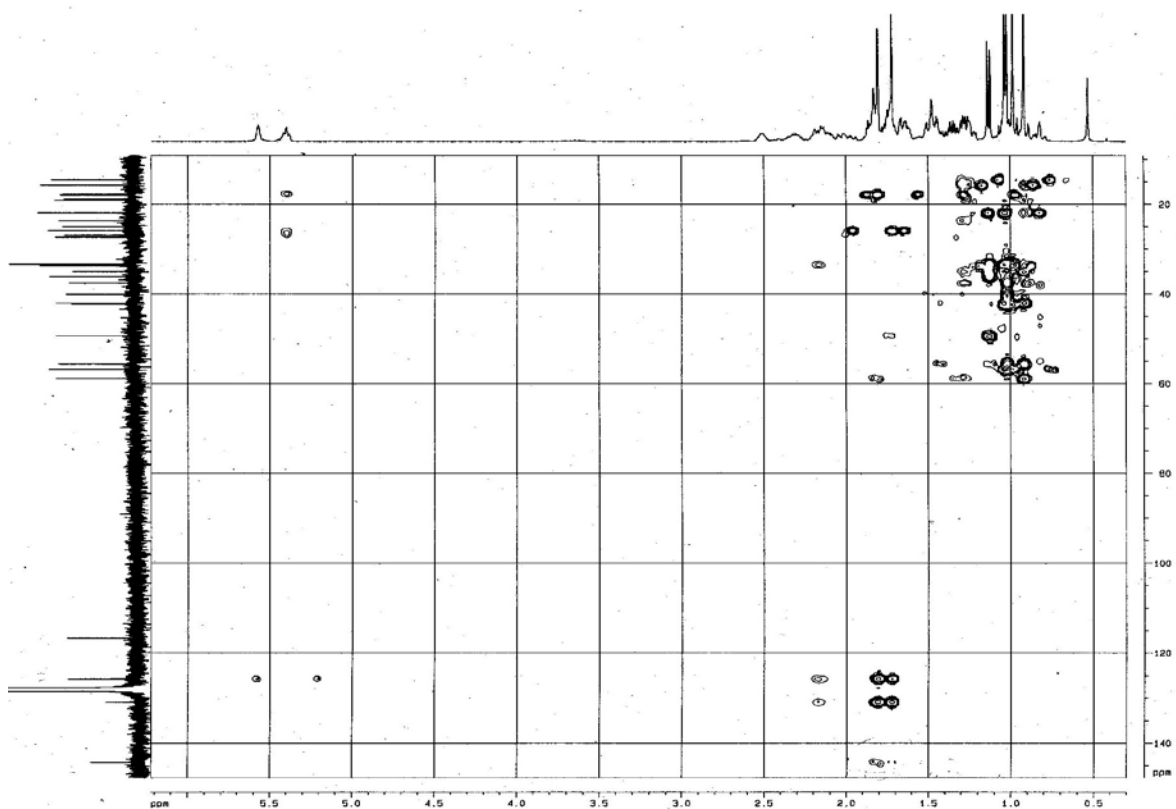

Fig. S7.8. HMBC of Product **26** (400 MHz, C<sub>6</sub>D<sub>6</sub>).

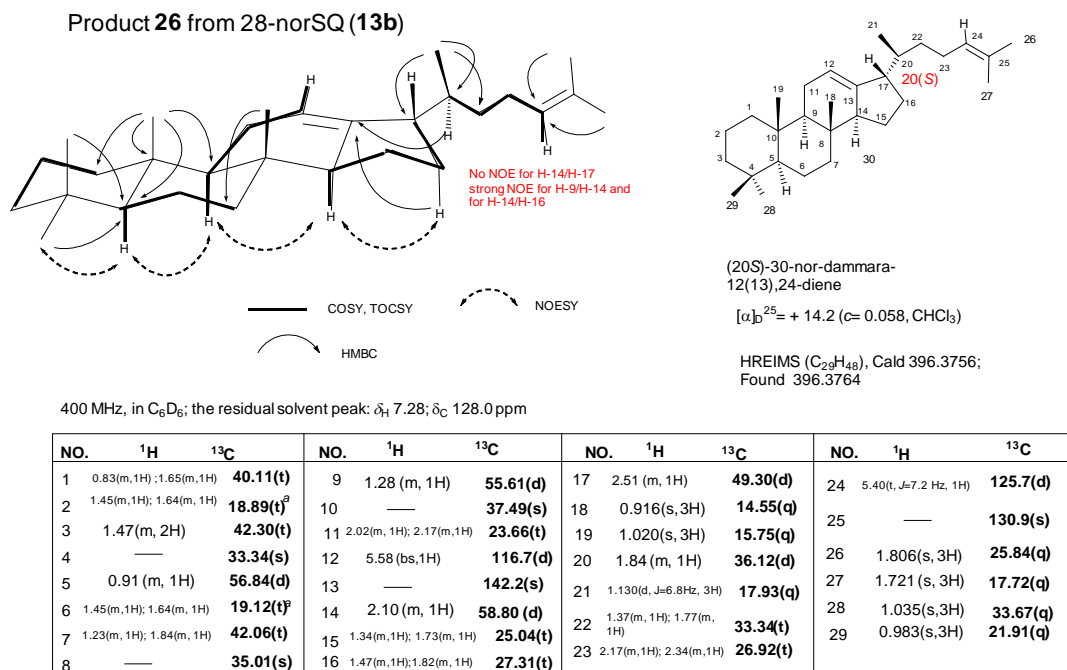

Me-27: δ<sub>H</sub>=0.862 (d, J=6.8 Hz) in CDCl<sub>3</sub>, which is indicative of 18-S stereochemistry.

Fig. S7.9. Assignments of NMR data of product **26** in C<sub>6</sub>D<sub>6</sub>, HR-EIMS and optical rotation.

## 8. EIMS and NMR data of product 27.

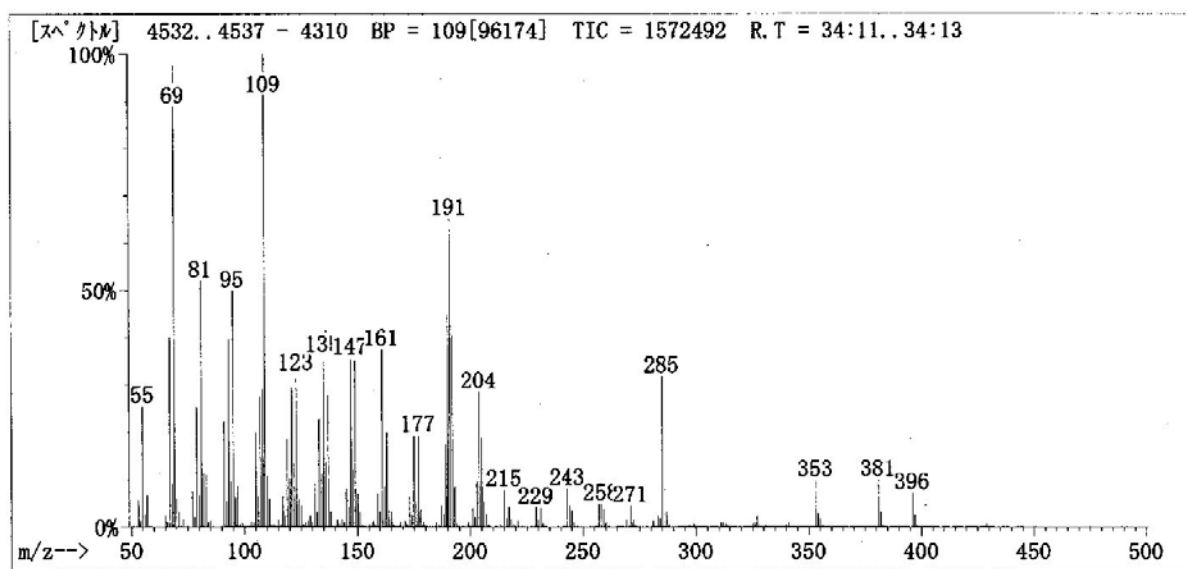

Fig. S8.1. EIMS of product 27.

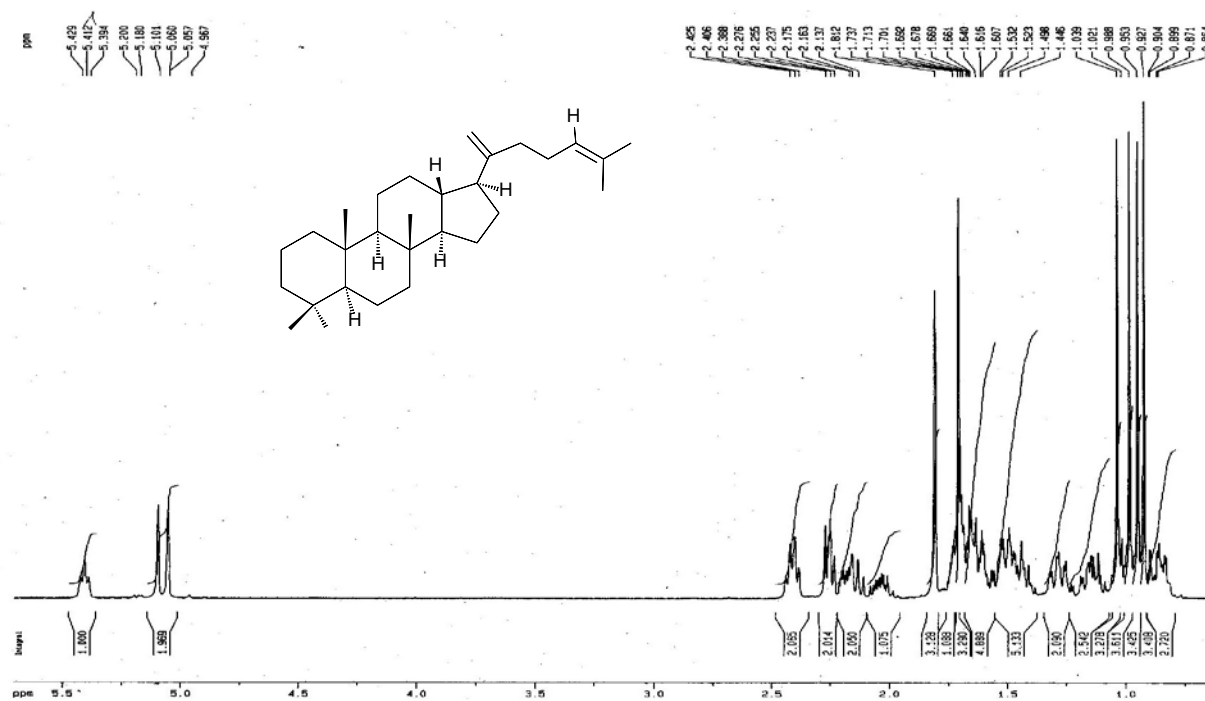

Fig. S8.2.  $^1\text{H}$  NMR of Product 27 (400 MHz,  $\text{C}_6\text{D}_6$ ).

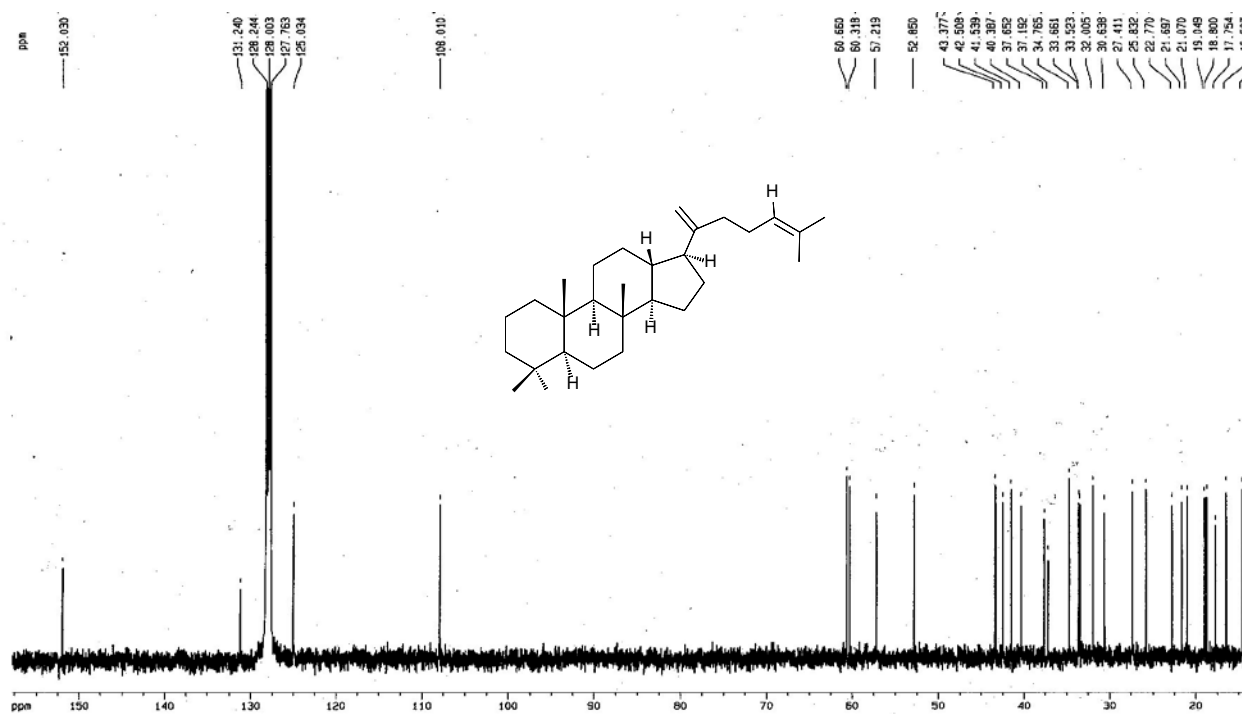

Fig. S8.3.  $^{13}\text{C}$  NMR of Product 27 (100 MHz,  $\text{C}_6\text{D}_6$ ).

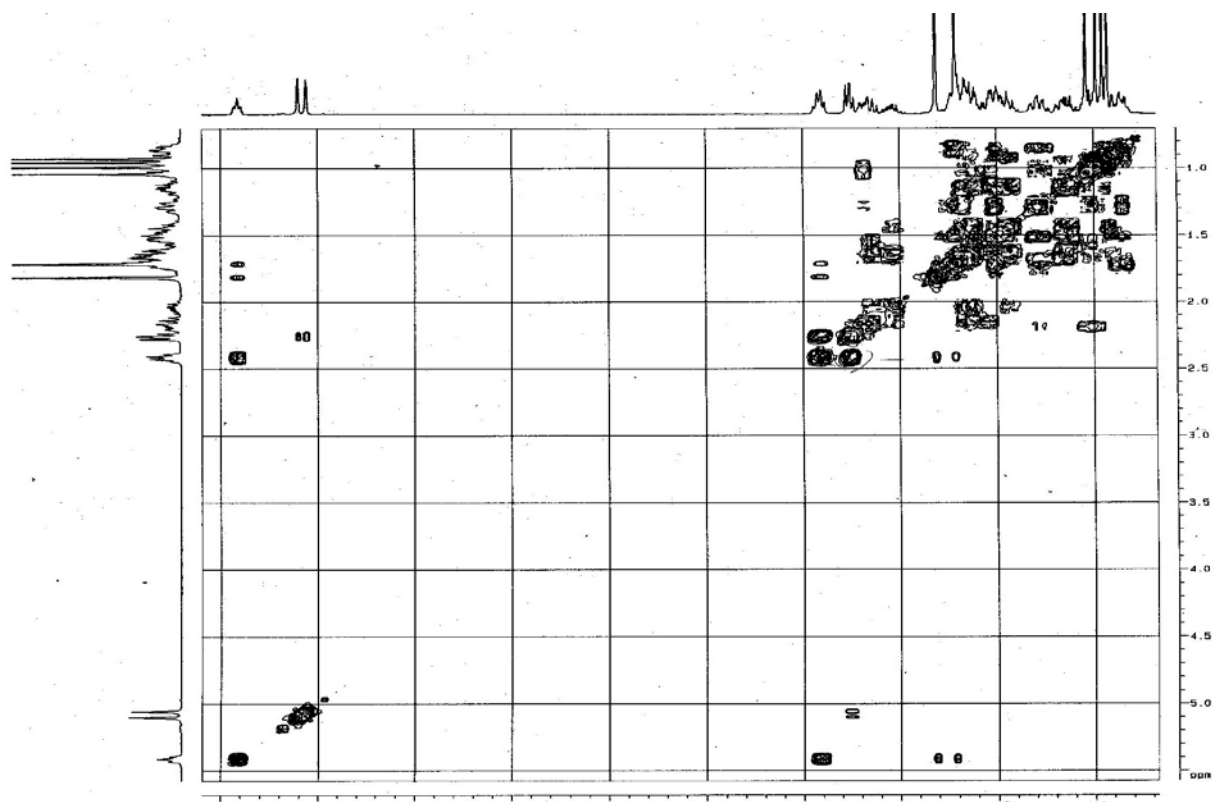

Fig. S8.4.  $^1\text{H}$ - $^1\text{H}$  COSY of product 27 (400 MHz,  $\text{C}_6\text{D}_6$ ).

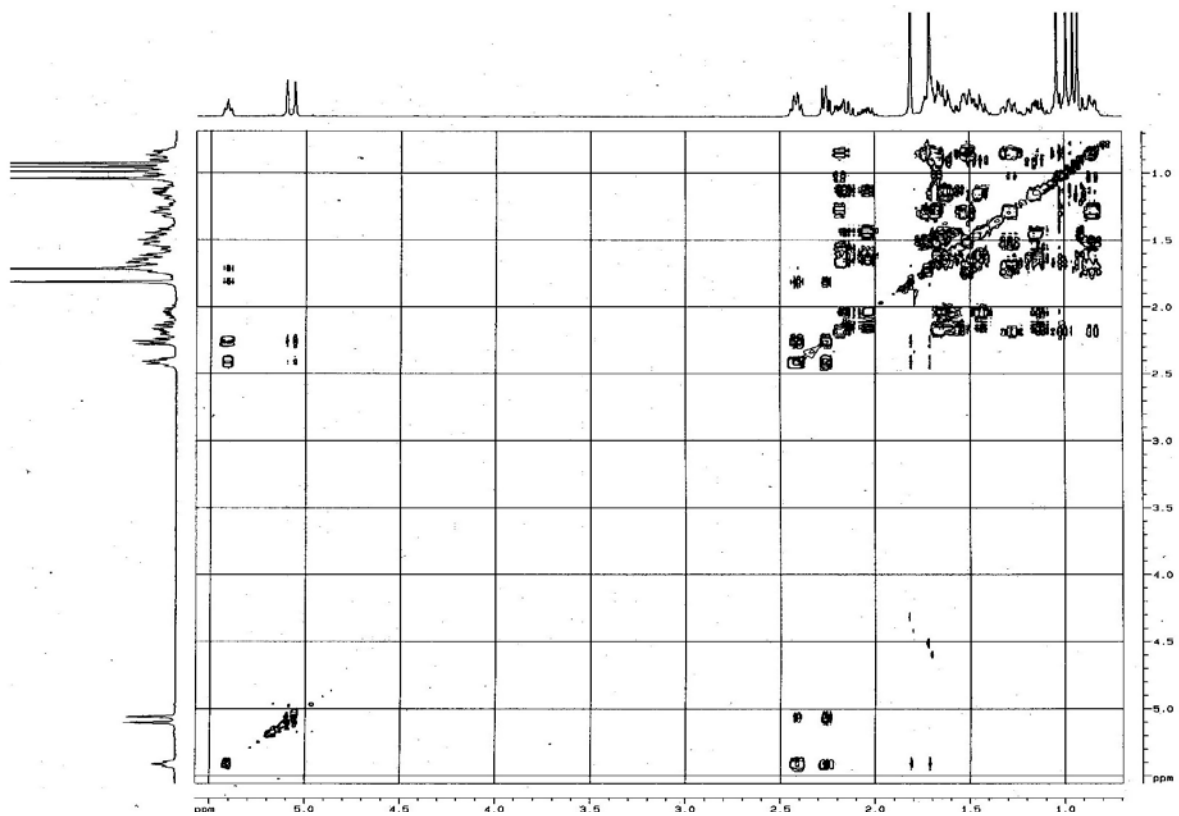

Fig. S8.5. TOCSY of **27** (400 MHz, C<sub>6</sub>D<sub>6</sub>).

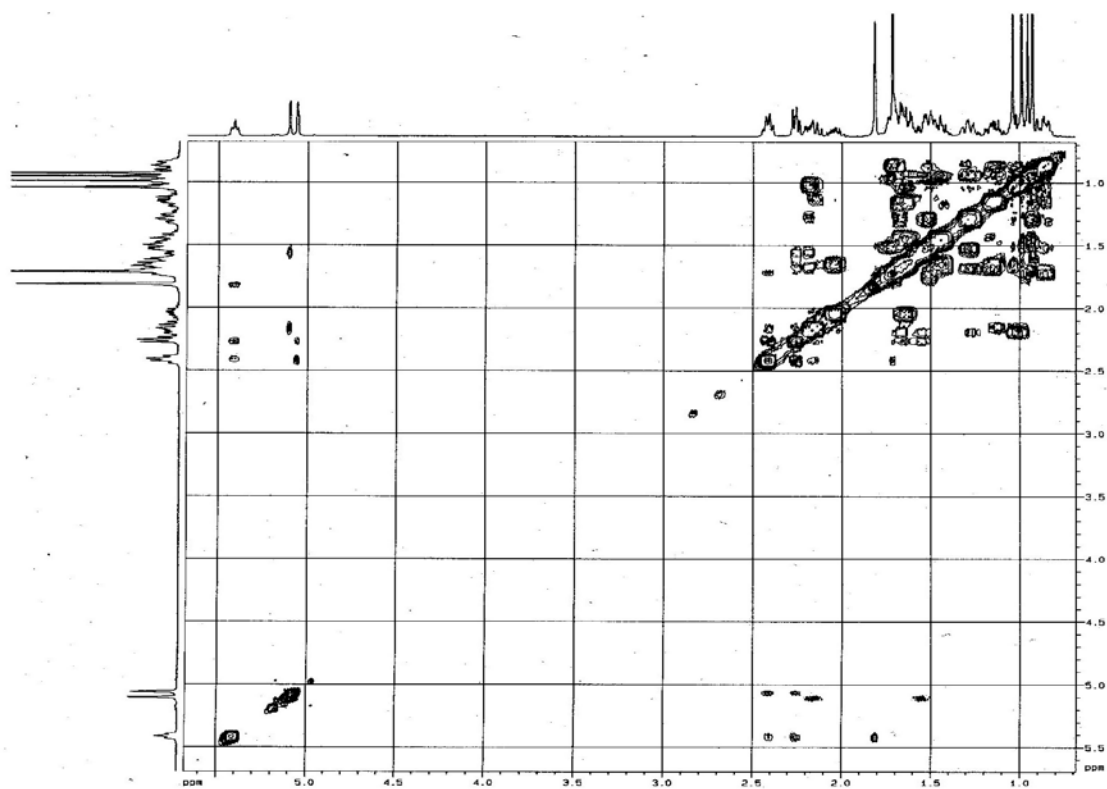

Fig. S8.6. NOESY of **27** (400 MHz, C<sub>6</sub>D<sub>6</sub>).



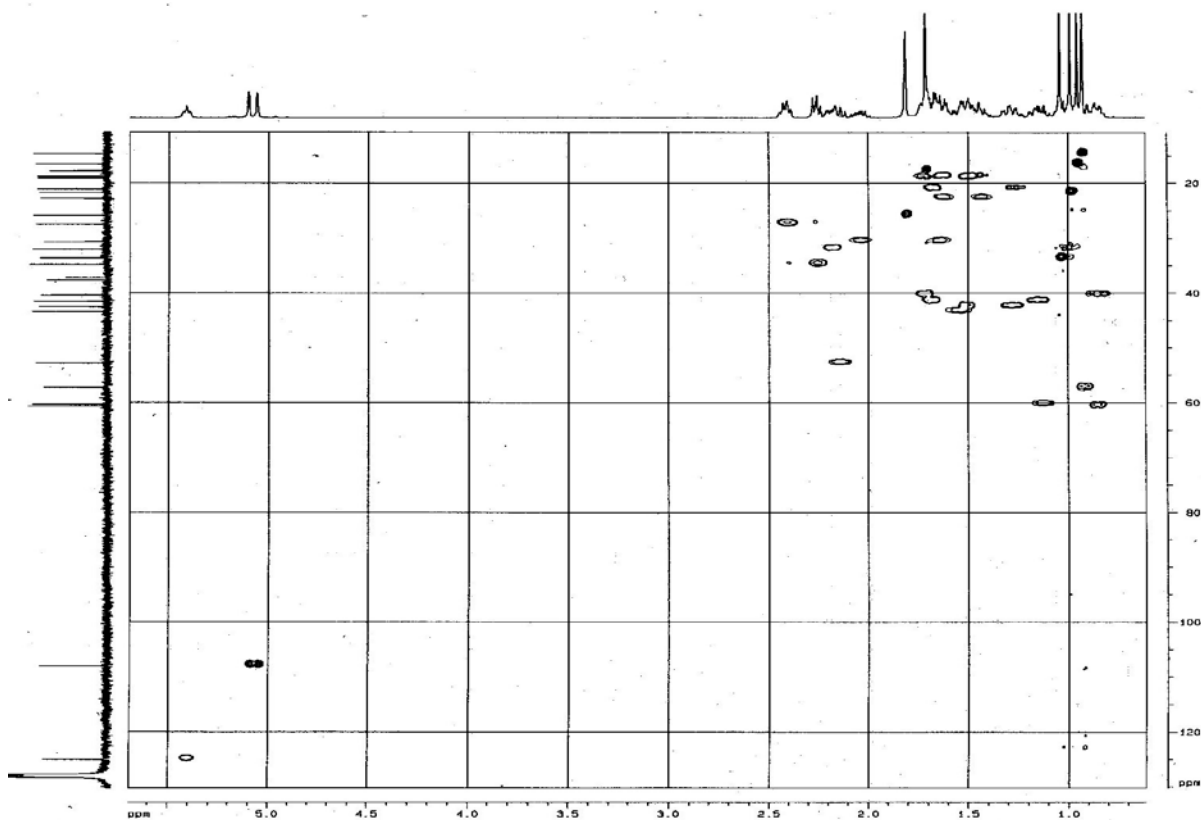

Fig. S8.7. HSQC of **27** (400 MHz,  $C_6D_6$ ).

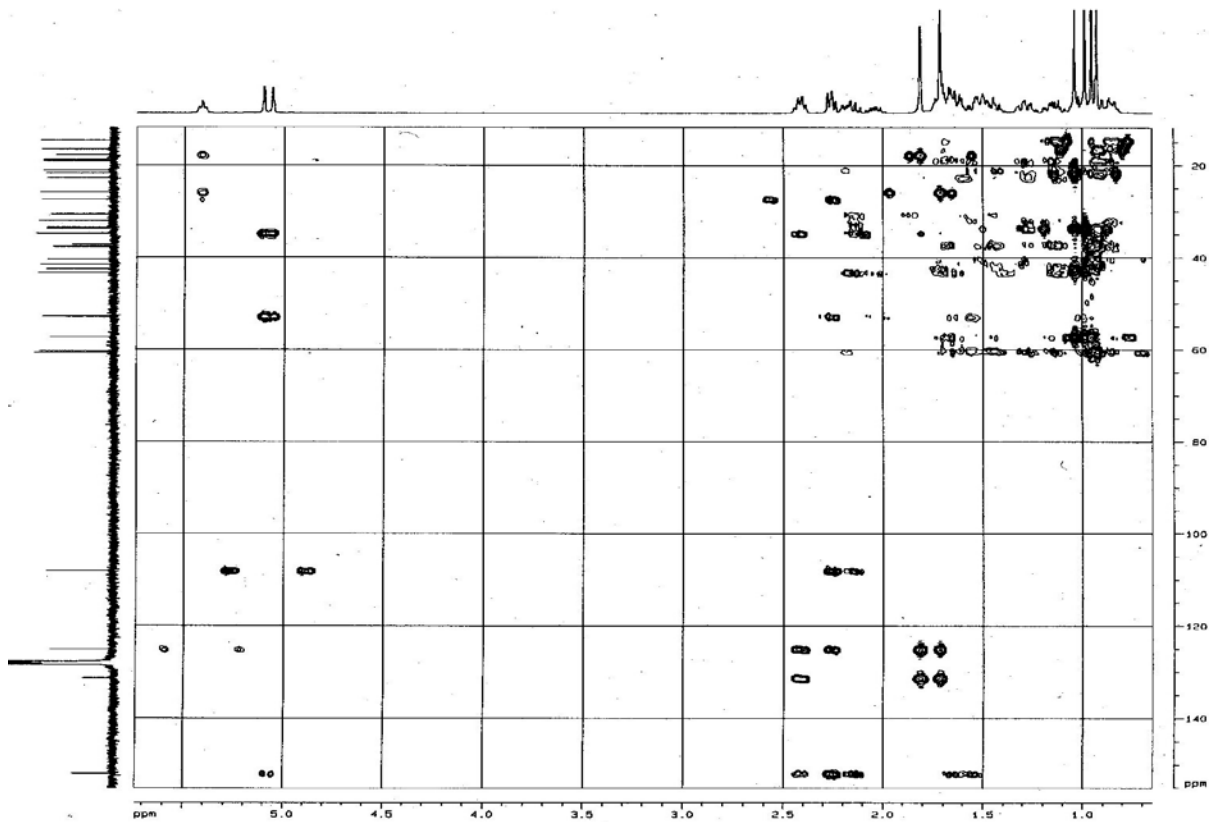

Fig. S8.8. HMBC of **27** (400 MHz,  $C_6D_6$ ).

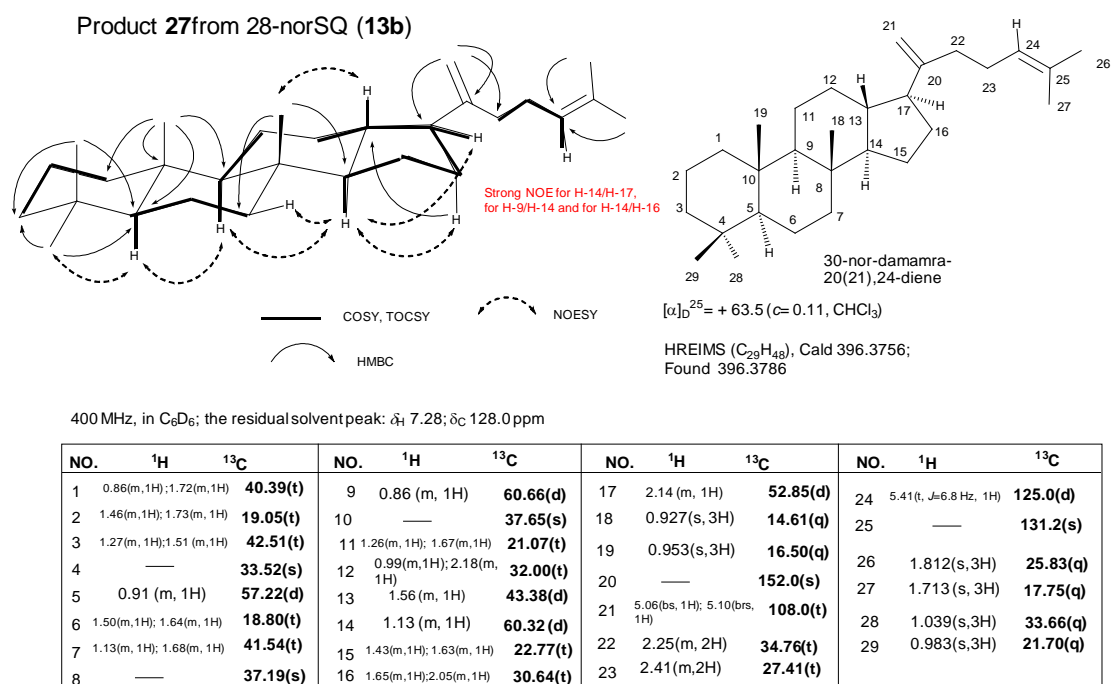

**Fig. S8.9.** Assignments of NMR data of product **27** in  $\text{C}_6\text{D}_6$ , HR-EIMS and optical rotation.

## 9. EIMS and NMR data of product 28.

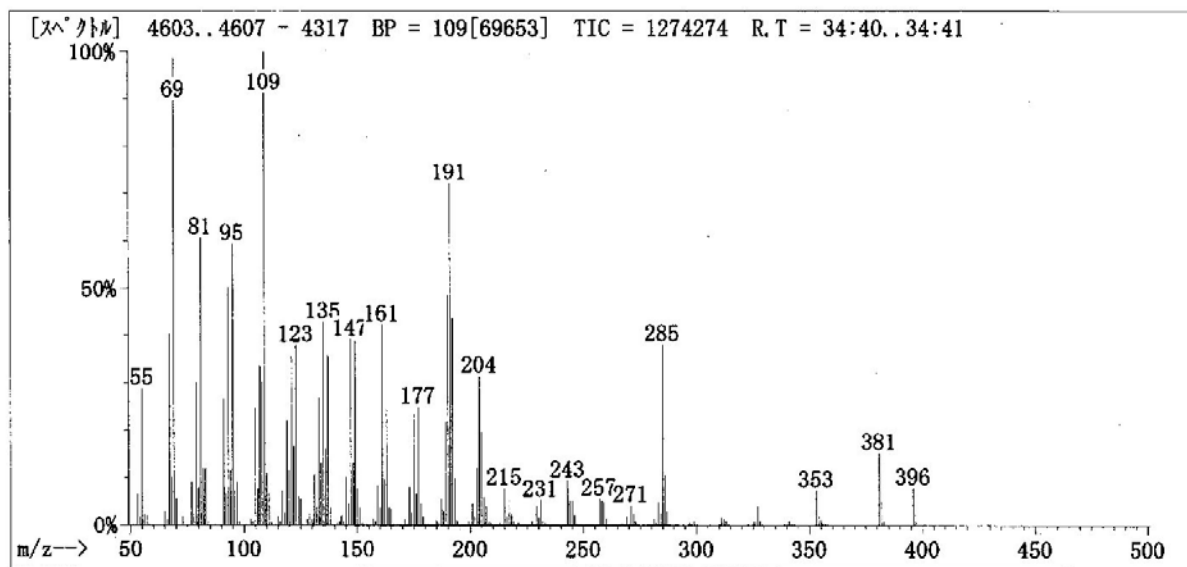

Fig. S9.1. EIMS of product 28.

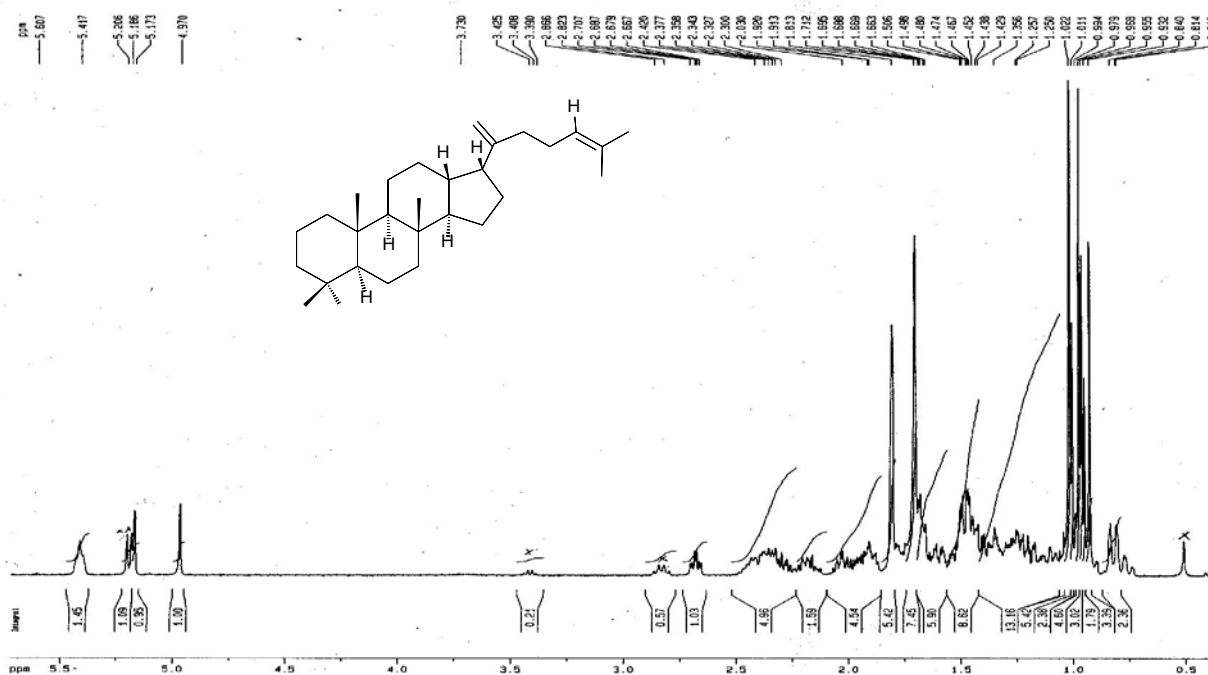

Fig. S9.2. <sup>1</sup>H NMR of Product 28 (400 MHz, C<sub>6</sub>D<sub>6</sub>).

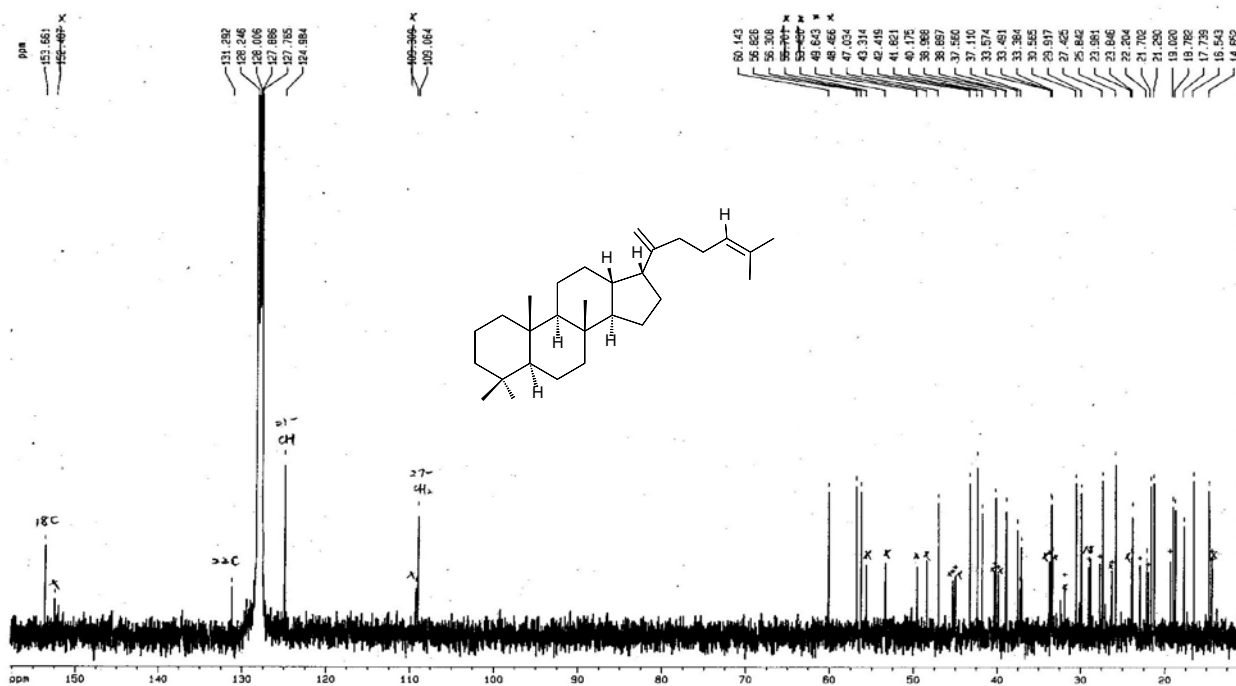

Fig. S9.3.  $^{13}\text{C}$  NMR of Product 28 (100 MHz,  $\text{C}_6\text{D}_6$ ).

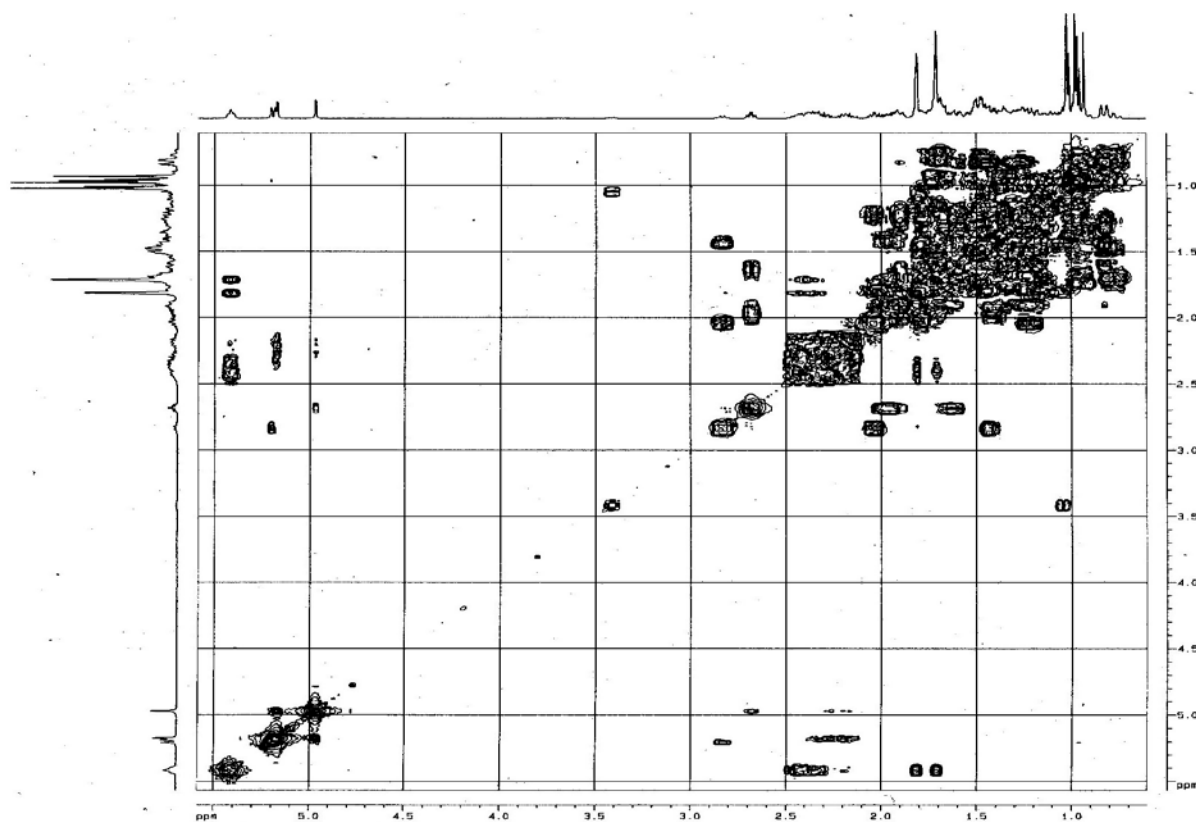

Fig. S9.4.  $^1\text{H}$ - $^1\text{H}$  COSY of product 28 (400 MHz,  $\text{C}_6\text{D}_6$ ).

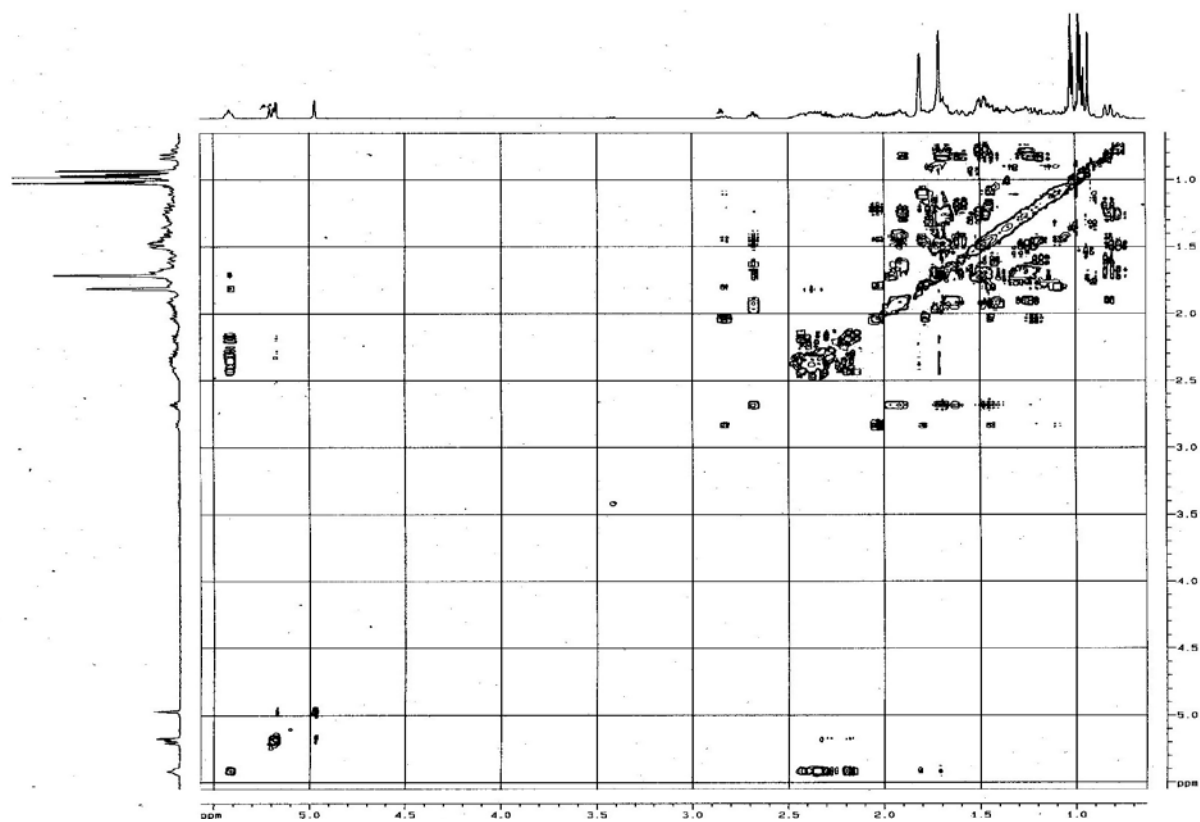

**Fig. S9.5.** TOCSY of **28** (400 MHz, C<sub>6</sub>D<sub>6</sub>).

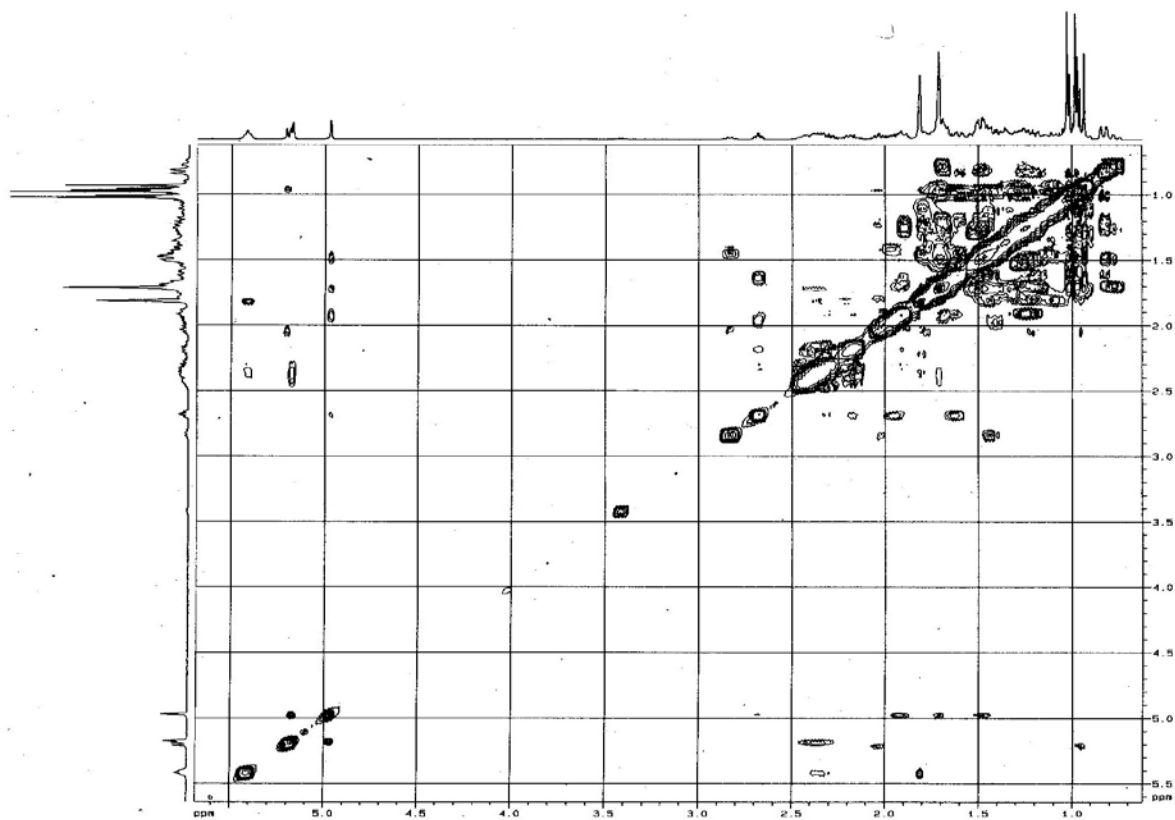

**Fig. S9.6.** NOESY of **28** (400 MHz, C<sub>6</sub>D<sub>6</sub>).

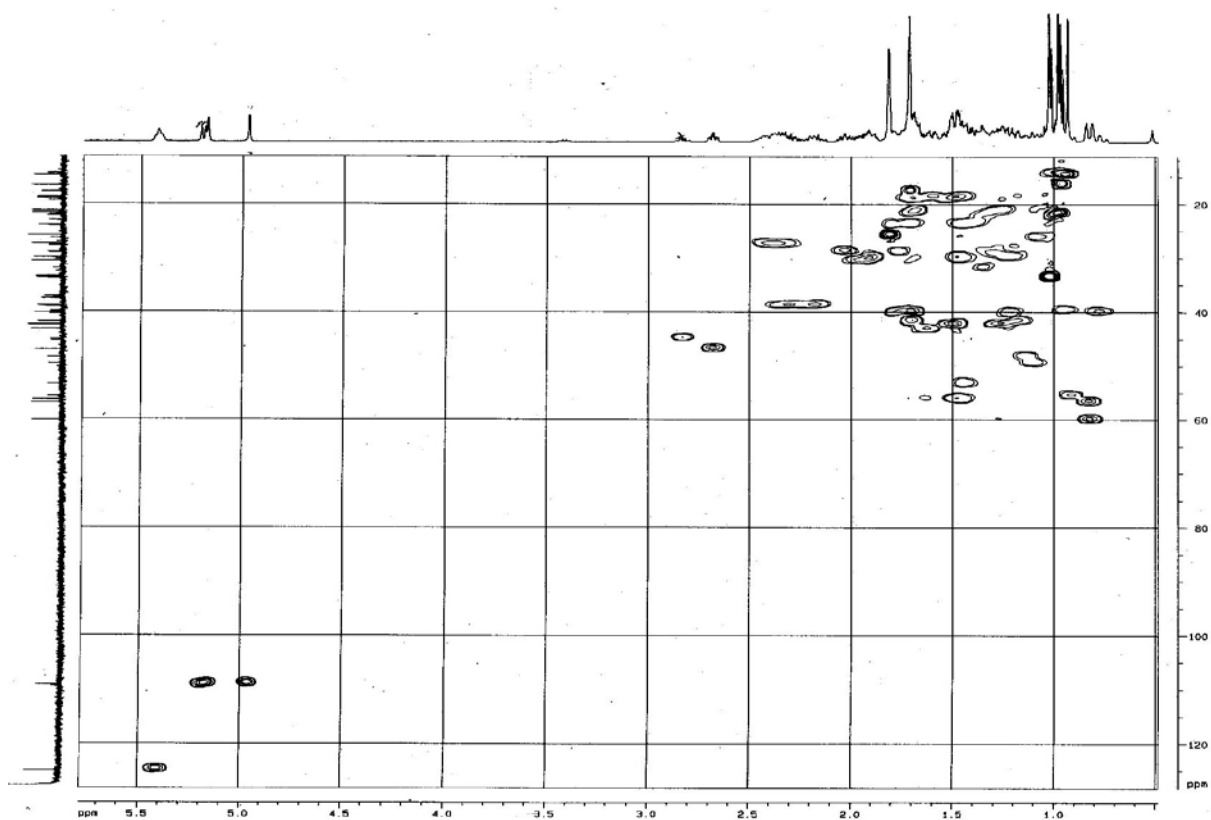

Fig. S9.7. HSQC of **28** (400 MHz, C<sub>6</sub>D<sub>6</sub>).

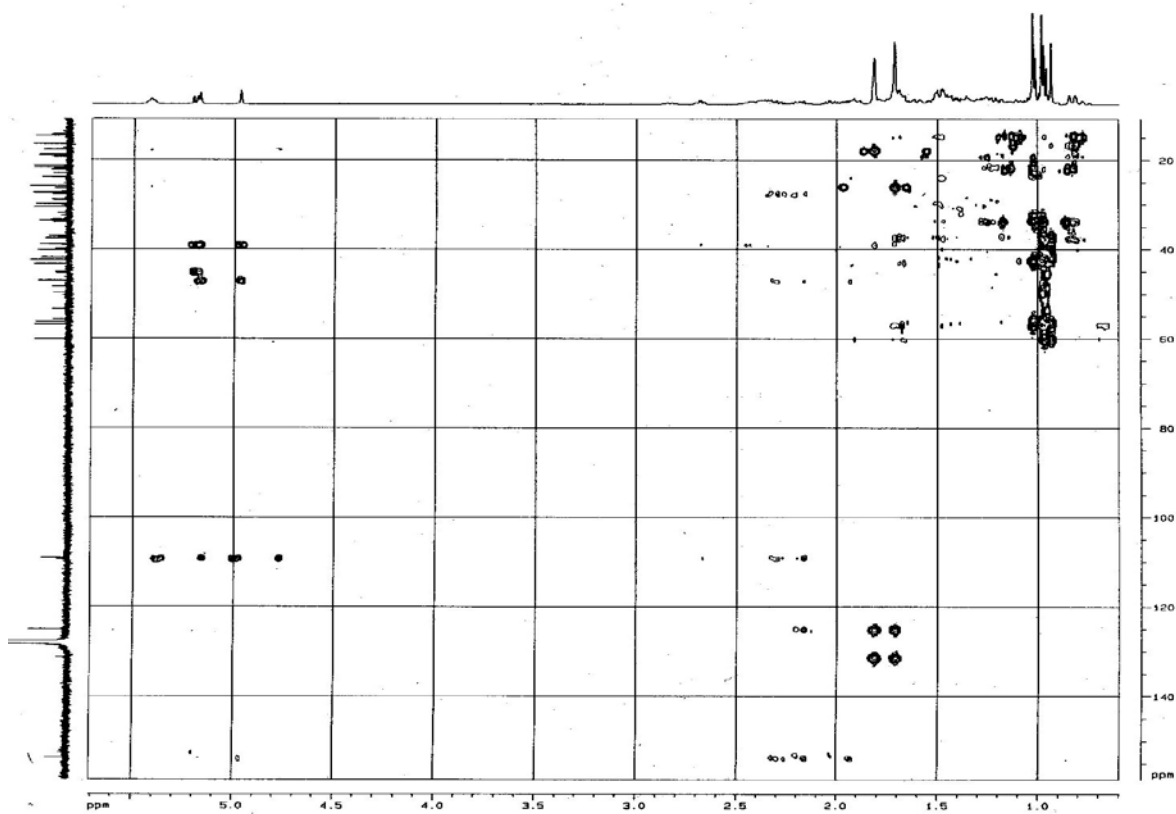

Fig. S9.8. HMBC of **28** (400 MHz, C<sub>6</sub>D<sub>6</sub>).

Product **28** from 28-norSQ (**13b**)

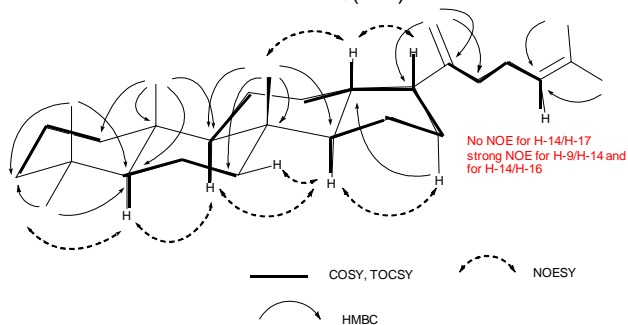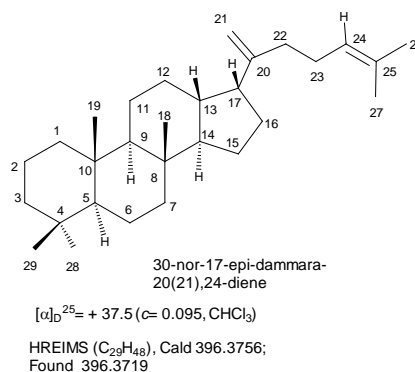

400 MHz, in  $\text{C}_6\text{D}_6$ ; the residual solvent peak:  $\delta_H$  7.28;  $\delta_C$  128.0 ppm

| NO. | $^1\text{H}$             | $^{13}\text{C}$ | NO. | $^1\text{H}$            | $^{13}\text{C}$  | NO. | $^1\text{H}$                          | $^{13}\text{C}$ | NO. | $^1\text{H}$                   | $^{13}\text{C}$ |
|-----|--------------------------|-----------------|-----|-------------------------|------------------|-----|---------------------------------------|-----------------|-----|--------------------------------|-----------------|
| 1   | 0.78(m,1H);1.70(m,1H)    | <b>40.18(t)</b> | 9   | 0.82 (m, 1H)            | <b>60.14(d)</b>  | 17  | 2.68 (dt, $J=3.2, 8.0\text{Hz}$ , 1H) | <b>47.03(d)</b> | 24  | 5.42(t, $J=6.8\text{Hz}$ , 1H) | <b>125.0(d)</b> |
| 2   | 1.47(m,1H); 1.69(m, 1H)  | <b>19.02(t)</b> | 10  | —                       | <b>37.56(s)</b>  | 18  | 0.932(s,3H)                           | <b>14.65(q)</b> | 25  | —                              | <b>131.3(s)</b> |
| 3   | 1.27(m, 1H);1.49 (m,1H)  | <b>42.42(t)</b> | 11  | 1.26(m, 1H); 1.67(m,1H) | <b>21.29(t)</b>  | 19  | 0.968(s,3H)                           | <b>16.54(q)</b> | 26  | 1.813(s,3H)                    | <b>25.84(q)</b> |
| 4   | —                        | <b>33.49(s)</b> | 12  | 1.22(m,1H);1.91(m, 1H)  | <b>29.92(t)</b>  | 20  | —                                     | <b>153.7(s)</b> | 27  | 1.712 (s, 3H)                  | <b>17.74(q)</b> |
| 5   | 0.93 (m, 1H)             | <b>56.83(d)</b> | 13  | 1.62 (m, 1H)            | <b>43.31(d)</b>  | 21  | 4.97(bs, 1H); 5.17(bvs, 1H)           | <b>109.0(t)</b> | 28  | 1.022(s,3H)                    | <b>33.57(q)</b> |
| 6   | 1.43(m,1H); 1.57(m, 1H)  | <b>18.78(t)</b> | 14  | 1.47 (m, 1H)            | <b>56.31 (d)</b> | 22  | 2.17(m, 1H);2.32(m, 1H)               | <b>38.90(t)</b> | 29  | 0.979(s,3H)                    | <b>21.70(q)</b> |
| 7   | 1.16(m, 1H); 1.69(m, 1H) | <b>41.82(t)</b> | 15  | 1.43(m,1H); 1.76(m, 1H) | <b>23.84(t)</b>  | 23  | 2.38(m,2H)                            | <b>27.42(t)</b> |     |                                |                 |
| 8   | —                        | <b>37.11(s)</b> | 16  | 1.68(m,1H);1.98(m, 1H)  | <b>30.56(t)</b>  |     |                                       |                 |     |                                |                 |

**Fig. S9.9.** Assignments of NMR data of product **28** in  $\text{C}_6\text{D}_6$ , HR-EIMS and optical rotation.

## 10. EIMS and NMR data of product 29.

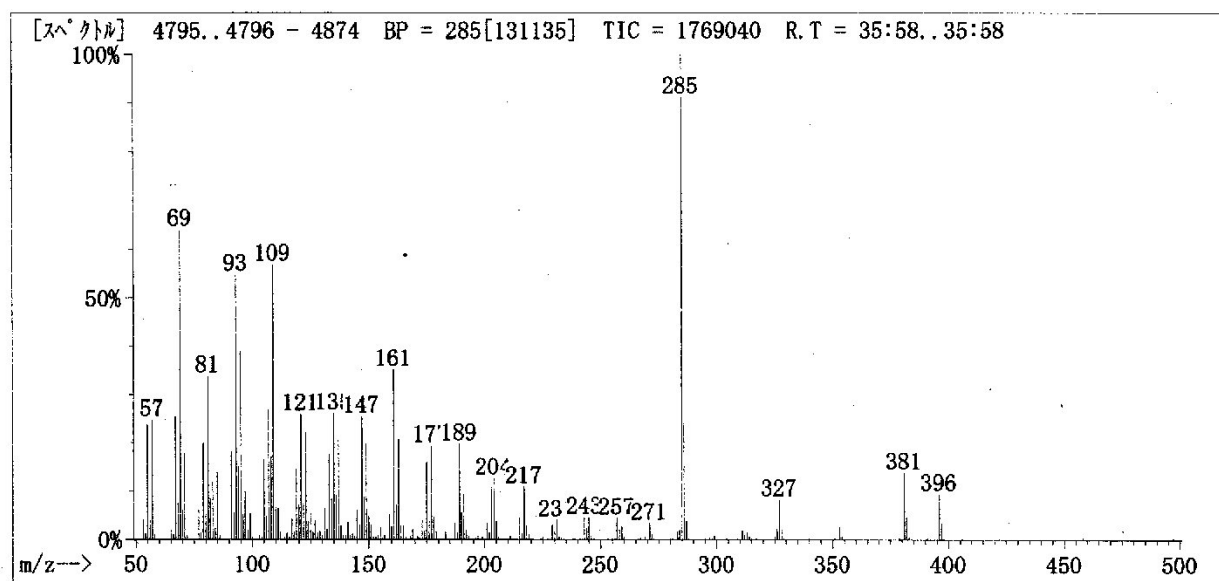

Fig. S10.1. EIMS of product 29.

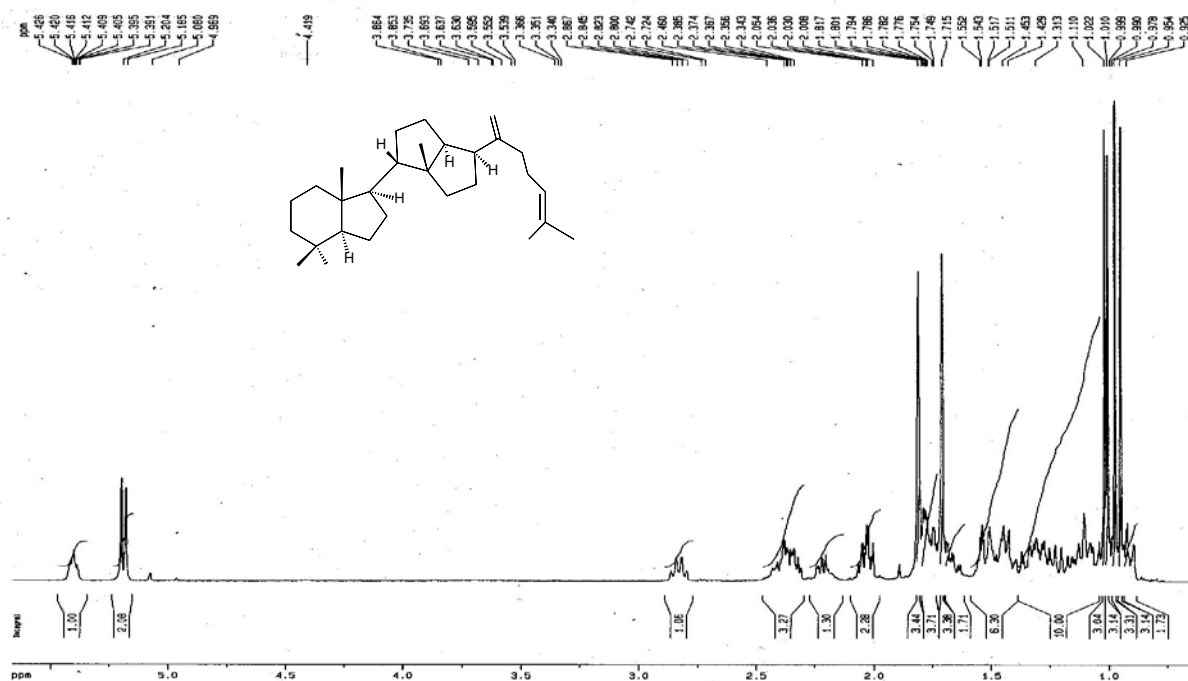

Fig. S10.2.  $^1\text{H}$  NMR of Product 29 (400 MHz,  $\text{C}_6\text{D}_6$ ).



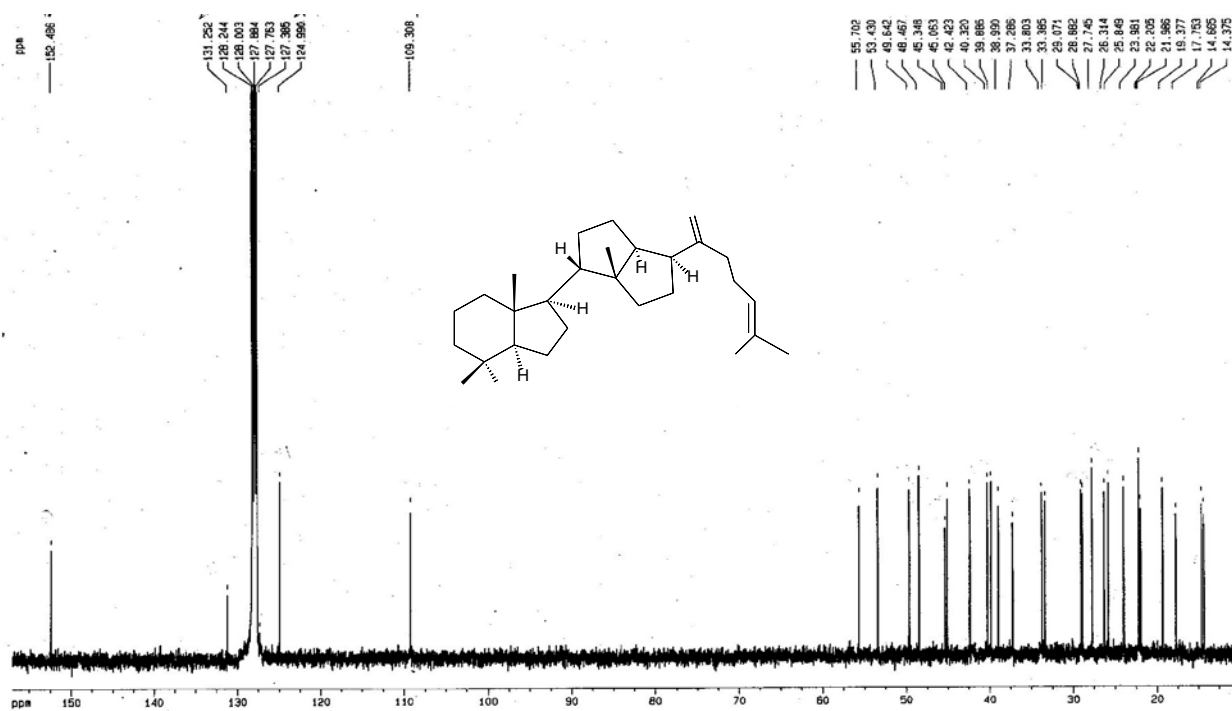

Fig. S10.3.  $^{13}\text{C}$  NMR of Product 29 (100 MHz,  $\text{C}_6\text{D}_6$ ).

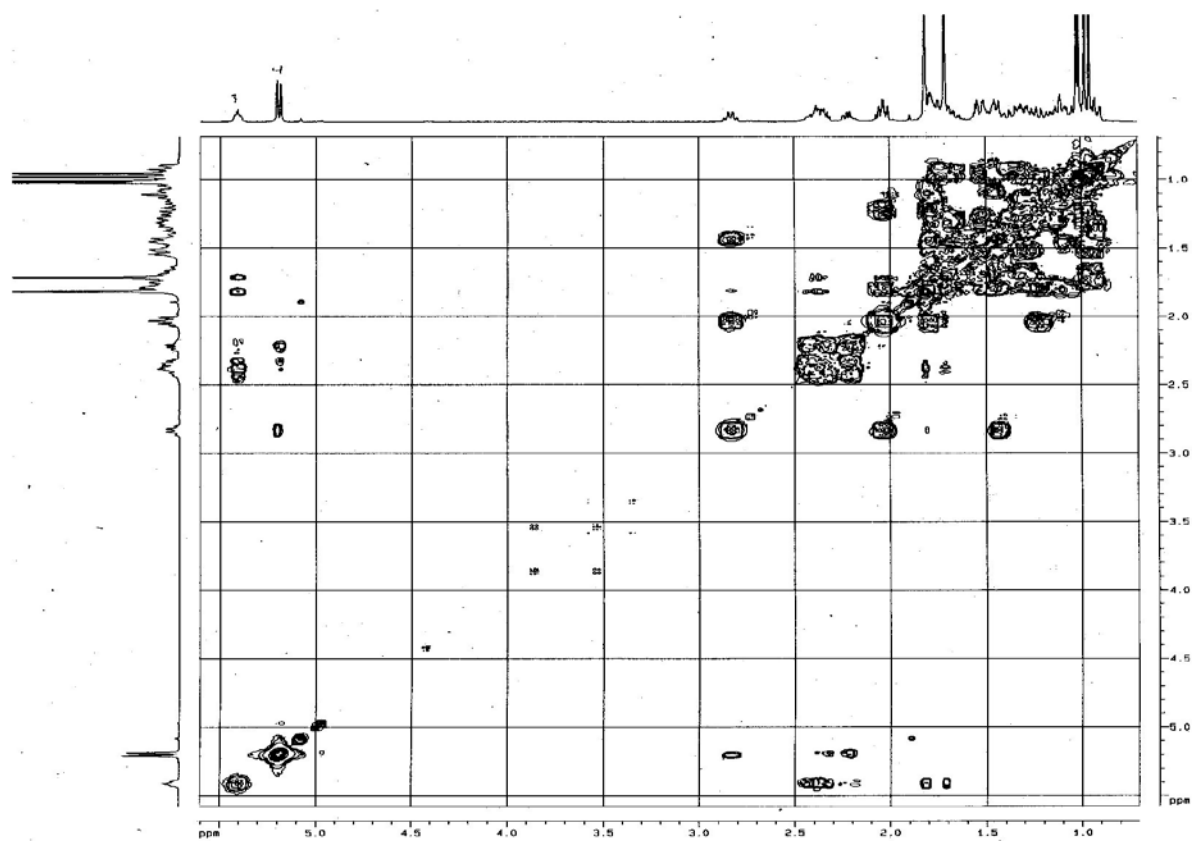

Fig. S10.4.  $^1\text{H}$ - $^1\text{H}$  COSY of product 29 (400 MHz,  $\text{C}_6\text{D}_6$ ).

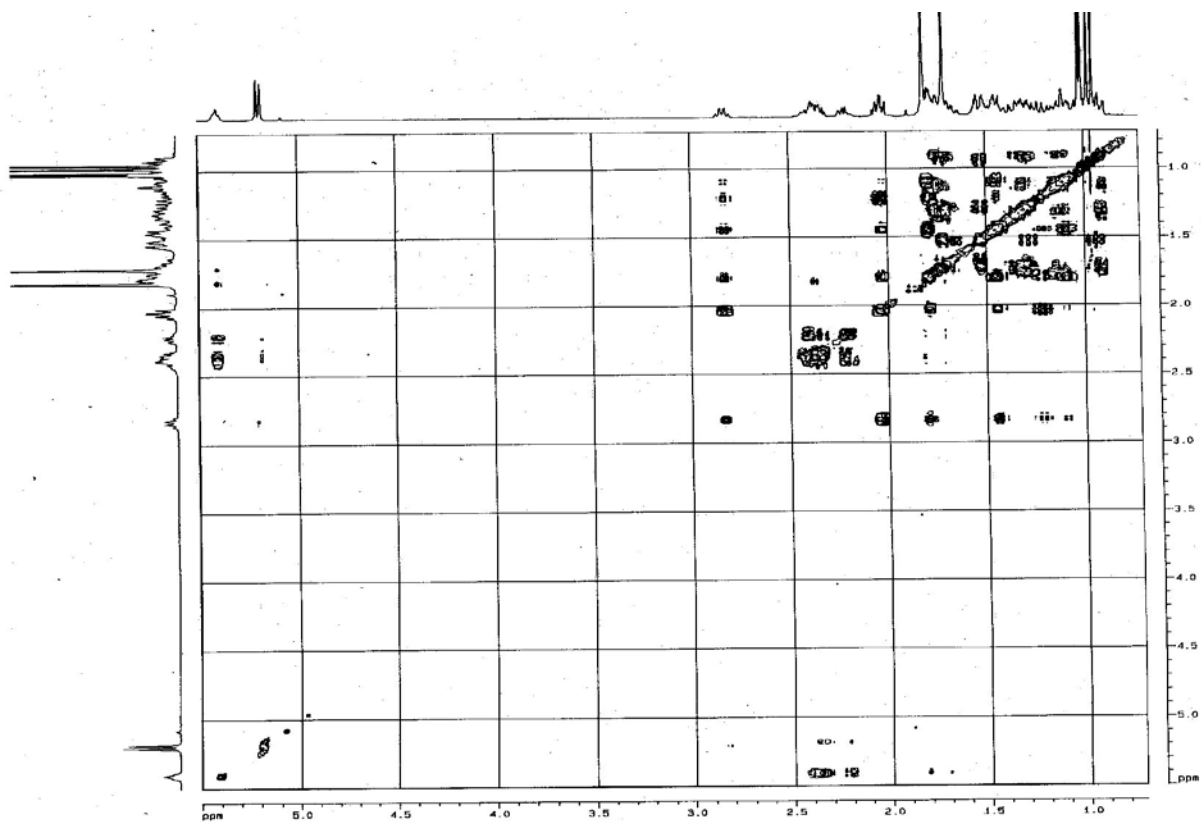

Fig. S10.5. TOCSY of **29** (400 MHz,  $C_6D_6$ ).

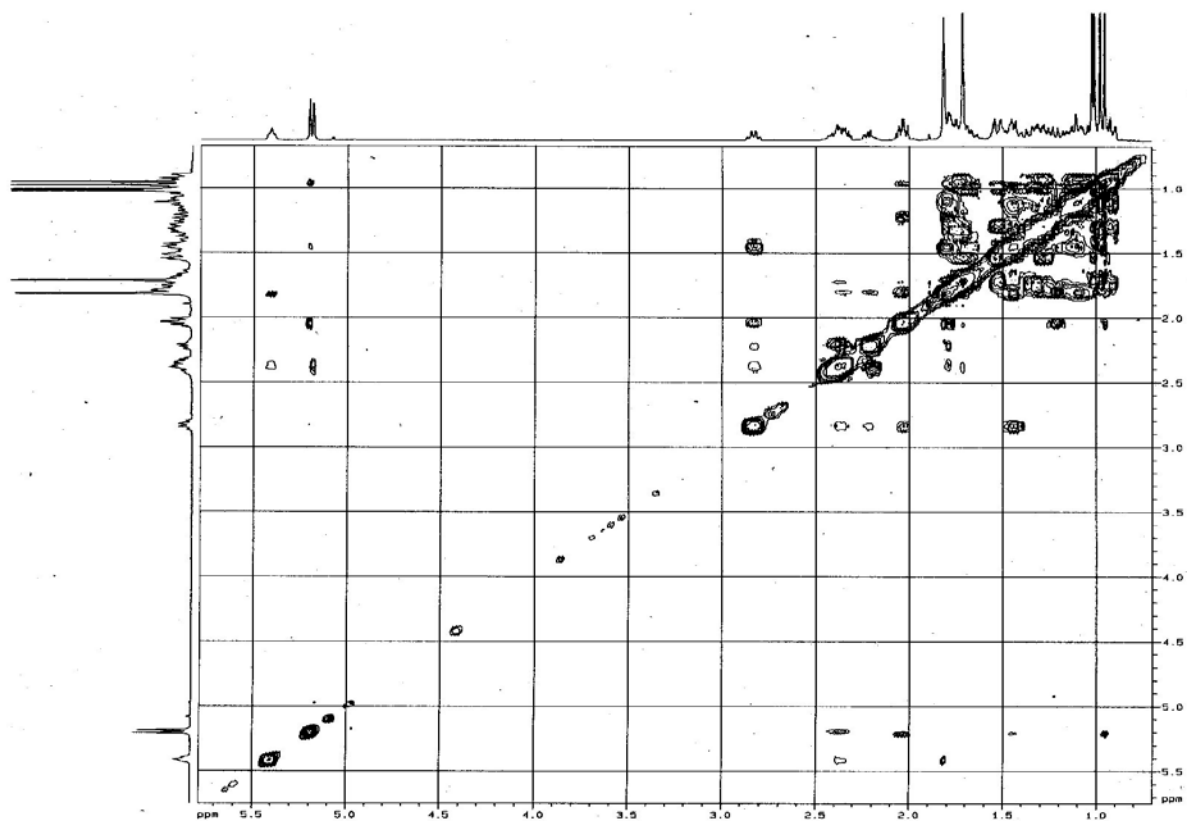

Fig. S10.6. NOESY of **29** (400 MHz,  $C_6D_6$ ).

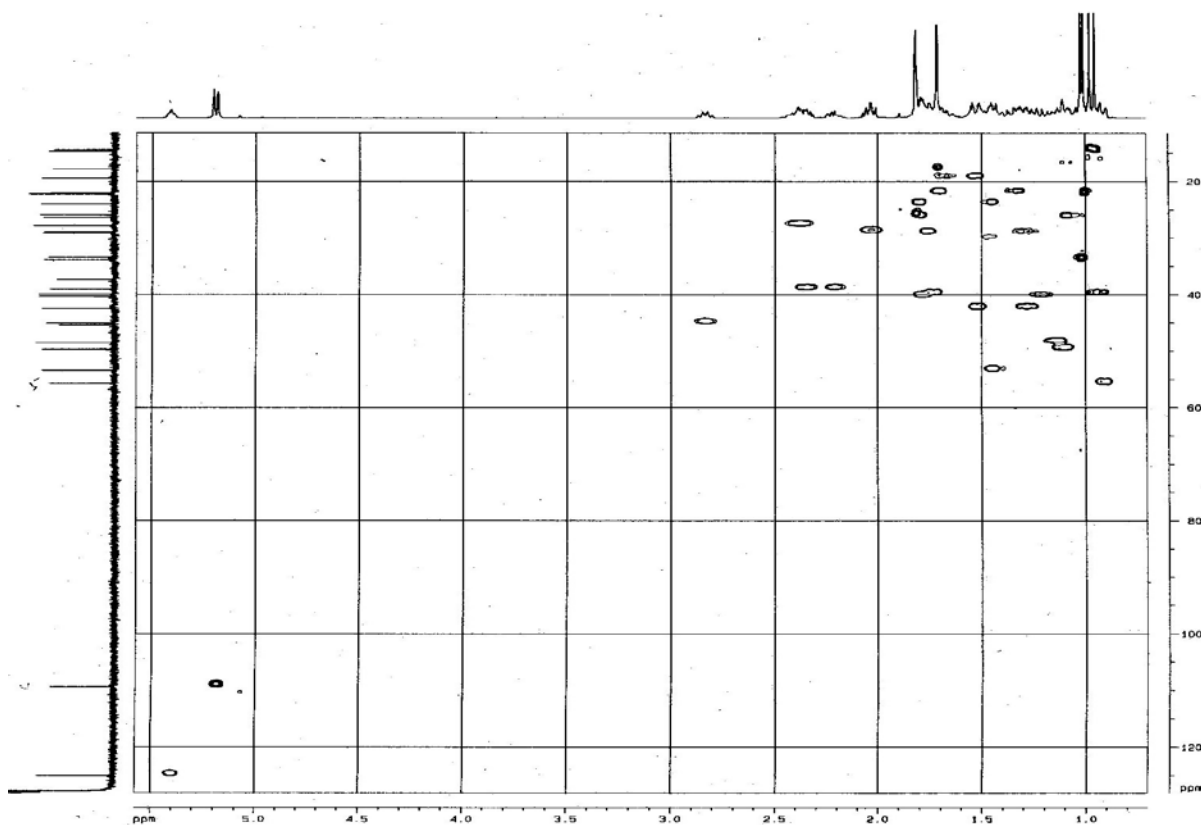

Fig. S10.7. HSQC of **29** (400 MHz, C<sub>6</sub>D<sub>6</sub>).

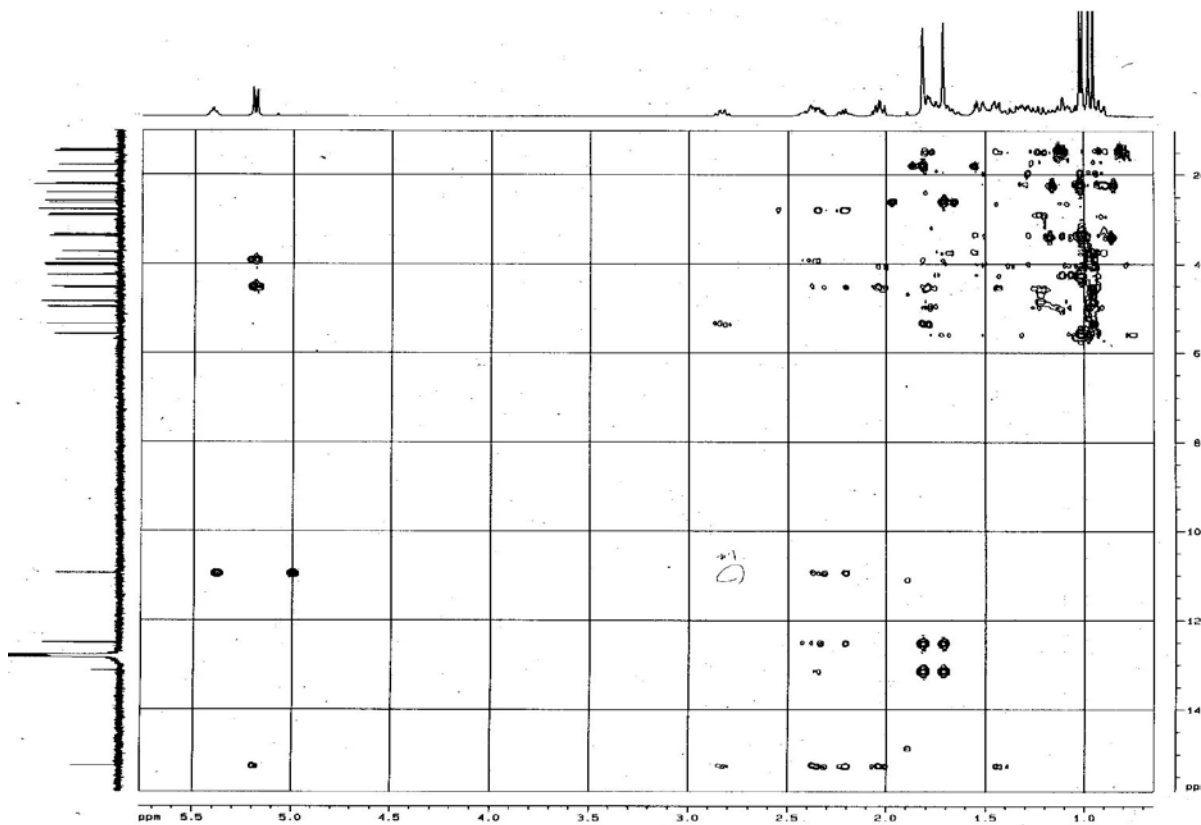

Fig. S10.8. HMBC of **29** (400 MHz, C<sub>6</sub>D<sub>6</sub>).

Product **29** from 27-norSQ **13a**

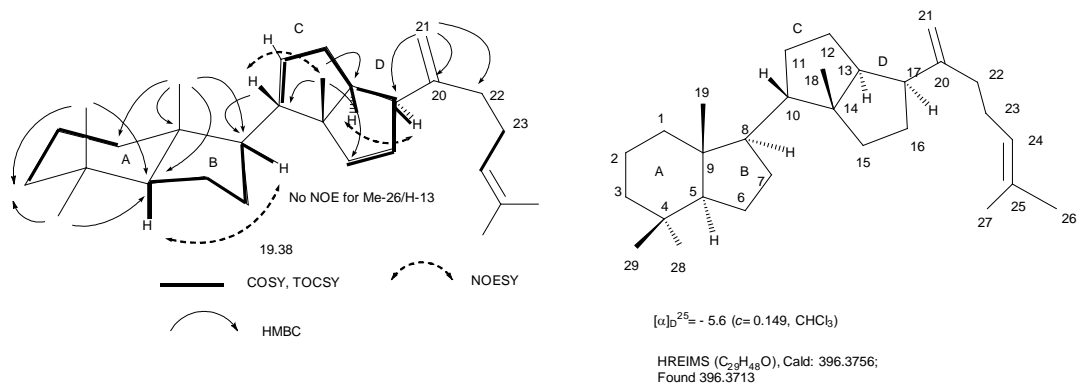

400 MHz, in  $\text{C}_6\text{D}_6$ ; the residual solvent peak:  $\delta_{\text{H}}$  7.28;  $\delta_{\text{C}}$  128.0 ppm

| NO. | $^1\text{H}$             | $^{13}\text{C}$ | NO. | $^1\text{H}$            | $^{13}\text{C}$ | NO. | $^1\text{H}$              | $^{13}\text{C}$ | NO. | $^1\text{H}$  | $^{13}\text{C}$ |
|-----|--------------------------|-----------------|-----|-------------------------|-----------------|-----|---------------------------|-----------------|-----|---------------|-----------------|
| 1   | 0.94(m,1H);1.71(m,1H)    | <b>39.89(t)</b> | 9   | —                       | <b>37.28(s)</b> | 17  | 2.83(dt, J=9.0 Hz, 1H)    | <b>45.06(d)</b> | 25  | —             | <b>131.3(s)</b> |
| 2   | 1.54 (m, 1H);1.67(m, 1H) | <b>19.38(t)</b> | 10  | 1.14(m, 1H)             | <b>48.47(d)</b> | 18  | 0.954(s,3H)               | <b>14.66(q)</b> | 26  | 1.817(s,3H)   | <b>25.85(q)</b> |
| 3   | 1.27 (m, 1H); 1.52(m,1H) | <b>42.42(t)</b> | 11  | 1.07(m, 1H); 1.78(m,1H) | <b>26.31(t)</b> | 19  | 0.978(s,3H)               | <b>14.37(q)</b> | 27  | 1.715 (s, 3H) | <b>17.75(q)</b> |
| 4   | —                        | <b>33.38(s)</b> | 12  | 1.45(m,1H); 1.80(m,1H)  | <b>23.98(t)</b> | 20  | —                         | <b>152.5(s)</b> | 28  | 1.022(s,3H)   | <b>33.80(q)</b> |
| 5   | 0.91(m, 1H)              | <b>55.70(d)</b> | 13  | 1.45 (m, 1H)            | <b>53.43(d)</b> | 21  | 5.18 (1H, s); 5.20(s, 1H) | <b>109.3(t)</b> | 29  | 1.010(s,3H)   | <b>22.20(q)</b> |
| 6   | 1.34(m,1H); 1.71(m, 1H)  | <b>21.98(t)</b> | 14  | —                       | <b>45.35(s)</b> | 22  | 2.21(m); 2.34(m)          | <b>38.99(t)</b> |     |               |                 |
| 7   | 1.30(m, 1H); 1.75(m, 1H) | <b>29.07(t)</b> | 15  | 1.22(m,1H); 1.77(m, 1H) | <b>40.32(t)</b> | 23  | 2.36(m,2H)                | <b>27.74(t)</b> |     |               |                 |
| 8   | 1.10 (m, 1H)             | <b>49.64(d)</b> | 16  | 2.03(m,2H)              | <b>28.88(t)</b> | 24  | 5.41(t, J=6.8 Hz, 1H)     | <b>125.0(d)</b> |     |               |                 |

**Fig. S10.9.** Assignments of NMR data of product **29** in  $\text{C}_6\text{D}_6$ , HR-EIMS and optical rotation.

## 11. EIMS and NMR data of product 30.

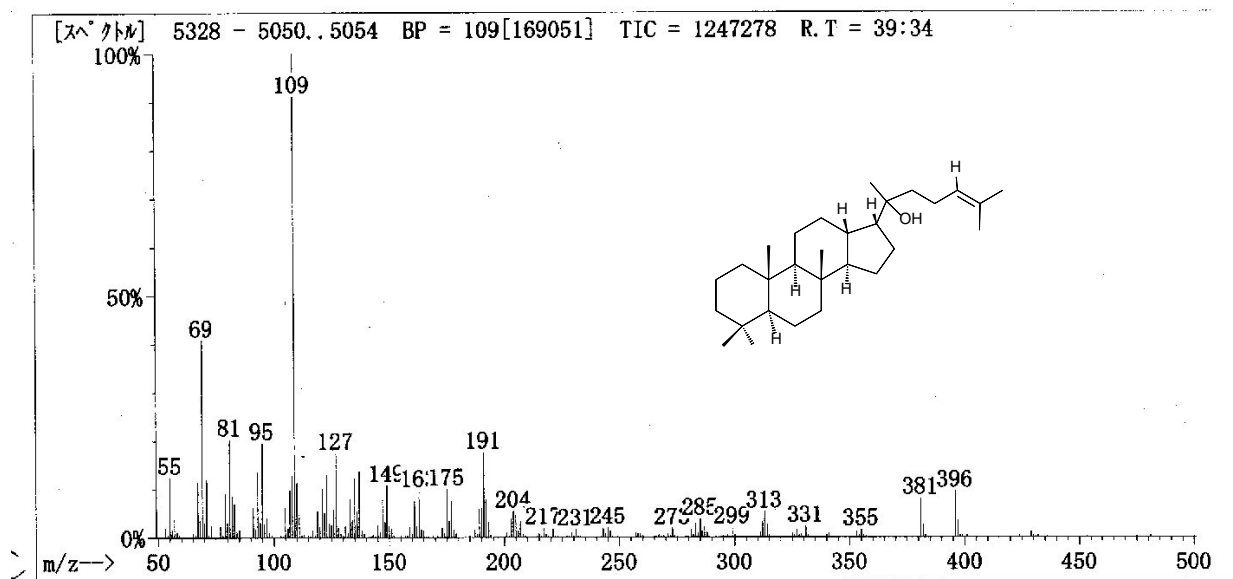

Fig. S11.1. EIMS of product 30.

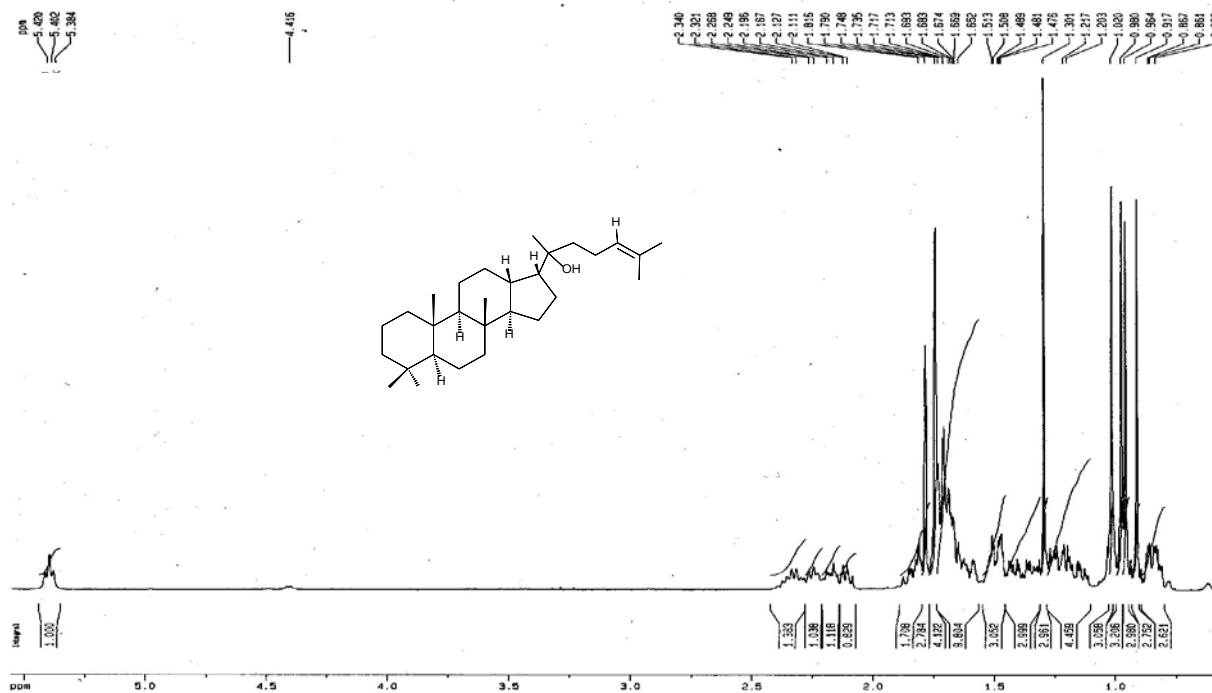

Fig. S11.2. <sup>1</sup>H NMR of Product 30 (400 MHz, C<sub>6</sub>D<sub>6</sub>).

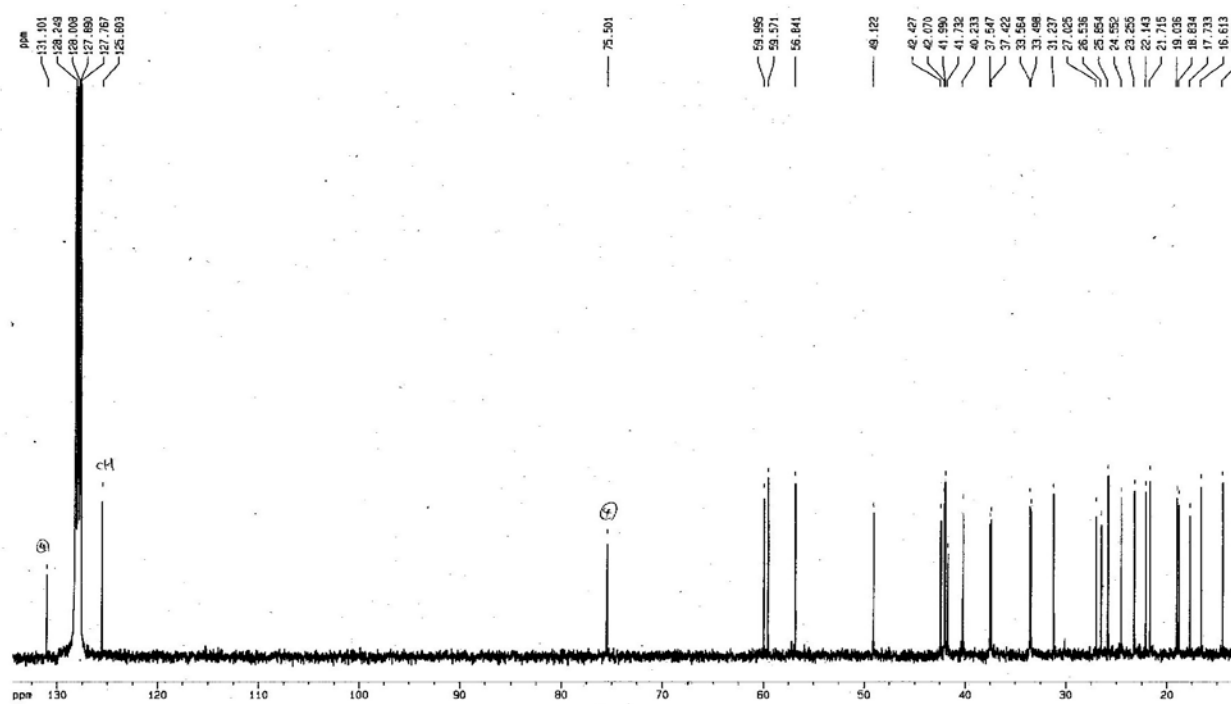

Fig. S11.3.  $^{13}\text{C}$  NMR of Product **30** (100 MHz,  $\text{C}_6\text{D}_6$ ).

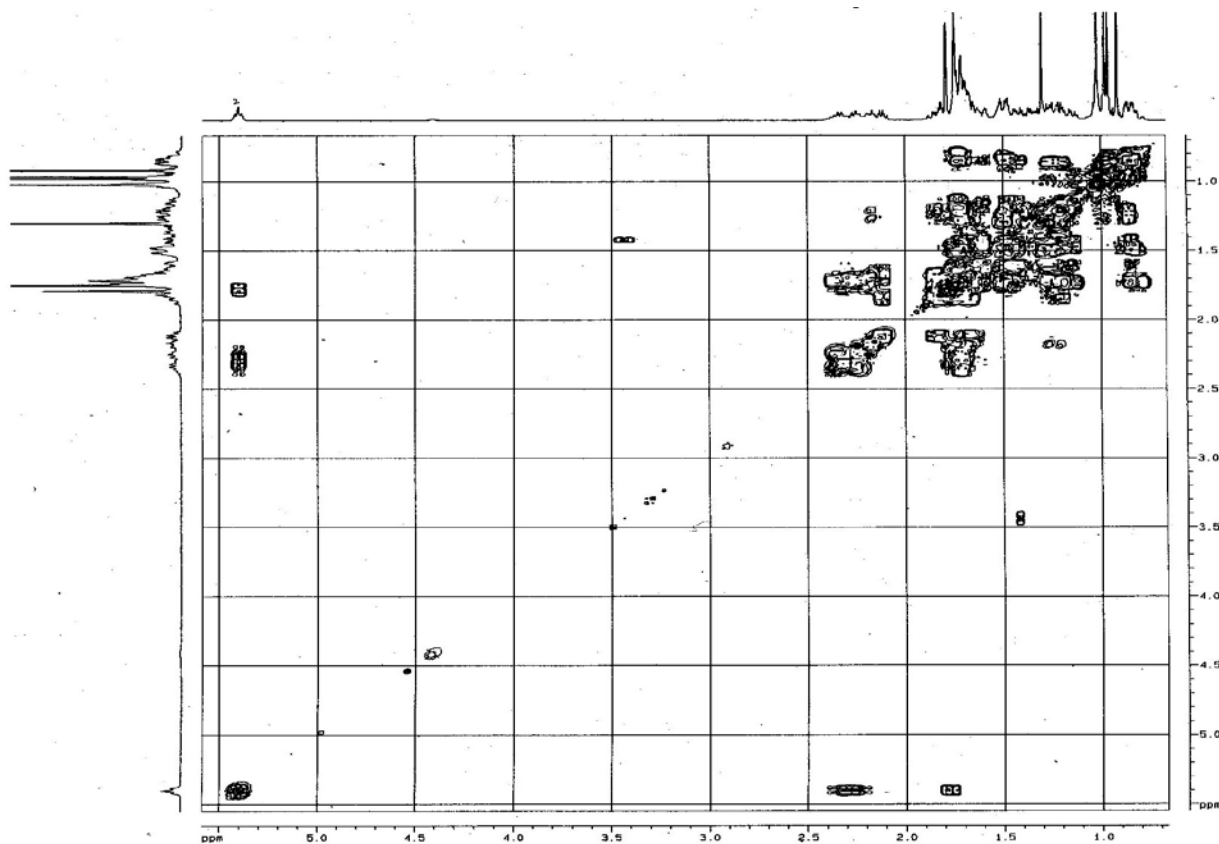

Fig. S11.4.  $^1\text{H}$ - $^1\text{H}$  COSY of product **30** (400 MHz,  $\text{C}_6\text{D}_6$ ).

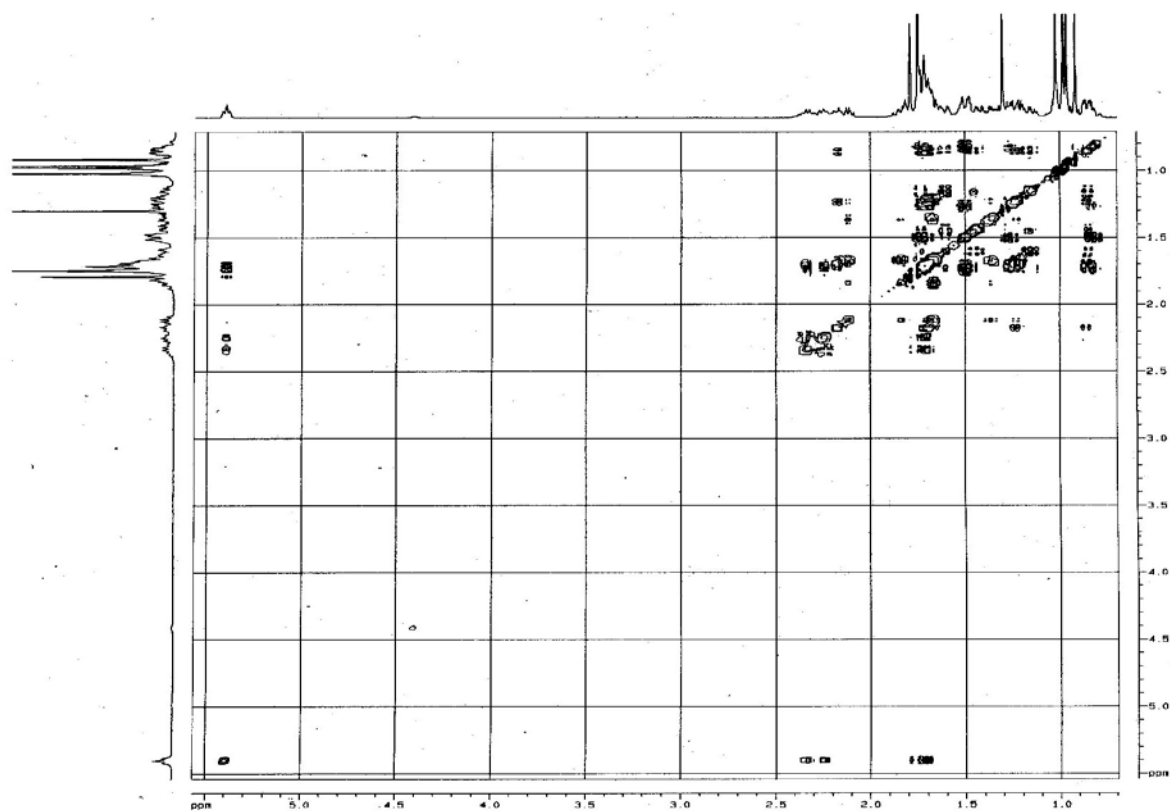

Fig. S11.5. TOCSY of **30** (400 MHz, C<sub>6</sub>D<sub>6</sub>).

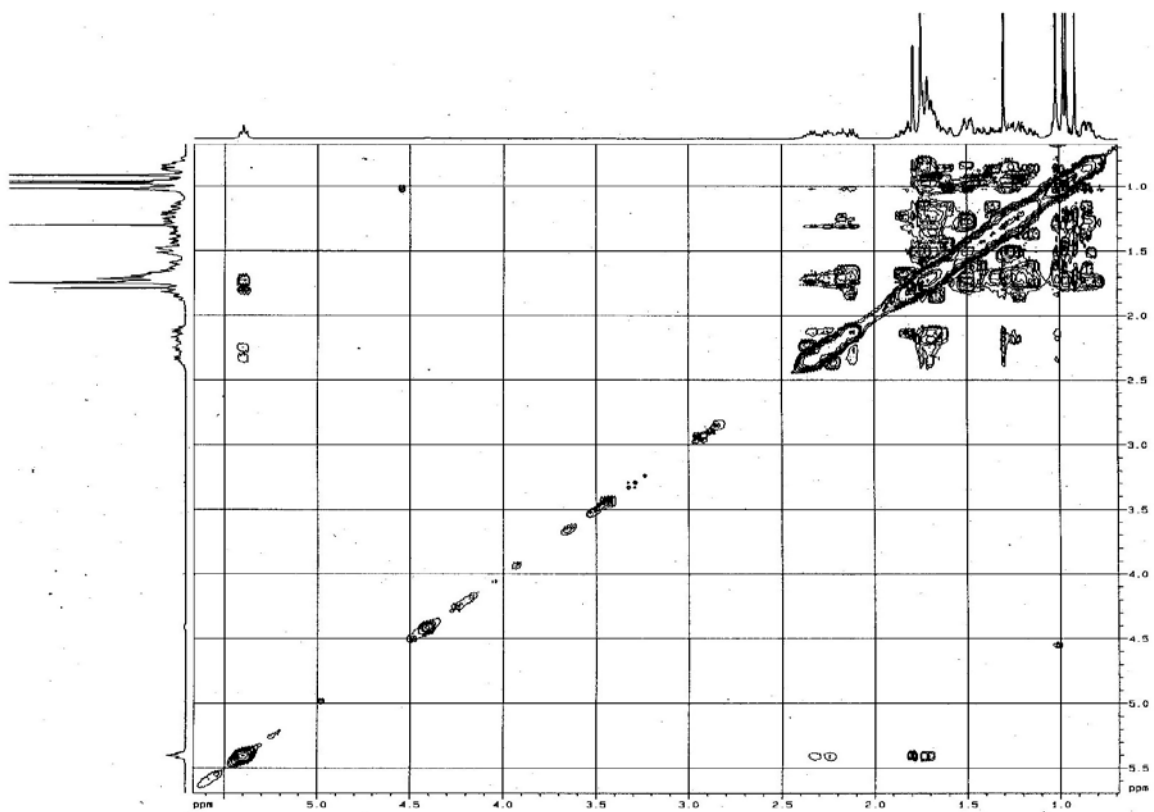

Fig. S11.6. NOESY of **30** (400 MHz, C<sub>6</sub>D<sub>6</sub>).

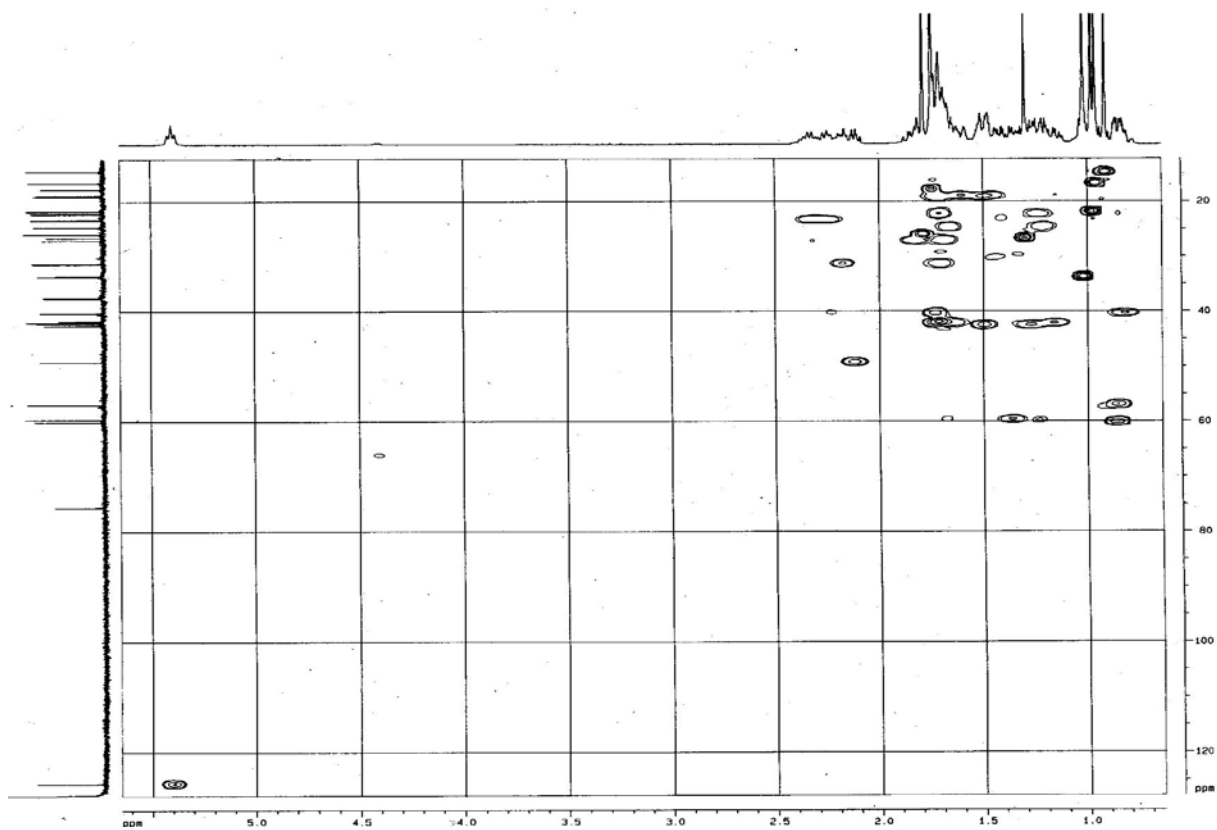

Fig. S11.7. HSQC of **30** (400 MHz, C<sub>6</sub>D<sub>6</sub>).

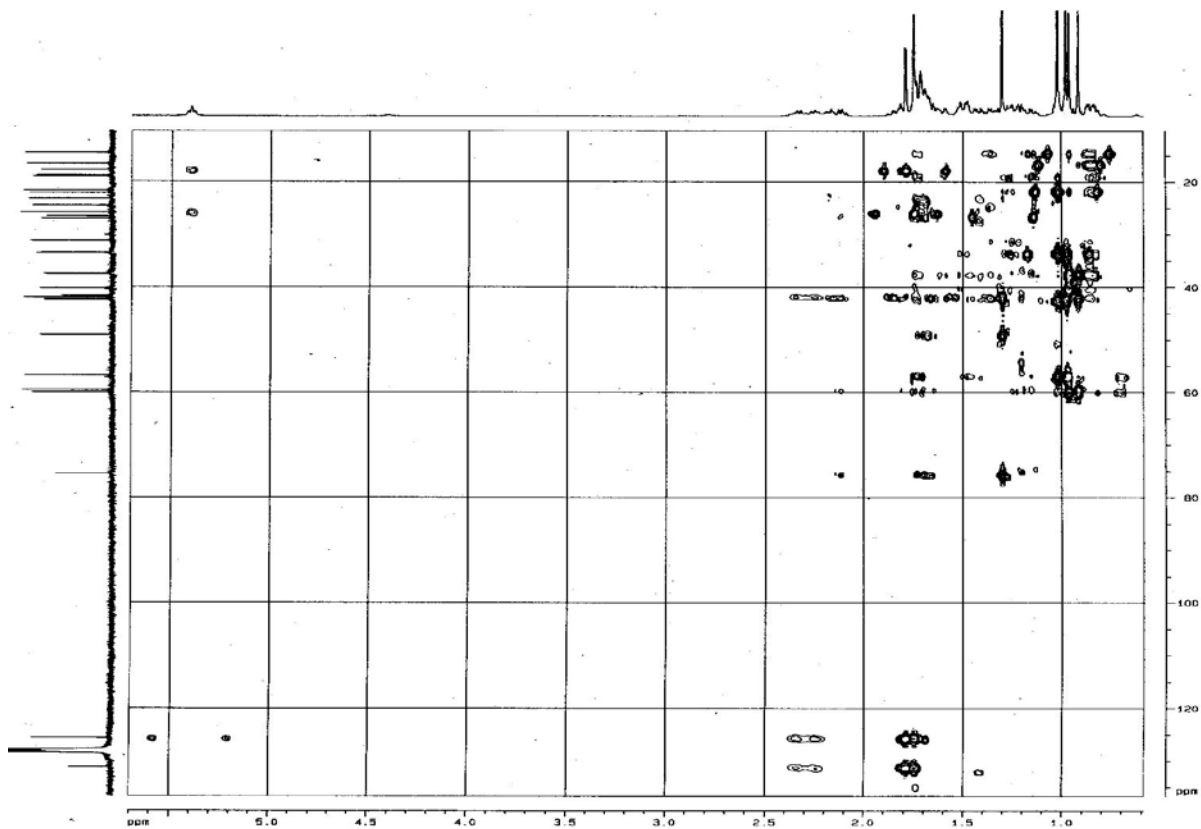

Fig. S11.8. HMBC of **30** (400 MHz, C<sub>6</sub>D<sub>6</sub>).



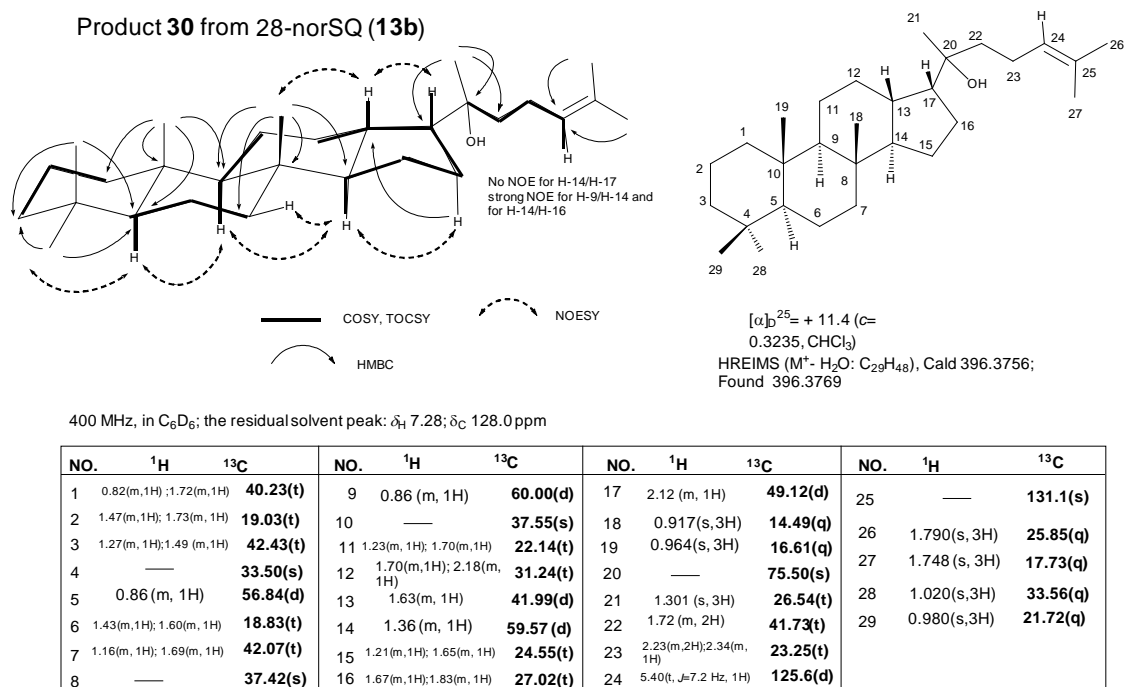

**Fig. S11.9.** Assignments of the NMR data of product **30** in C<sub>6</sub>D<sub>6</sub>, HR-EIMS and optical rotation.

## 12. EIMS and NMR data of product 31.

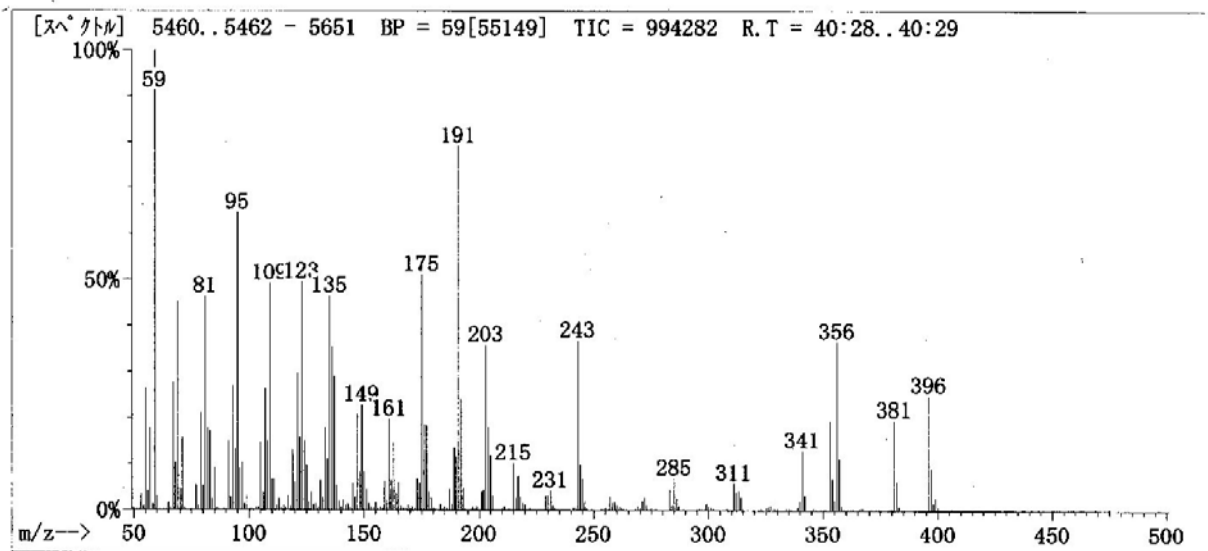

Fig. S12.1. EIMS of product 31.

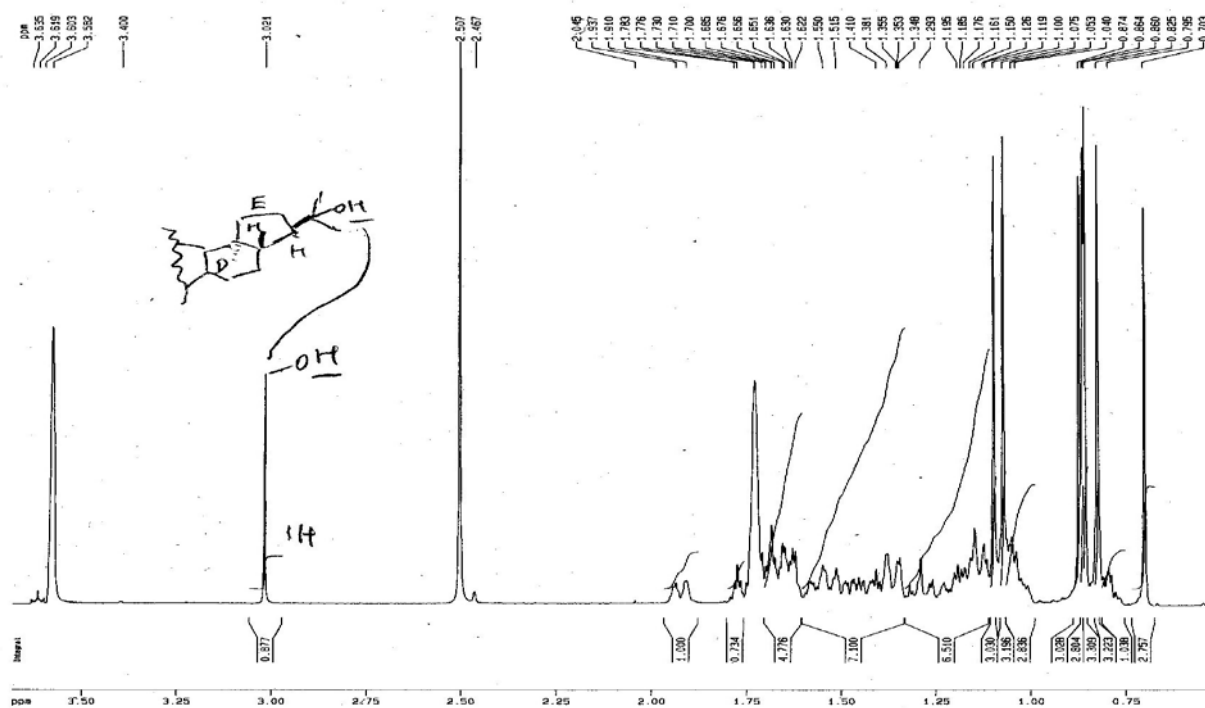

Fig. S12.2. <sup>1</sup>H NMR (whole spectrum) of Product 31 (400 MHz, THF d<sub>8</sub>).

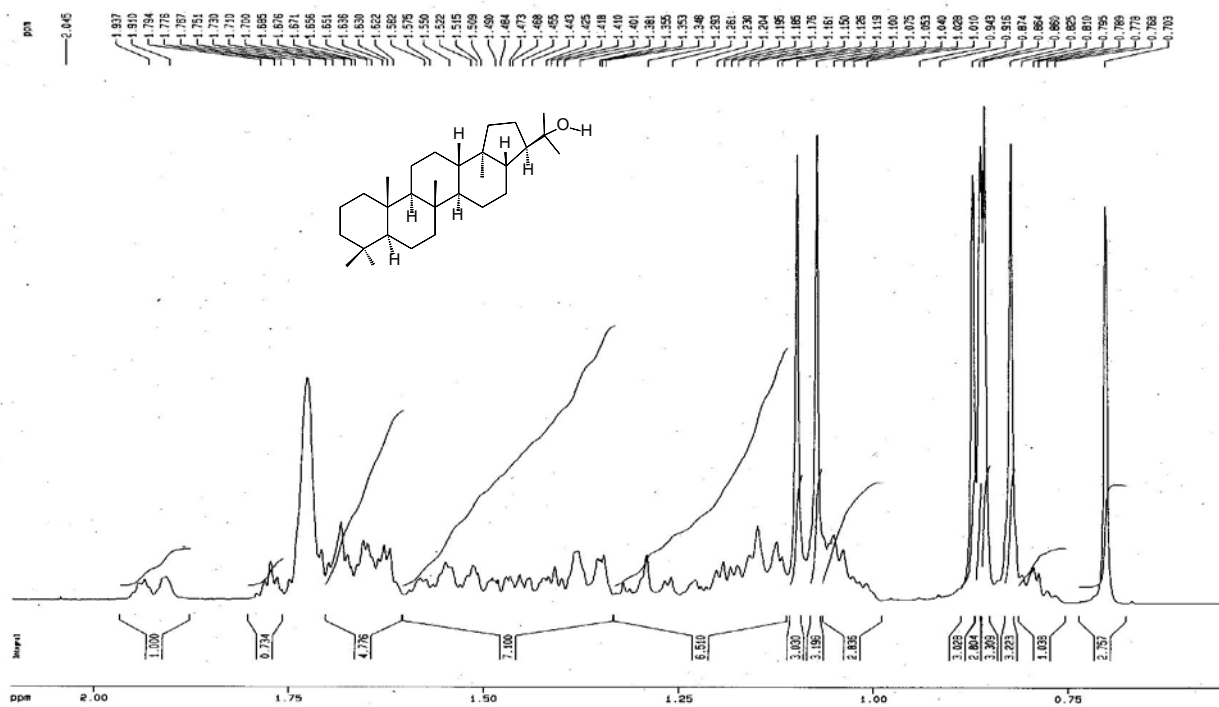

Fig. S12.3. <sup>1</sup>H NMR (expanded region) of Product **31** (400 MHz, THF d<sub>8</sub>).

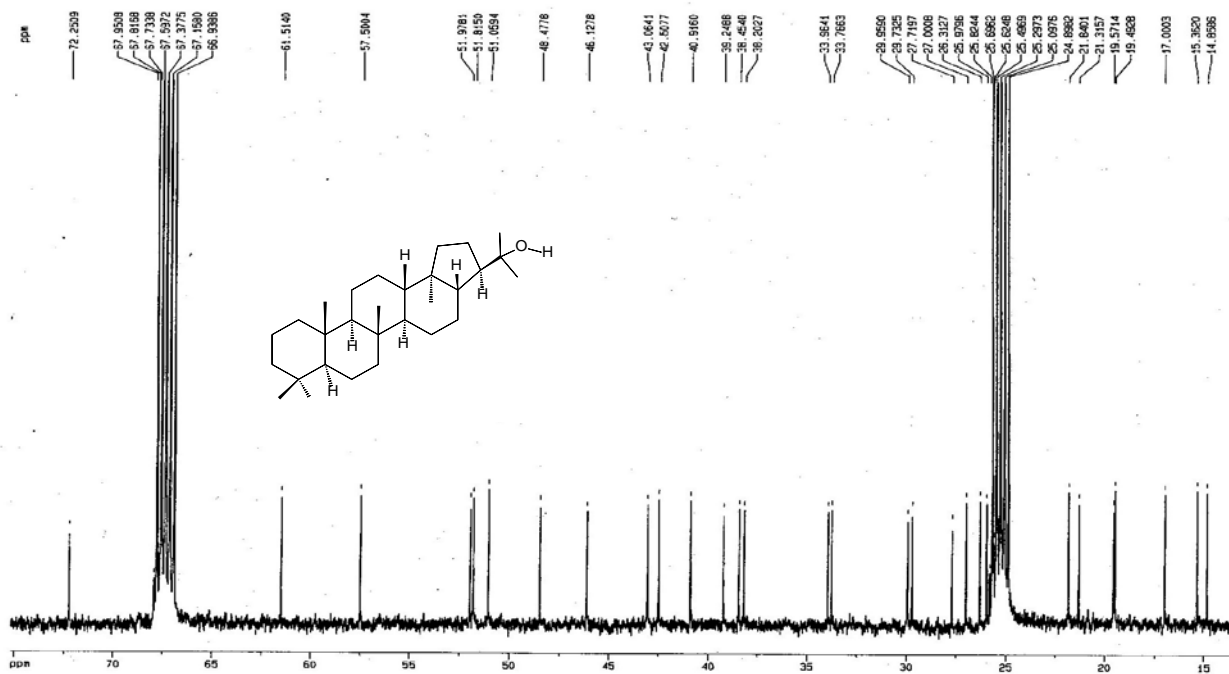

Fig. S12.4. <sup>13</sup>C NMR of Product **31** (400 MHz, THF d<sub>8</sub>).

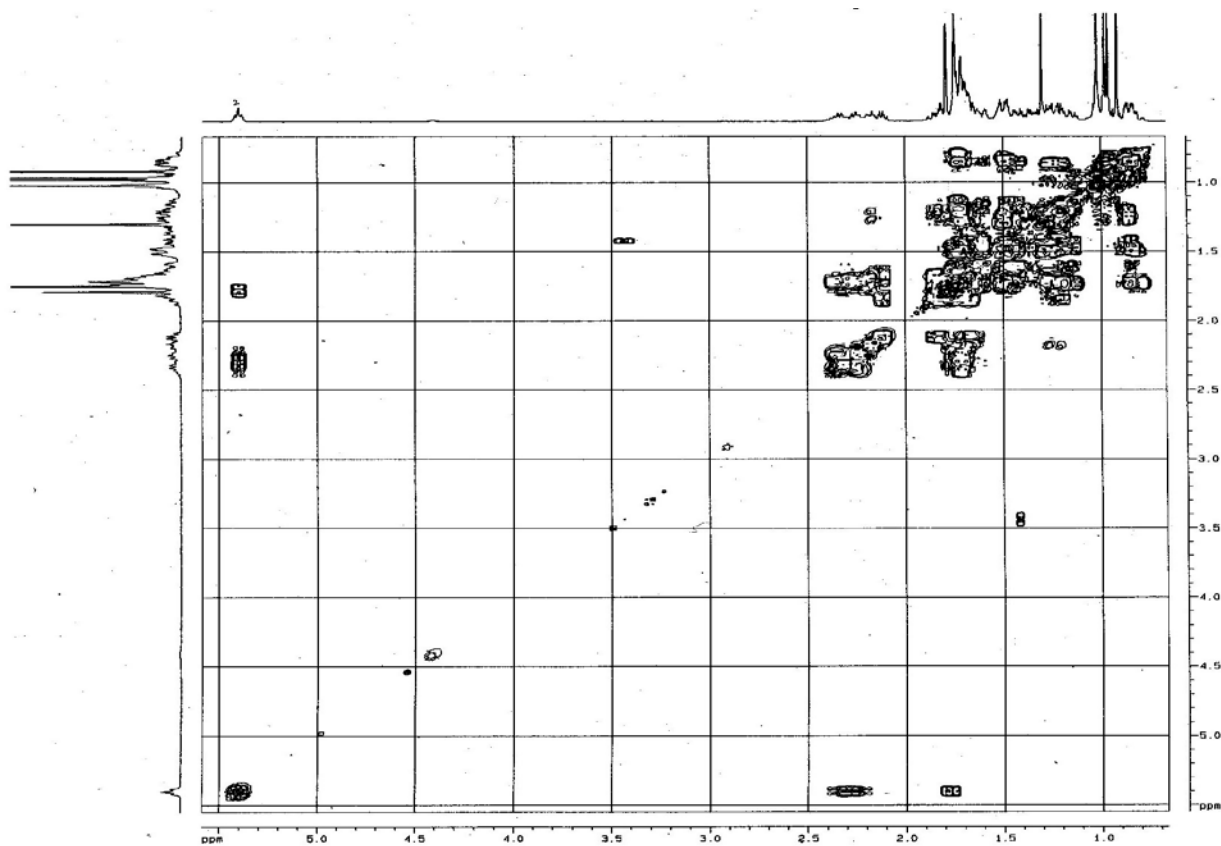

Fig. S12.5.  $^1\text{H}$ - $^1\text{H}$  COSY of product **31** (400 MHz, THF  $d_8$ ).

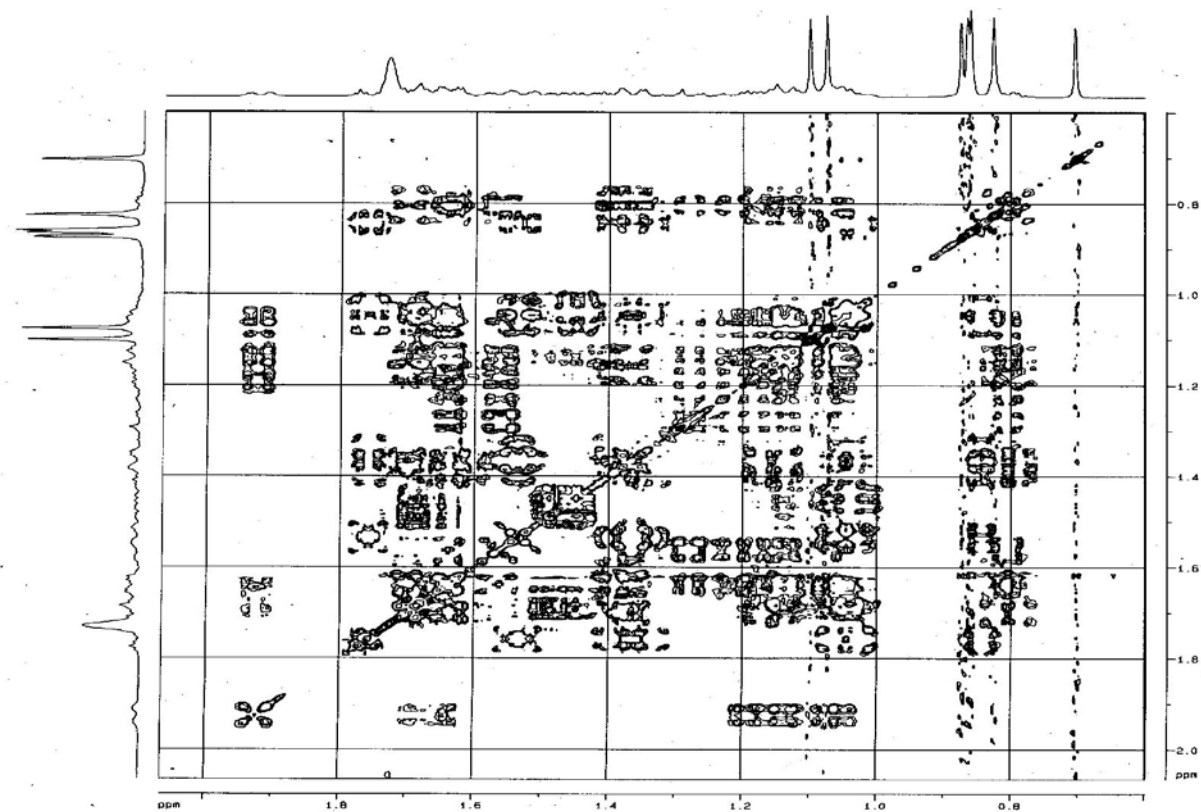

Fig. S12.6. TOCSY of **31** (400 MHz, THF  $d_8$ ).

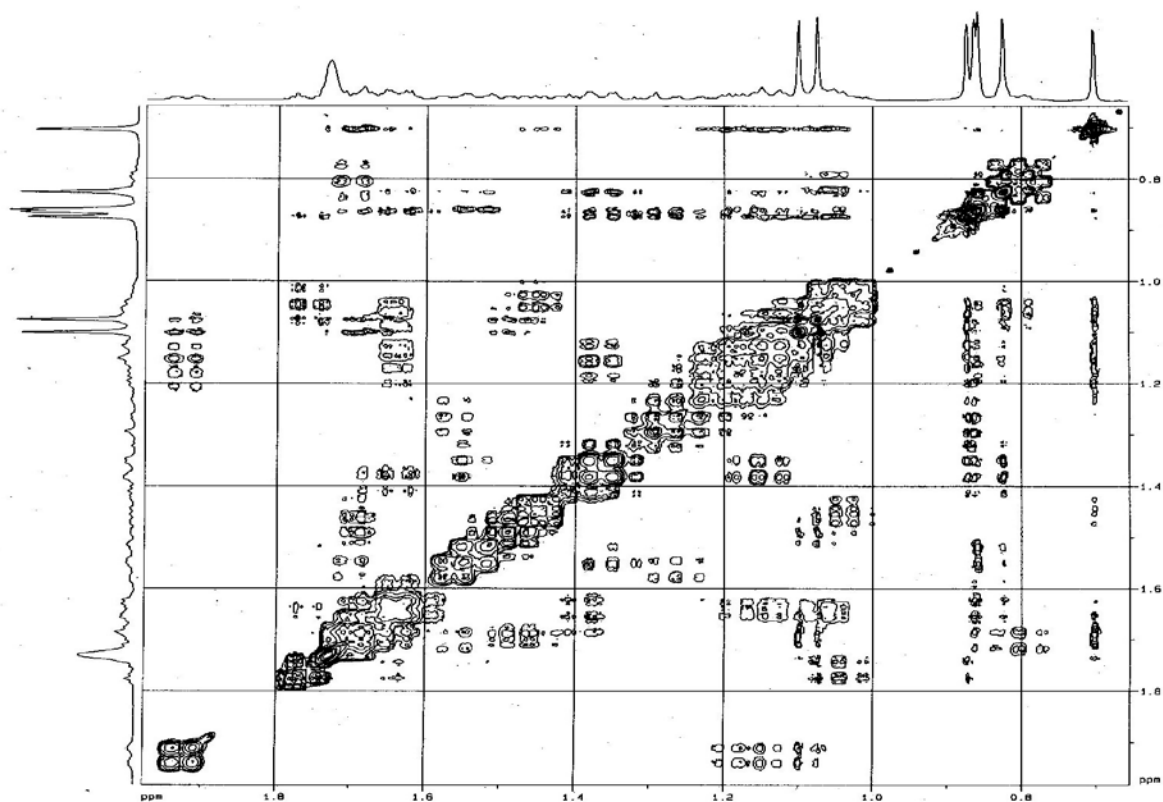

Fig. S12.7. NOESY of **31** (400 MHz, THF *d*<sub>8</sub>).

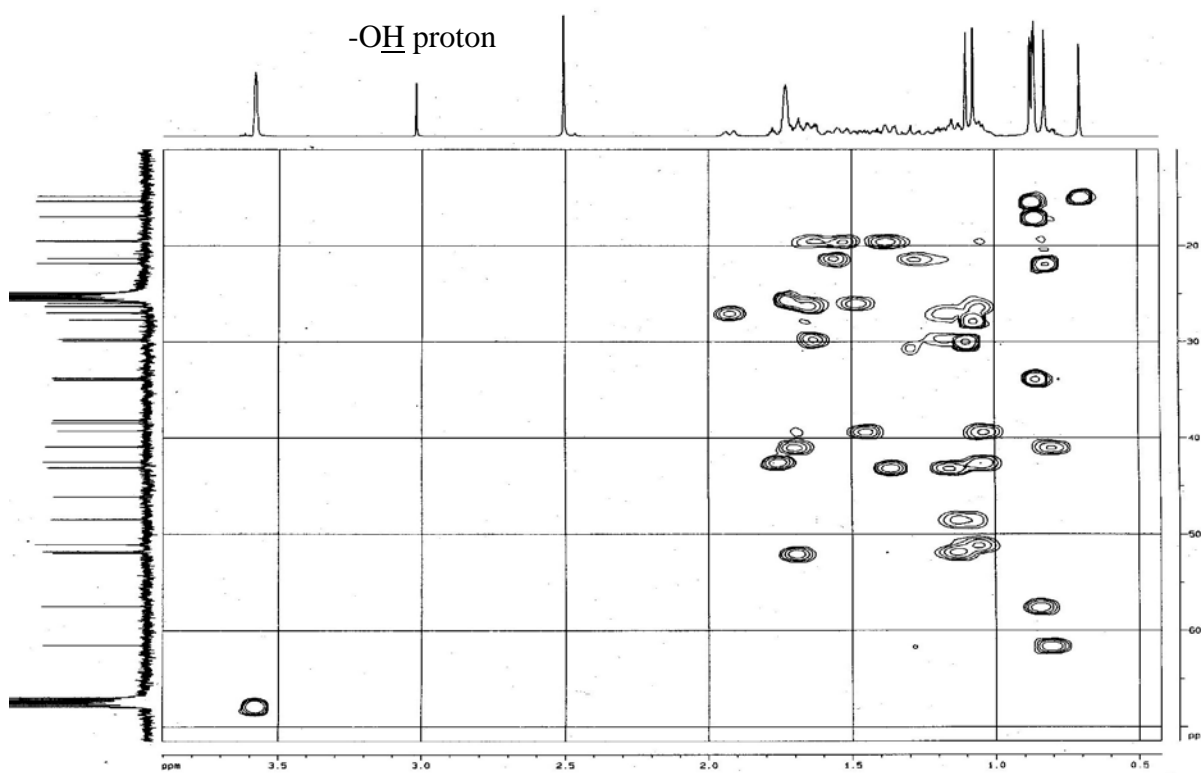

Fig. S13.8. HSQC (whole spectrum) of **31** (400 MHz, THF *d*<sub>8</sub>).

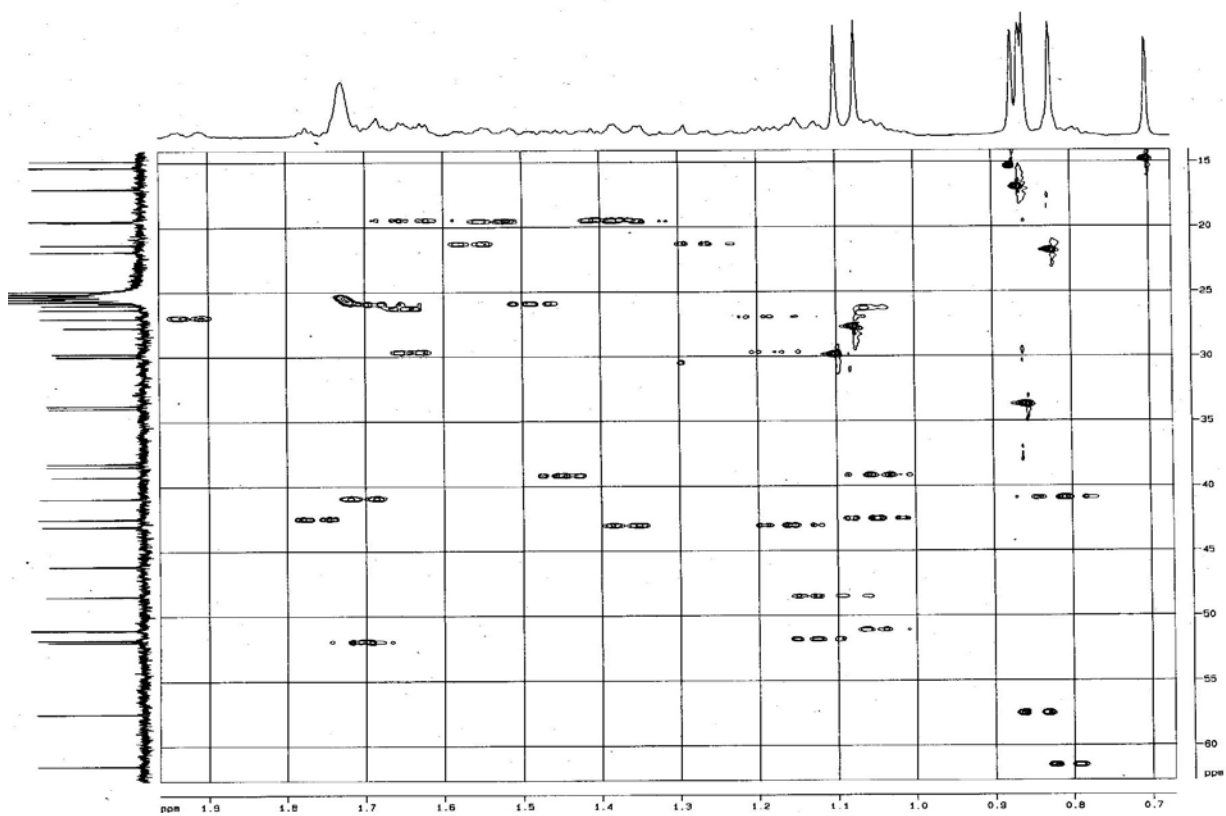

Fig. S12.9. HSQC (Expanded region) of **31** (400 MHz, THF  $d_8$ ).

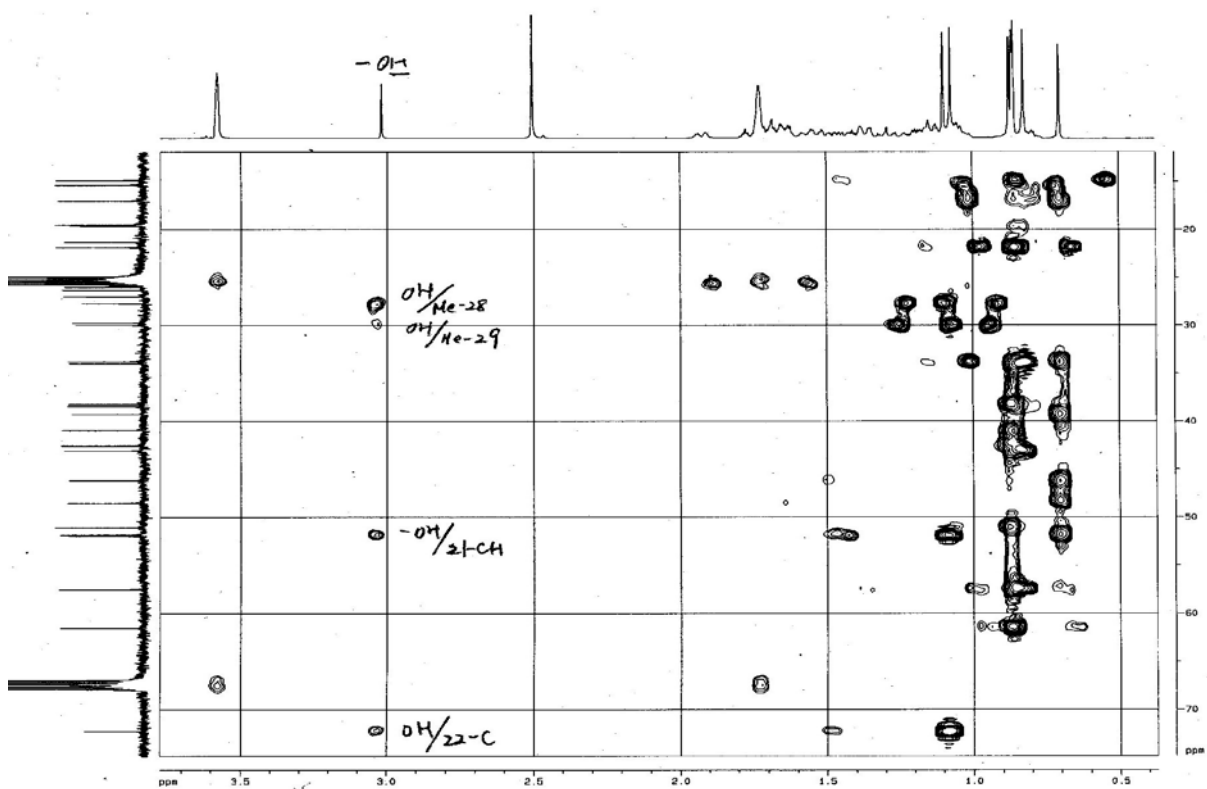

Fig. S12.10. HMBC (whole spectrum) of **31** (400 MHz, THF  $d_8$ ).

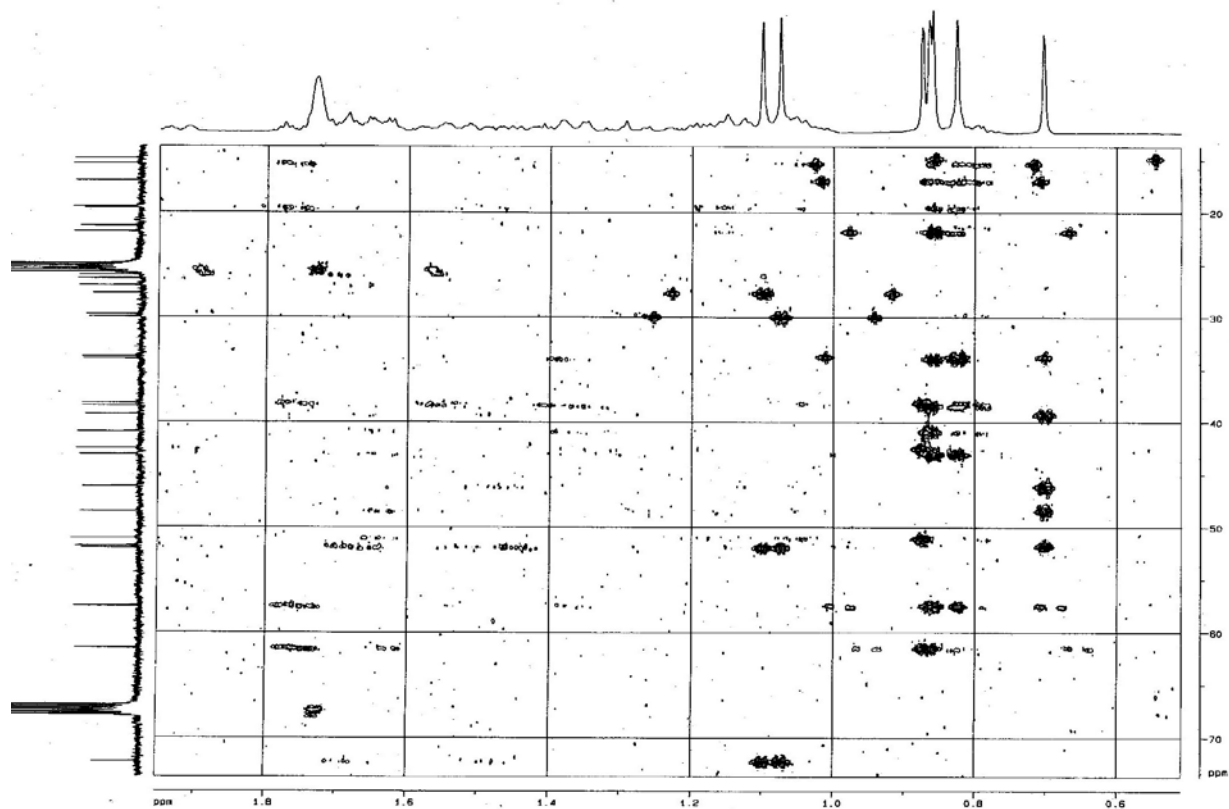

Fig. S12.11. HMBC (expanded region) of **31** (400 MHz, THF  $d_8$ ).

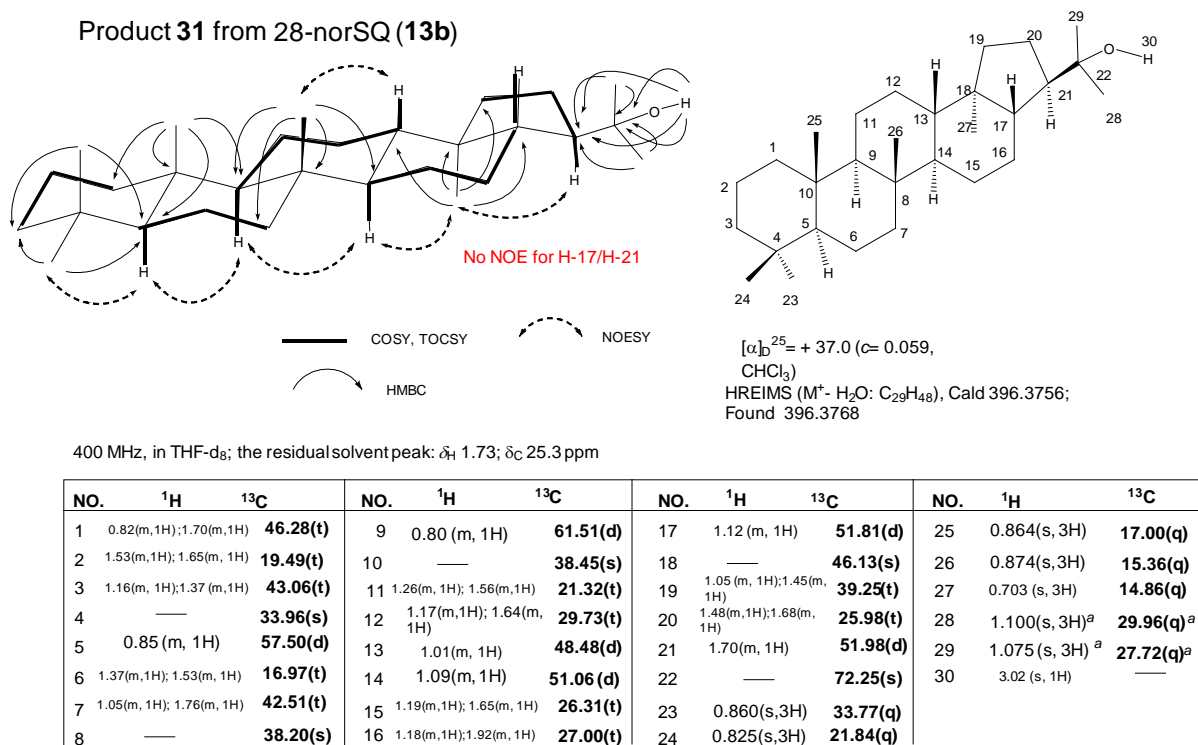

a: exchangeable

Fig. S12.12. Assignments of the NMR data of product **41** in THF  $d_8$ , HR-EIMS and optical rotation.
